# Supplementary material
Source: HighWire-hosted journal article supplement (https://erj.ersjournals.com/content/53/5/1802161)
Supplement: inline-supplementary-material-1 [file inline-supplementary-material-1.pdf]

## Appendix 1 Search criteria

Electronic search; electronic search was conducted monthly from 25<sup>th</sup> November 2015 till 25<sup>th</sup> January 2016. A second search was conducted on the 21<sup>st</sup> June 2017 to include articles published between 1<sup>st</sup> December 2015 and 30<sup>th</sup> June 2017.

| Data base                  | Frequency of search |
|----------------------------|---------------------|
| CENTRAL (Cochrane library) | Monthly             |
| MEDLINE (Ovid)             | Monthly             |
| Embase (Ovid)              | Monthly             |
| PsycINFO (Ovid)            | Monthly             |
| CINAHL (EBSCO)             | Monthly             |
| AMED(EBSCO)                | Monthly             |

The MEDLINE strategy and RCT filter ([Lefebvre 2011](#)) are adapted to identify trials in electronic databases.

#1 MeSH DESCRIPTOR severe asthma Explode All

#2 severe asthma

#3 brittle asthma

#4 uncontrolled asthma

#5 refractory asthma

#6 difficult to treat asthma

#7 poorly controlled asthma

#8 steroid dependent asthma

#9 irreversible asthma

#10 #2 or #3 or #4 or #5 or #6 or #7 or #8 AND #10

Filter to identify randomised controlled trials (RCTs)

1. exp "clinical trial [publication type]"/

2. (randomized or randomised).ab,ti.

3. placebo.ab,ti.

4. dt.fs.

5. randomly.ab,ti.

6. trial.ab,ti.

7. groups.ab,ti.

8. or/1-7

9. Animals/

10. Humans/

11. 10 not 9

## Appendix 2 Characteristics of included studies

|                           |                                                                                                                                                                                                                                                                                                                                                                                                                                                                                          |
|---------------------------|------------------------------------------------------------------------------------------------------------------------------------------------------------------------------------------------------------------------------------------------------------------------------------------------------------------------------------------------------------------------------------------------------------------------------------------------------------------------------------------|
| Study reference           | Ayres (Omalizumab) 2004                                                                                                                                                                                                                                                                                                                                                                                                                                                                  |
| Study title               | Efficacy and tolerability of anti-immunoglobulin E therapy with omalizumab in patients with poorly controlled (moderate-to-severe) allergic asthma                                                                                                                                                                                                                                                                                                                                       |
| Study duration            | 52 weeks                                                                                                                                                                                                                                                                                                                                                                                                                                                                                 |
| Trial registration:       | Not documented                                                                                                                                                                                                                                                                                                                                                                                                                                                                           |
| Study Population          | <p>Participants: omalizumab group, n = 206; best standard care (BSC) alone group, n=106</p> <p>Eligibility criteria: patients' age 12–75 years, with persistent (&gt;2 years) moderate-to-severe allergic asthma (according to the NHLBI guidelines), whose disease was poorly controlled. Poor control was defined as <math>\geq 1</math> emergency room visit/hospitalization and <math>\geq 1</math> additional course of oral corticosteroids because of asthma in the last year</p> |
| Setting                   | 49 centres in five European countries; France, n = 10; Germany, n = 9; Spain, n= 7; Switzerland, n =3; United Kingdom, n =20                                                                                                                                                                                                                                                                                                                                                             |
| Interventions             | BSC with or without subcutaneous omalizumab for 12 months                                                                                                                                                                                                                                                                                                                                                                                                                                |
| Adherence reported yes/no | No                                                                                                                                                                                                                                                                                                                                                                                                                                                                                       |
| Primary outcomes          | The annualised number of asthma deterioration-related incidents (ADRI)                                                                                                                                                                                                                                                                                                                                                                                                                   |
| Secondary outcomes        | Annualized number of clinically significant asthma exacerbations, morning FEV1, use of rescue salbutamol, and Wasserfallen asthma symptom score                                                                                                                                                                                                                                                                                                                                          |

|                           |                                                                                                                                                                                                                                                                                                                                                                                                                                                                                                                                                                                                                                                                                                                          |
|---------------------------|--------------------------------------------------------------------------------------------------------------------------------------------------------------------------------------------------------------------------------------------------------------------------------------------------------------------------------------------------------------------------------------------------------------------------------------------------------------------------------------------------------------------------------------------------------------------------------------------------------------------------------------------------------------------------------------------------------------------------|
| Study reference           | Bardelas (Omalizumab) 2012                                                                                                                                                                                                                                                                                                                                                                                                                                                                                                                                                                                                                                                                                               |
| Study title               | A 26-Week, Randomized, Double-Blind, Placebo-Controlled, Multicentre Study to Evaluate the Effect of Omalizumab on Asthma Control in Patients with Persistent Allergic Asthma                                                                                                                                                                                                                                                                                                                                                                                                                                                                                                                                            |
| Study duration            | 2-week screening period. 24 weeks                                                                                                                                                                                                                                                                                                                                                                                                                                                                                                                                                                                                                                                                                        |
| Trial registration:       | NCT00267202                                                                                                                                                                                                                                                                                                                                                                                                                                                                                                                                                                                                                                                                                                              |
| Study Population          | Participants: omalizumab group, n= 136; control group, n= 135<br>Eligibility criteria: patients' age $\geq 12$ years; inadequately controlled persistent allergic asthma (ACT total score of $\leq 19$ ); treated with Step 4 or higher asthma maintenance therapy (ICS + LABA/leukotriene receptor antagonist/theophylline/zileuton) according to the 2007 NHLBI guidelines; total serum IgE 30 to 700 IU/mL. One or more of the following with four weeks of screening phase: symptoms $> 2$ days/week; night-time awakenings $\geq 1$ time/week; use of SABA $> 2$ days/week; FEV1 $\leq 80\%$ predicted; background inhaled steroid dose: at least 250 mcg fluticasone twice daily or 320 mcg budesonide twice daily |
| Setting                   | United States                                                                                                                                                                                                                                                                                                                                                                                                                                                                                                                                                                                                                                                                                                            |
| Interventions             | Omalizumab administered subcutaneously based on body weight and serum IgE; 150 or 300 mg every four weeks or 225, 300 or 375 mg every two weeks versus placebo with same inactive ingredients as study drug for 24 weeks                                                                                                                                                                                                                                                                                                                                                                                                                                                                                                 |
| Adherence reported yes/no | No                                                                                                                                                                                                                                                                                                                                                                                                                                                                                                                                                                                                                                                                                                                       |
| Primary outcomes          | The change from baseline to week 24 in ACT total score                                                                                                                                                                                                                                                                                                                                                                                                                                                                                                                                                                                                                                                                   |
| Secondary outcomes        | The change from baseline to week 24 for the following outcomes; the Investigator's Global Evaluation of Treatment Effectiveness (IGETE). Work productivity and activity impairment questionnaire–asthma (WPAI-A), electronic diaries, FEV1, use of rescue corticosteroids, safety assessment                                                                                                                                                                                                                                                                                                                                                                                                                             |

|                           |                                                                                                                                                                                                                                                                                                                                                                                                                                                                                                                                                                                                                                                                                                                                                                                                                                                                                                             |
|---------------------------|-------------------------------------------------------------------------------------------------------------------------------------------------------------------------------------------------------------------------------------------------------------------------------------------------------------------------------------------------------------------------------------------------------------------------------------------------------------------------------------------------------------------------------------------------------------------------------------------------------------------------------------------------------------------------------------------------------------------------------------------------------------------------------------------------------------------------------------------------------------------------------------------------------------|
| Study reference           | Beeh (Tiotropium) 2014                                                                                                                                                                                                                                                                                                                                                                                                                                                                                                                                                                                                                                                                                                                                                                                                                                                                                      |
| Study title               | Tiotropium Respimat® in asthma: a double-blind, randomised, dose-ranging study in adult patients with moderate asthma                                                                                                                                                                                                                                                                                                                                                                                                                                                                                                                                                                                                                                                                                                                                                                                       |
| Study duration            | 4-week run-in period. 16 weeks of treatment phase and 3 weeks follow up period                                                                                                                                                                                                                                                                                                                                                                                                                                                                                                                                                                                                                                                                                                                                                                                                                              |
| Trial registration:       | NCT01233284                                                                                                                                                                                                                                                                                                                                                                                                                                                                                                                                                                                                                                                                                                                                                                                                                                                                                                 |
| Study Population          | Participants: crossover trial, 149 patients randomised<br>Eligibility criteria: Male or female patients aged 18–75 years, with at least a 3-month history of asthma at the time of enrolment and an initial diagnosis of asthma made before the age of 40 years. Asthma maintenance treatment; stable medium-dose ICS (400–800 µg budesonide or equivalent), alone or in a fixed-dose combination with a LABA or short-acting β <sub>2</sub> -agonist, for at least 4 weeks prior to Visit 1. A diagnosis of asthma confirmed at Visit 1 was required with bronchodilator reversibility (15–30 minutes after 400 µg salbutamol) of ≥12% and ≥200 mL; ACQ-7 mean score of ≥1.5 at Visits 1 and 2, to have a pre-bronchodilator FEV <sub>1</sub> of ≥60% and ≤90% of predicted normal FEV <sub>1</sub> at Visit 1, and to demonstrate absolute FEV <sub>1</sub> variability within 30% between Visits 1 and 2 |
| Setting                   | 19 sites in three European countries; Germany, Austria and Ukraine                                                                                                                                                                                                                                                                                                                                                                                                                                                                                                                                                                                                                                                                                                                                                                                                                                          |
| Interventions             | tiotropium 5 µg, 2.5 µg or 1.25 µg or placebo, all delivered via the Respimat® Soft Mist™ inhaler for 16 weeks                                                                                                                                                                                                                                                                                                                                                                                                                                                                                                                                                                                                                                                                                                                                                                                              |
| Adherence reported yes/no | No                                                                                                                                                                                                                                                                                                                                                                                                                                                                                                                                                                                                                                                                                                                                                                                                                                                                                                          |
| Primary outcomes          | Peak FEV <sub>1</sub> measured within the first 3 hours after dosing, after every 4-week treatment period                                                                                                                                                                                                                                                                                                                                                                                                                                                                                                                                                                                                                                                                                                                                                                                                   |
| Secondary outcomes        | Trough FEV <sub>1</sub> ; peak FVC within the first 3 hours after dosing (FVC)(0-3h); trough FVC; FEV <sub>1</sub> area under the curve (AUC) within the first 3 hours after dosing {FEV <sub>1</sub> AUC(0-3h)}; FVC AUC(0-3h); pre-dose PEF morning and PEF evening ACQ-7 at the end of every 4-week treatment period                                                                                                                                                                                                                                                                                                                                                                                                                                                                                                                                                                                     |

|                           |                                                                                                                                                                                                                                                                                                                                 |
|---------------------------|---------------------------------------------------------------------------------------------------------------------------------------------------------------------------------------------------------------------------------------------------------------------------------------------------------------------------------|
| Study reference           | Berry (Eternacept) 2006                                                                                                                                                                                                                                                                                                         |
| Study title               | Evidence of a Role of Tumor Necrosis Factor $\alpha$ in Refractory Asthma                                                                                                                                                                                                                                                       |
| Study duration            | 24 weeks                                                                                                                                                                                                                                                                                                                        |
| Trial registration:       | NCT00276029                                                                                                                                                                                                                                                                                                                     |
| Study Population          | Participants: Crossover trial, 30 patients were randomised<br>Eligibility criteria stated as: Patients with refractory asthma, as per ATS criteria with the exception that the daily dose of ICS required to meet the definition was modified to >2000 $\mu$ g of beclomethasone or its equivalent to reflect European practice |
| Setting                   | Leicester, United Kingdom                                                                                                                                                                                                                                                                                                       |
| Interventions             | Placebo (1 ml of 0.9% saline) or etanercept (25 mg made into a 1-ml solution with the addition of the manufacturer's diluent) was administered subcutaneously twice weekly                                                                                                                                                      |
| Adherence reported yes/no | Yes                                                                                                                                                                                                                                                                                                                             |
| Primary outcomes          | The difference in the change in the PC20 from 0 to 10 weeks between the placebo and etanercept treatment phases and the difference in the change in the asthma quality-of-life score from 0 to 10 weeks between the treatment phases                                                                                            |
| Secondary outcomes        | The net change in post-bronchodilator FEV1, FEF25–75, and FVC; symptom scores; exhaled nitric oxide concentrations; computed alveolar nitric oxide concentrations; differential inflammatory cell counts in sputum; and mediator concentrations in sputum supernatant                                                           |

|                           |                                                                                                                                                                                                                                                                                                                                                                                                                                                                                         |
|---------------------------|-----------------------------------------------------------------------------------------------------------------------------------------------------------------------------------------------------------------------------------------------------------------------------------------------------------------------------------------------------------------------------------------------------------------------------------------------------------------------------------------|
| Study reference           | Bel Mepolizumab 2014                                                                                                                                                                                                                                                                                                                                                                                                                                                                    |
| Study title               | Oral Glucocorticoid-Sparing Effect of Mepolizumab in Eosinophilic Asthma                                                                                                                                                                                                                                                                                                                                                                                                                |
| Study duration            | 3-8-week run-in period. 32 weeks                                                                                                                                                                                                                                                                                                                                                                                                                                                        |
| Trial registration:       | NCT01691508                                                                                                                                                                                                                                                                                                                                                                                                                                                                             |
| Study Population          | Participants: mepolizumab group, n=69; placebo group, n=66<br>Eligibility criteria: at least a 6-month history of maintenance treatment with systemic glucocorticoids (5 to 35 mg per day of prednisone or its equivalent) before entering the study; high-dose inhaled glucocorticoids and an additional controller; blood eosinophil level of either $\geq 300$ cells/ $\mu$ L during the 12-month period before screening or $\geq 150$ cells/ $\mu$ L during the optimization phase |
| Setting                   | Amsterdam, Australia and United Kingdom                                                                                                                                                                                                                                                                                                                                                                                                                                                 |
| Interventions             | Mepolizumab 100mg or placebo was administered subcutaneously once every 4 weeks until week 20                                                                                                                                                                                                                                                                                                                                                                                           |
| Adherence reported yes/no | No                                                                                                                                                                                                                                                                                                                                                                                                                                                                                      |
| Primary outcomes          | Percentage reduction in the daily oral glucocorticoid dose during weeks 20 to 24 as compared with the dose determined during the optimization phase                                                                                                                                                                                                                                                                                                                                     |
| Secondary outcomes        | Proportions of patients who had a reduction of 50% or more in the oral glucocorticoid dose, who had a reduction in the oral glucocorticoid dose to a value of $\leq 5.0$ mg per day, and who had a total cessation in oral glucocorticoid use; the median percentage reduction in the oral glucocorticoid dose; annualised rates of asthma exacerbations; the mean change from baseline in the FEV1 before and after bronchodilation; ACQ-5 score; SGRQ score; safety; immunogenicity   |

|                           |                                                                                                                                                                                                                                                                                                                                                                                                                                                                                                                                                |
|---------------------------|------------------------------------------------------------------------------------------------------------------------------------------------------------------------------------------------------------------------------------------------------------------------------------------------------------------------------------------------------------------------------------------------------------------------------------------------------------------------------------------------------------------------------------------------|
| Study reference           | Bjermer (Reslizumab) 2016                                                                                                                                                                                                                                                                                                                                                                                                                                                                                                                      |
| Study title               | Reslizumab for Inadequately Controlled Asthma with Elevated Blood Eosinophil Levels: A Randomized Phase 3 Study                                                                                                                                                                                                                                                                                                                                                                                                                                |
| Study duration            | 20 weeks                                                                                                                                                                                                                                                                                                                                                                                                                                                                                                                                       |
| Trial registration:       | NCT01270464                                                                                                                                                                                                                                                                                                                                                                                                                                                                                                                                    |
| Study Population          | Participants: reslizumab 0.3mg/kg group, n=104; reslizumab 3.0mg/kg group, n=106; placebo group, n=104<br>Eligibility criteria stated as: patients of the age 12-75 years with moderate-severe asthma, inadequately controlled (ACQ-7 score $\geq 1.5$ ), airway reversibility ( $\geq 12\%$ to SABA), were receiving treatment with at least a medium-dose ICS (fluticasone propionate $\geq 440$ $\mu\text{g/day}$ or equivalent) and had at least one blood eosinophil count of $\geq 400$ cells/ $\mu\text{L}$ during the screening period |
| Setting                   | 68 locations across 13 countries                                                                                                                                                                                                                                                                                                                                                                                                                                                                                                               |
| Interventions             | IV infusion of reslizumab 0.3 mg/kg, reslizumab 3.0 mg/kg, or placebo once every 4 weeks (total of 4 doses)                                                                                                                                                                                                                                                                                                                                                                                                                                    |
| Adherence reported yes/no | Yes                                                                                                                                                                                                                                                                                                                                                                                                                                                                                                                                            |
| Primary outcomes          | Improvement in prebronchodilator FEV1 compared with placebo over 16 weeks                                                                                                                                                                                                                                                                                                                                                                                                                                                                      |
| Secondary outcomes        | FVC, ACQ-5, Asthma Symptom Utility Index (ASUI19), AQLQ, rescue inhaler use, and blood eosinophil levels over 16 weeks                                                                                                                                                                                                                                                                                                                                                                                                                         |



|                           |                                                                                                                                                                                                                                                                                                                                                                                                                                                                                                                                                             |
|---------------------------|-------------------------------------------------------------------------------------------------------------------------------------------------------------------------------------------------------------------------------------------------------------------------------------------------------------------------------------------------------------------------------------------------------------------------------------------------------------------------------------------------------------------------------------------------------------|
| Study reference           | Bleecker (Benralizumab) 2016                                                                                                                                                                                                                                                                                                                                                                                                                                                                                                                                |
| Study title               | Efficacy and safety of benralizumab for patients with severe asthma uncontrolled with high-dosage inhaled corticosteroids and long-acting $\beta$ 2-agonists (SIROCCO): a randomised, multicentre, placebo-controlled phase 3 trial                                                                                                                                                                                                                                                                                                                         |
| Study duration            | 48 weeks                                                                                                                                                                                                                                                                                                                                                                                                                                                                                                                                                    |
| Trial registration:       | NCT01928771                                                                                                                                                                                                                                                                                                                                                                                                                                                                                                                                                 |
| Study Population          | Participants: benralizumab 30 mg 4 weekly group, n=399; benralizumab 30 mg 8 weekly group, n=398; or placebo group, n=407<br>Eligibility criteria: $\geq 2$ exacerbations in the previous 12 months; ACQ-6 score $\geq 1.5$ at enrolment FEV1 $< 80\%$ (if 12-17 years old, $< 90\%$ ); maintenance treatment with high-dose ( $\geq 500$ $\mu\text{g}/\text{d}$ FP or equivalent) ICS/LABA for $\geq 12$ months for adults $> 18$ years, or at least medium-dose ( $\geq 250$ $\mu\text{g}/\text{d}$ FP or equivalent) ICS/LABA for children (12-17 years) |
| Setting                   | 374 sites in Australia, Brazil, Bulgaria, Czech Republic, France, Italy, Mexico, Peru, Poland, Russia, South Africa, South Korea, Spain, Turkey, the UK, the USA, and Vietnam                                                                                                                                                                                                                                                                                                                                                                               |
| Interventions             | SC benralizumab 30 mg/mL every 4 weeks or every 8 weeks versus placebo                                                                                                                                                                                                                                                                                                                                                                                                                                                                                      |
| Adherence reported yes/no | Yes                                                                                                                                                                                                                                                                                                                                                                                                                                                                                                                                                         |
| Primary outcomes          | Annual asthma exacerbation rate at week 48 weeks                                                                                                                                                                                                                                                                                                                                                                                                                                                                                                            |
| Secondary outcomes        | Prebronchodilator FEV1 and total asthma symptom score (a composite of daytime and night-time symptoms scored 0–6 overall) at week 48                                                                                                                                                                                                                                                                                                                                                                                                                        |

|                           |                                                                                                                                                                                                                                                                                                                                                                                                                                                                                                                              |
|---------------------------|------------------------------------------------------------------------------------------------------------------------------------------------------------------------------------------------------------------------------------------------------------------------------------------------------------------------------------------------------------------------------------------------------------------------------------------------------------------------------------------------------------------------------|
| Study reference           | Brightling (Tralokinumab) 2015                                                                                                                                                                                                                                                                                                                                                                                                                                                                                               |
| Study title               | Efficacy and safety of tralokinumab in patients with severe uncontrolled asthma: a randomised, double-blind, placebo-controlled, phase 2b trial                                                                                                                                                                                                                                                                                                                                                                              |
| Study duration            | 5-week screening and run-in period. 52 weeks                                                                                                                                                                                                                                                                                                                                                                                                                                                                                 |
| Trial registration:       | NCT01402986                                                                                                                                                                                                                                                                                                                                                                                                                                                                                                                  |
| Study Population          | Participants: tralokinumab 2 weekly group, n=150 or 4 weekly group, n=151 or placebo group, n=151<br>Eligibility criteria: patients of the age 18–75 years with severe uncontrolled asthma, consistent with the ERS/ATS definition, who were receiving high dose ICS (total daily dose >500 µg fluticasone dry powder inhaler or equivalent via metered dose inhaler) plus a LABA at least 30 days before visit 1 (run-in day –35), and who had at least two, but no more than six, exacerbations in the previous 12 months. |
| Setting                   | 98 sites in North America, South America, Europe, and Asia                                                                                                                                                                                                                                                                                                                                                                                                                                                                   |
| Interventions             | Placebo or tralokinumab administered subcutaneously either every 2 weeks to week 50, or every 2 weeks for 12 weeks followed by every 4 weeks to week 48                                                                                                                                                                                                                                                                                                                                                                      |
| Adherence reported yes/no | Yes                                                                                                                                                                                                                                                                                                                                                                                                                                                                                                                          |
| Primary outcomes          | Annual asthma exacerbation rate at week 52 weeks                                                                                                                                                                                                                                                                                                                                                                                                                                                                             |
| Secondary outcomes        | Change in FEV1, FVC, IC, and PEF, EQ-5D; at week 52                                                                                                                                                                                                                                                                                                                                                                                                                                                                          |

|                           |                                                                                                                                                                                                                                                                                                                                                                                                                                                                         |
|---------------------------|-------------------------------------------------------------------------------------------------------------------------------------------------------------------------------------------------------------------------------------------------------------------------------------------------------------------------------------------------------------------------------------------------------------------------------------------------------------------------|
| Study reference           | Brinke (IM triamcinolone) 2004                                                                                                                                                                                                                                                                                                                                                                                                                                          |
| Study title               | “Refractory” Eosinophilic Airway Inflammation in Severe Asthma Effect of Parenteral Corticosteroids                                                                                                                                                                                                                                                                                                                                                                     |
| Study duration            | 2 weeks                                                                                                                                                                                                                                                                                                                                                                                                                                                                 |
| Trial registration:       | Not specified                                                                                                                                                                                                                                                                                                                                                                                                                                                           |
| Study Population          | Participants: triamcinolone group, n= 22, placebo group, n=11<br>Eligibility criteria: patients of the age 21–73 years; clinically stable for at least 4 weeks; percentage sputum eosinophils above the upper limit of normal (2%); beclomethasone dose of 1,600–6,400 g/day or equivalent and LABA for more than 1 year and had had at least one (median, 4; range, 1–7) course of oral corticosteroids during the past year or 5 mg or more of oral prednisone daily. |
| Setting                   | Amsterdam and Netherlands                                                                                                                                                                                                                                                                                                                                                                                                                                               |
| Interventions             | One single intramuscular injection of 3 ml (40 mg/ml) long-acting triamcinolone acetonide (Kenacort-A40; Bristol-Myers Squibb, Woerden, The Netherlands) or matched placebo (3 ml NaCl 0.9%) was given.                                                                                                                                                                                                                                                                 |
| Adherence reported yes/no | No                                                                                                                                                                                                                                                                                                                                                                                                                                                                      |
| Primary outcomes          | Not specified                                                                                                                                                                                                                                                                                                                                                                                                                                                           |
| Secondary outcomes        | Sputum and peripheral blood eosinophil /neutrophil counts, FEV1, exhaled nitric oxide                                                                                                                                                                                                                                                                                                                                                                                   |

|                           |                                                                                                                                                                                                                                                                                                                                                                                                                                                                                                                                                                                                         |
|---------------------------|---------------------------------------------------------------------------------------------------------------------------------------------------------------------------------------------------------------------------------------------------------------------------------------------------------------------------------------------------------------------------------------------------------------------------------------------------------------------------------------------------------------------------------------------------------------------------------------------------------|
| Study reference           | Brusselle (Azithromycin) 2013                                                                                                                                                                                                                                                                                                                                                                                                                                                                                                                                                                           |
| Study title               | Azithromycin for prevention of exacerbations in severe asthma (AZISAST): a multicentre randomised double-blind placebo-controlled trial                                                                                                                                                                                                                                                                                                                                                                                                                                                                 |
| Study duration            | 2-week run-in period. 26 weeks                                                                                                                                                                                                                                                                                                                                                                                                                                                                                                                                                                          |
| Trial registration:       | NCT00760838                                                                                                                                                                                                                                                                                                                                                                                                                                                                                                                                                                                             |
| Study Population          | Participants: azithromycin group, n=55; placebo group, n=54<br>Eligibility criteria: patients of the age 18–75 years, with a diagnosis of persistent asthma, a history consistent with Global Initiative for Asthma step 4 or 5 clinical features, received high doses of inhaled corticosteroids ( $\geq 1000$ mg fluticasone or equivalent) plus inhaled long-acting $\beta_2$ agonists for at least 6 months prior to screening and had had at least two independent severe asthma exacerbations requiring systemic corticosteroids and/or LRTI requiring antibiotics within the previous 12 months. |
| Setting                   | Belgium                                                                                                                                                                                                                                                                                                                                                                                                                                                                                                                                                                                                 |
| Interventions             | Capsules with 250 mg azithromycin (prepared from capsules of Zitromax) or placebo. After randomisation, the patients took one capsule per day for 5 days and then one capsule three times a week.                                                                                                                                                                                                                                                                                                                                                                                                       |
| Adherence reported yes/no | Yes                                                                                                                                                                                                                                                                                                                                                                                                                                                                                                                                                                                                     |
| Primary outcomes          | The rate of severe asthma exacerbations and/or LRTI requiring antibiotics during the 26-week treatment phase                                                                                                                                                                                                                                                                                                                                                                                                                                                                                            |
| Secondary outcomes        | Pre- and post-bronchodilation FEV1 morning and evening peak expiratory flow (PEF), AQLQ score and (ACQ score). All secondary outcomes were ascertained at visits 2, 3, 4, 5 and 6 (at randomisation and weeks 4, 10, 18 and 26 of the treatment period), except for the questionnaires which were completed by the patient at visits 2, 4 and 6 only.                                                                                                                                                                                                                                                   |

|                           |                                                                                                                                                                                                                                                                                                                                                                                                                                                                                                                                                                                                                                                                                                                                                                                                                |
|---------------------------|----------------------------------------------------------------------------------------------------------------------------------------------------------------------------------------------------------------------------------------------------------------------------------------------------------------------------------------------------------------------------------------------------------------------------------------------------------------------------------------------------------------------------------------------------------------------------------------------------------------------------------------------------------------------------------------------------------------------------------------------------------------------------------------------------------------|
| Study reference           | Busse (Omalizumab) 2001                                                                                                                                                                                                                                                                                                                                                                                                                                                                                                                                                                                                                                                                                                                                                                                        |
| Study title               | Omalizumab, anti-IgE recombinant humanized monoclonal antibody, for the treatment of severe allergic asthma                                                                                                                                                                                                                                                                                                                                                                                                                                                                                                                                                                                                                                                                                                    |
| Study duration            | 4-6-week run-in period. 28 weeks                                                                                                                                                                                                                                                                                                                                                                                                                                                                                                                                                                                                                                                                                                                                                                               |
| Trial registration:       | Not specified                                                                                                                                                                                                                                                                                                                                                                                                                                                                                                                                                                                                                                                                                                                                                                                                  |
| Study Population          | Participants: Omalizumab group, n= 268; Placebo group, n=257<br>Eligibility criteria: patients of the age 12–75 years; Male or female symptomatic allergic asthmatics despite treatment with ICS; duration of asthma, $\geq 1$ year; positive immediate responses on skin prick testing to at least 1 common allergen, including <i>Dermatophagoides farinae</i> , <i>Dermatophagoides pteronyssinus</i> , cockroach (whole body), dog, or cat; total serum IgE $\geq 30$ IU/mL to $\leq 700$ IU/mL; FEV1 reversibility of $\geq 12\%$ within 30 minutes after administration of albuterol (90-180 $\mu$ g); baseline FEV1 $\geq 40\%$ and $\leq 80\%$ of predicted; and treatment with 420 to 840 $\mu$ g/day of beclomethasone dipropionate or its equivalent ICS for $\geq 3$ months prior to randomization |
| Setting                   | United States and United Kingdom                                                                                                                                                                                                                                                                                                                                                                                                                                                                                                                                                                                                                                                                                                                                                                               |
| Interventions             | Placebo or omalizumab administered subcutaneously every 2 or 4 weeks, depending on baseline IgE level and body weight.                                                                                                                                                                                                                                                                                                                                                                                                                                                                                                                                                                                                                                                                                         |
| Adherence reported yes/no | No                                                                                                                                                                                                                                                                                                                                                                                                                                                                                                                                                                                                                                                                                                                                                                                                             |
| Primary outcomes          | Number of exacerbation episodes experienced by a patient during the steroid reduction period (4 months) and during the stable steroid phase (3 months)                                                                                                                                                                                                                                                                                                                                                                                                                                                                                                                                                                                                                                                         |
| Secondary outcomes        | Number of patients experiencing at least 1 exacerbation; daily asthma symptoms; rescue medication use; pulmonary function; and global evaluation of treatment effectiveness( time frame at week 16 and week 28)                                                                                                                                                                                                                                                                                                                                                                                                                                                                                                                                                                                                |

|                           |                                                                                                                                                                                                                                                                                                                                                                                                                                                                                                                                                                           |
|---------------------------|---------------------------------------------------------------------------------------------------------------------------------------------------------------------------------------------------------------------------------------------------------------------------------------------------------------------------------------------------------------------------------------------------------------------------------------------------------------------------------------------------------------------------------------------------------------------------|
| Study reference           | Busse (Brodalumab) 2013                                                                                                                                                                                                                                                                                                                                                                                                                                                                                                                                                   |
| Study title               | Randomized, Double-Blind, Placebo-controlled Study of Brodalumab, a Human Anti-IL-17 Receptor Monoclonal Antibody, in Moderate to Severe Asthma                                                                                                                                                                                                                                                                                                                                                                                                                           |
| Study duration            | 4-week run-in period. 12 weeks                                                                                                                                                                                                                                                                                                                                                                                                                                                                                                                                            |
| Trial registration:       | NCT01199289                                                                                                                                                                                                                                                                                                                                                                                                                                                                                                                                                               |
| Study Population          | Participants: Brodalumab Q2W 140 mg group, n=74; 210 mg group, n= 76; 280 mg group, n =76; placebo group, n = 76<br>Eligibility criteria: patients of the age 18–65 years with inadequately controlled (ACQ $\geq$ 1.5, $\geq$ 50% to $\leq$ 80% predicted FEV1, and $\geq$ 12% reversibility over baseline FEV1 with SABA inhalation) physician diagnosed moderate to severe asthma on stable ICS (>200 and <1,000 mg/d of fluticasone powder or equivalent for >3 month before screening, and had to be on a stable dose for >30 days) with or without additional LABAs |
| Setting                   | 47 sites in 10 countries; Austria, Belgium, Canada, Finland, Hungary, Netherlands, Poland, Russia, South Korea, and the United States                                                                                                                                                                                                                                                                                                                                                                                                                                     |
| Interventions             | Brodalumab (140, 210, 280 mg) or placebo subcutaneously at day 1 and weeks 1, 2, 4, 6, 8, and 10                                                                                                                                                                                                                                                                                                                                                                                                                                                                          |
| Adherence reported yes/no | No                                                                                                                                                                                                                                                                                                                                                                                                                                                                                                                                                                        |
| Primary outcomes          | The total change in ACQ-7 score from baseline to Week 12                                                                                                                                                                                                                                                                                                                                                                                                                                                                                                                  |
| Secondary outcomes        | Changes from baseline to week 12 in pre- and post-bronchodilator FEV1, morning PEF, rescue SABA use, daily asthma symptom score, and symptom-free days                                                                                                                                                                                                                                                                                                                                                                                                                    |

|                           |                                                                                                                                                                                                                                                                                                                                                                                                                |
|---------------------------|----------------------------------------------------------------------------------------------------------------------------------------------------------------------------------------------------------------------------------------------------------------------------------------------------------------------------------------------------------------------------------------------------------------|
| Study reference           | Busse (Daclizumab) 2008                                                                                                                                                                                                                                                                                                                                                                                        |
| Study title               | Daclizumab Improves Asthma Control in Patients with Moderate to Severe Persistent Asthma A Randomized, Controlled Trial                                                                                                                                                                                                                                                                                        |
| Study duration            | 2-5 weeks run-in period. 20 weeks of treatment period and 16 weeks of follow up                                                                                                                                                                                                                                                                                                                                |
| Trial registration:       | NCT00028288                                                                                                                                                                                                                                                                                                                                                                                                    |
| Study Population          | Participants: Daclizumab group, n=88; placebo group, n= 27<br>Eligibility criteria: non-smoking adults with asthma; 18–70 years old; asthma history of 6 months or longer; FEV1 of 50–80% of predicted; reversibility of at least 12% with inhaled short-acting $\beta_2$ - agonist; at least 1,200 mg daily inhaled triamcinolone acetate acetonide (or equivalent ICS) for 3 months or more before enrolment |
| Setting                   | 24 centres in the United States                                                                                                                                                                                                                                                                                                                                                                                |
| Interventions             | Daclizumab (intravenous loading dose, 2 mg/kg, then 1 mg/kg) or placebo every 2 weeks, added to stable-dose triamcinolone acetate acetonide through week 12                                                                                                                                                                                                                                                    |
| Adherence reported yes/no | No                                                                                                                                                                                                                                                                                                                                                                                                             |
| Primary outcomes          | Percent change in FEV1 from randomization to day 84                                                                                                                                                                                                                                                                                                                                                            |
| Secondary outcomes        | Asthma exacerbations, time to asthma exacerbation, morning/evening PEF, rescue medication use, daytime/ night-time asthma symptoms, and asthma-free days from randomization to day 84                                                                                                                                                                                                                          |

|                           |                                                                                                                                                                                                                                                                                                                                                                                                                                                                                                                                                                                                                                                                                                                                                                                                                                  |
|---------------------------|----------------------------------------------------------------------------------------------------------------------------------------------------------------------------------------------------------------------------------------------------------------------------------------------------------------------------------------------------------------------------------------------------------------------------------------------------------------------------------------------------------------------------------------------------------------------------------------------------------------------------------------------------------------------------------------------------------------------------------------------------------------------------------------------------------------------------------|
| Study reference           | Busse (AMG 853) 2013                                                                                                                                                                                                                                                                                                                                                                                                                                                                                                                                                                                                                                                                                                                                                                                                             |
| Study title               | Safety and efficacy of the prostaglandin D2 receptor antagonist AMG 853 in asthmatic patients                                                                                                                                                                                                                                                                                                                                                                                                                                                                                                                                                                                                                                                                                                                                    |
| Study duration            | 4-weeks run-in period. 12 weeks                                                                                                                                                                                                                                                                                                                                                                                                                                                                                                                                                                                                                                                                                                                                                                                                  |
| Trial registration:       | Not documented                                                                                                                                                                                                                                                                                                                                                                                                                                                                                                                                                                                                                                                                                                                                                                                                                   |
| Study Population          | <p>Participants: 200 mg of AMG 853 n=80 ; 100 mg of AMG 853 n= 79; 25 mg of AMG 853, n= 79; 5 mg of AMG 853, n=80; placebo group, n= 79</p> <p>Eligibility criteria: patients of the age 18 to 65 years; moderate-to-severe asthma, with ongoing asthma symptoms {ACQ scores of <math>\geq 1.5</math> at screening and baseline, or FEV1 of <math>\geq 50\%</math> and <math>\leq 80\%</math> at screening, and at least 12% reversibility over baseline FEV1 with SABA; <math>\leq 8</math> puffs or nebulized equivalent (<math>\leq 2</math> treatments with 2.5 mg of albuterol)} and were receiving stable inhaled corticosteroids (ICSs; <math>\geq 200</math> and <math>\leq 1000</math> mg/day fluticasone or equivalent) for 30 or more days, with consecutive use for at least the prior 3 months before screening</p> |
| Setting                   | 73 centres in the United States, Canada, and Europe                                                                                                                                                                                                                                                                                                                                                                                                                                                                                                                                                                                                                                                                                                                                                                              |
| Interventions             | Oral placebo; 5, 25, or 100 mg of AMG 853 twice daily ; or 200 mg of AMG 853 once daily                                                                                                                                                                                                                                                                                                                                                                                                                                                                                                                                                                                                                                                                                                                                          |
| Adherence reported yes/no | No                                                                                                                                                                                                                                                                                                                                                                                                                                                                                                                                                                                                                                                                                                                                                                                                                               |
| Primary outcomes          | The change in ACQ symptom scores from baseline to week 12                                                                                                                                                                                                                                                                                                                                                                                                                                                                                                                                                                                                                                                                                                                                                                        |
| Secondary outcomes        | The change from baseline to week 12 in prebronchodilator and postbronchodilator FEV1 (percentage change), morning and evening PEF, frequency of rescue SABA use, daily asthma symptoms, AQLQ scores, and the proportion of symptom-free days over the treatment period. The incidence of asthma exacerbations was evaluated as an exploratory end point. Other exploratory end points included fraction of exhaled nitric oxide (FENO) and induced sputum eosinophil numbers (sub study). Blood eosinophil numbers and serum IgE levels                                                                                                                                                                                                                                                                                          |



|                           |                                                                                                                                                                                                                                                                                                                                                                                                                                                                                                                                                                                                                                        |
|---------------------------|----------------------------------------------------------------------------------------------------------------------------------------------------------------------------------------------------------------------------------------------------------------------------------------------------------------------------------------------------------------------------------------------------------------------------------------------------------------------------------------------------------------------------------------------------------------------------------------------------------------------------------------|
| Study reference           | Cahill (Imatinib) 2017                                                                                                                                                                                                                                                                                                                                                                                                                                                                                                                                                                                                                 |
| Study title               | KIT Inhibition by Imatinib in Patients with Severe Refractory Asthma                                                                                                                                                                                                                                                                                                                                                                                                                                                                                                                                                                   |
| Study duration            | 4-week run-in period. 24weeks                                                                                                                                                                                                                                                                                                                                                                                                                                                                                                                                                                                                          |
| Trial registration:       | NCT01097694                                                                                                                                                                                                                                                                                                                                                                                                                                                                                                                                                                                                                            |
| Study Population          | Participants: Imatinib group, n=32 ; placebo group n= 30<br>Eligibility criteria: patients of the age 18–55 years, diagnosed with asthma for at least 1 year; refractory asthmatics, defined as reporting that their asthma has not been completely controlled in the past 3 months despite continuous treatment with high dose ICS (fluticasone $\geq$ 1000 mg or equivalent) and LABA, with or without continuous OCS; uncontrolled asthma( ACQ $\geq$ 1.5 ) during the run-in period; FEV1 > 55% predicted; methacholine PC20 < 4 mg/ml; > 80% compliance with peak flow recording and diary completion during the screening period |
| Setting                   | 7 centres in the United States                                                                                                                                                                                                                                                                                                                                                                                                                                                                                                                                                                                                         |
| Interventions             | Imatinib or placebo once daily for 24 weeks. Imatinib treatment was initiated at an oral dose of 200 mg per day for 2 weeks, after which the dose was increased to 400 mg per day                                                                                                                                                                                                                                                                                                                                                                                                                                                      |
| Adherence reported yes/no | Yes                                                                                                                                                                                                                                                                                                                                                                                                                                                                                                                                                                                                                                    |
| Primary outcomes          | The change in airway hyperresponsiveness, assessed as PC20, from baseline to 3 and 6 months of therapy in the imatinib group as compared with the corresponding changes in the control group                                                                                                                                                                                                                                                                                                                                                                                                                                           |
| Secondary outcomes        | Airway physiological outcomes, computed tomography bronchial wall thickness and patient reported outcomes: (from baseline to 3 and 6 months): FEV1, morning and evening PEF, maximum FEV1 post-bronchodilator (FEV1 after 4-8 puffs albuterol), Adenosine Monophosphate (AMP), PC20, use of as needed rescue medication, ACQ scores, AQLQ, score, symptom free days, asthma exacerbations                                                                                                                                                                                                                                              |

|                           |                                                                                                                                                                                                                                                                                                                                                                                                                                                                                                                                                                                                                                              |
|---------------------------|----------------------------------------------------------------------------------------------------------------------------------------------------------------------------------------------------------------------------------------------------------------------------------------------------------------------------------------------------------------------------------------------------------------------------------------------------------------------------------------------------------------------------------------------------------------------------------------------------------------------------------------------|
| Study reference           | Castro (Bronchial thermoplasty) 2010                                                                                                                                                                                                                                                                                                                                                                                                                                                                                                                                                                                                         |
| Study title               | Effectiveness and Safety of Bronchial Thermoplasty in the Treatment of Severe Asthma A Multicentre, Randomized, Double-Blind, Sham-Controlled Clinical Trial                                                                                                                                                                                                                                                                                                                                                                                                                                                                                 |
| Study duration            | 52 weeks                                                                                                                                                                                                                                                                                                                                                                                                                                                                                                                                                                                                                                     |
| Trial registration:       | NCT00231114                                                                                                                                                                                                                                                                                                                                                                                                                                                                                                                                                                                                                                  |
| Study Population          | Participants: Bronchial thermoplasty (BT) group, n=190; sham group, n= 98<br>Eligibility criteria: adults (18–65 years of age) diagnosed with asthma who required regular maintenance medications of ICS (1,000 mg/d beclomethasone or equivalent) and LABA >100 mg/d salmeterol or equivalent) for at least 4 weeks before entry; baseline AQLQ score $\leq 6.25$ ; prebronchodilator FEV1 >60% of predicted, airway hyperresponsiveness (methacholine PC20 $\geq 8$ mg/ml), at least 2 days of asthma symptoms during the 4-week baseline period, and being a non-smoker for at least 1 year with less than 10 pack-years smoking history. |
| Setting                   | 30 investigational sites in six countries; United States, United Kingdom, Canada, Brazil, Netherlands, Australia                                                                                                                                                                                                                                                                                                                                                                                                                                                                                                                             |
| Interventions             | BT or the sham group. The bronchoscopy procedures were performed 3 weeks apart                                                                                                                                                                                                                                                                                                                                                                                                                                                                                                                                                               |
| Adherence reported yes/no | No                                                                                                                                                                                                                                                                                                                                                                                                                                                                                                                                                                                                                                           |
| Primary outcomes          | The difference between study groups in the AQLQ score change from baseline to the average of the 6-, 9-, and 12-month scores (integrated AQLQ)                                                                                                                                                                                                                                                                                                                                                                                                                                                                                               |
| Secondary outcomes        | ACQ scores, percentage of symptom-free days, symptom scores, morning PEF, rescue medication use, and FEV1, the numbers of severe asthma exacerbations, the percentage of subjects experiencing severe exacerbations, respiratory-related unscheduled physician office visits, emergency department (ED) visits, hospitalizations, and days missed from work/school or other activities due to asthma                                                                                                                                                                                                                                         |

|                           |                                                                                                                                                                                                                                                                                                                                                                                                                                                                                          |
|---------------------------|------------------------------------------------------------------------------------------------------------------------------------------------------------------------------------------------------------------------------------------------------------------------------------------------------------------------------------------------------------------------------------------------------------------------------------------------------------------------------------------|
| Study reference           | Castro (Benralizumab) 2014                                                                                                                                                                                                                                                                                                                                                                                                                                                               |
| Study title               | Benralizumab, an anti-interleukin 5 receptor $\alpha$ monoclonal antibody, versus placebo for uncontrolled eosinophilic asthma: a phase 2b randomised dose-ranging study                                                                                                                                                                                                                                                                                                                 |
| Study duration            | 52 weeks                                                                                                                                                                                                                                                                                                                                                                                                                                                                                 |
| Trial registration:       | NCT01238861                                                                                                                                                                                                                                                                                                                                                                                                                                                                              |
| Study Population          | Participants: 324 eosinophilic patients: benralizumab 2 mg dose, n=81; 20 mg dose, n=81; 100 mg dose, n=82; placebo group, n=80: 285 non-eosinophilic patients : 100 mg benralizumab n=142; placebo group, n=143<br>Eligibility criteria: 2–6 exacerbations in the previous 12 months, ACQ-6 score $\geq$ 1.5 at least twice during screening, morning pre-bronchodilator FEV1 40%–90% maintenance treatment with medium- to high-dose ICS in combination with LABA for $\geq$ 12 months |
| Setting                   | 33 sites in the United States, Canada, Bulgaria, Brazil, Peru, Mexico, Poland, Russia, Argentina, and Colombia                                                                                                                                                                                                                                                                                                                                                                           |
| Interventions             | 6 arms: benralizumab 2 mg or benralizumab 20 mg or benralizumab 100 mg or placebo delivered by 2 SC injections every 4 weeks for the first 3 doses (weeks 1, 4, and 8), then every 8 weeks (weeks 16, 24, 32, and 40)                                                                                                                                                                                                                                                                    |
| Adherence reported yes/no | No                                                                                                                                                                                                                                                                                                                                                                                                                                                                                       |
| Primary outcomes          | Asthma annual exacerbation rate in eosinophilic individuals, calculated as the total number of reported exacerbations in each group up to week 52 divided by the total duration of person-year follow-up in each group                                                                                                                                                                                                                                                                   |
| Secondary outcomes        | The change from baseline in FEV1, mean ACQ-6 score, overall symptom score, and mean AQLQ score at week 52. Exploratory endpoints included change in FeNO, and blood eosinophil counts                                                                                                                                                                                                                                                                                                    |

|                           |                                                                                                                                                                                                                                                                                                                                                                                                                                                                                                                   |
|---------------------------|-------------------------------------------------------------------------------------------------------------------------------------------------------------------------------------------------------------------------------------------------------------------------------------------------------------------------------------------------------------------------------------------------------------------------------------------------------------------------------------------------------------------|
| Study reference           | Castro (Reslizumab) 2015                                                                                                                                                                                                                                                                                                                                                                                                                                                                                          |
| Study title               | Reslizumab for inadequately controlled asthma with elevated blood eosinophil counts: results from two multicentre, parallel, double-blind, randomised, placebo-controlled, phase 3 trials                                                                                                                                                                                                                                                                                                                         |
| Study duration            | 48 weeks                                                                                                                                                                                                                                                                                                                                                                                                                                                                                                          |
| Trial registration:       | NCT01287039 (study 1) and NCT01285323 (study 2)                                                                                                                                                                                                                                                                                                                                                                                                                                                                   |
| Study Population          | Participants: Study 1; reslizumab group, n=245; placebo group, n=244<br>Study 2: reslizumab group n= 232; placebo group, n=232<br>Eligibility criteria: patients with moderate-severe asthma, ACQ-7 score $\geq 1.5$ ; maintenance treatment with medium-dose ICS (i.e. $\geq 440$ $\mu\text{g/d}$ FP or equivalent daily); $\pm$ additional controller or maintenance OCS and at least 1 exacerbation in the past 12 months); blood eosinophils $\geq 400$ cells/ $\mu\text{L}$ during 2-4 week screening period |
| Setting                   | 128 clinical research centres in study 1 and 104 centres in study 2 from Asia, Australia, North America, South America, South Africa, and Europe                                                                                                                                                                                                                                                                                                                                                                  |
| Interventions             | IV infusion of reslizumab 3 mg/kg or matching placebo every 4 weeks (13 doses with last dose in week 48)                                                                                                                                                                                                                                                                                                                                                                                                          |
| Adherence reported yes/no | No                                                                                                                                                                                                                                                                                                                                                                                                                                                                                                                |
| Primary outcomes          | The frequency of clinical asthma exacerbations per patient during the 52-week treatment period                                                                                                                                                                                                                                                                                                                                                                                                                    |
| Secondary outcomes        | The change from baseline in FEV1, ACQ-7 score,21,25 ASUI score, rescue use of short-acting $\beta$ -agonist, and blood eosinophil count to each scheduled visit; AQLQ total score were assessed at weeks 16, 32, and 52                                                                                                                                                                                                                                                                                           |

|                           |                                                                                                                                                                                                                                                                                                                                                                                                                                                                                                                                                                                                                                                                                                    |
|---------------------------|----------------------------------------------------------------------------------------------------------------------------------------------------------------------------------------------------------------------------------------------------------------------------------------------------------------------------------------------------------------------------------------------------------------------------------------------------------------------------------------------------------------------------------------------------------------------------------------------------------------------------------------------------------------------------------------------------|
| Study reference           | Castro (Reslizumab) 2011                                                                                                                                                                                                                                                                                                                                                                                                                                                                                                                                                                                                                                                                           |
| Study title               | Reslizumab for Poorly Controlled, Eosinophilic Asthma A Randomized, Placebo-controlled Study                                                                                                                                                                                                                                                                                                                                                                                                                                                                                                                                                                                                       |
| Study duration            | 15 weeks                                                                                                                                                                                                                                                                                                                                                                                                                                                                                                                                                                                                                                                                                           |
| Trial registration:       | Not documented                                                                                                                                                                                                                                                                                                                                                                                                                                                                                                                                                                                                                                                                                     |
| Study Population          | Participants: reslizumab group, n= 53; placebo group, n=53<br>Eligibility criteria: patients of the age 18–75 years with a diagnosis of asthma confirmed by airway hyperreactivity (a $\geq 20\%$ reduction in FEV1 after administration of methacholine up to 16 mg/ml) or by airway reversibility (a $> 12\%$ improvement in FEV1 after administration of a beta-agonist); treated with high-dose ICS ( $> 440$ mg of fluticasone twice per day) in combination with at least one other agent (including SABA, leukotriene antagonists, and cromolyn sodium); that was poorly controlled as indicated by an ACQ score of $\geq 1.5$ and associated with induced sputum eosinophils of $\geq 3\%$ |
| Setting                   | 25 sites in the United States and Canada                                                                                                                                                                                                                                                                                                                                                                                                                                                                                                                                                                                                                                                           |
| Interventions             | to infusions of reslizumab (3.0 mg/kg) or placebo (0.9% saline) at a 1:1 ratio at baseline and at Weeks 4, 8, and 12                                                                                                                                                                                                                                                                                                                                                                                                                                                                                                                                                                               |
| Adherence reported yes/no | No                                                                                                                                                                                                                                                                                                                                                                                                                                                                                                                                                                                                                                                                                                 |
| Primary outcomes          | The difference between the reslizumab and placebo groups in the change from baseline to end of therapy (Week 15 or early withdrawal) in the ACQ score                                                                                                                                                                                                                                                                                                                                                                                                                                                                                                                                              |
| Secondary outcomes        | Spirometry, blood and induced sputum eosinophil counts, and the percentage of patients with clinical asthma exacerbations                                                                                                                                                                                                                                                                                                                                                                                                                                                                                                                                                                          |

|                           |                                                                                                                                                                                                                                                                                                                                                                                                                                                                                                                                                                                                                                                                                                                                                                                                                                                                                                                                                                                                                                                                                                                                                                                                                                                                                                                                   |
|---------------------------|-----------------------------------------------------------------------------------------------------------------------------------------------------------------------------------------------------------------------------------------------------------------------------------------------------------------------------------------------------------------------------------------------------------------------------------------------------------------------------------------------------------------------------------------------------------------------------------------------------------------------------------------------------------------------------------------------------------------------------------------------------------------------------------------------------------------------------------------------------------------------------------------------------------------------------------------------------------------------------------------------------------------------------------------------------------------------------------------------------------------------------------------------------------------------------------------------------------------------------------------------------------------------------------------------------------------------------------|
| Study reference           | Chanez (Omalizumab) 2010                                                                                                                                                                                                                                                                                                                                                                                                                                                                                                                                                                                                                                                                                                                                                                                                                                                                                                                                                                                                                                                                                                                                                                                                                                                                                                          |
| Study title               | Omalizumab-induced decrease of Fc3RI expression in patients with severe allergic asthma                                                                                                                                                                                                                                                                                                                                                                                                                                                                                                                                                                                                                                                                                                                                                                                                                                                                                                                                                                                                                                                                                                                                                                                                                                           |
| Study duration            | 16 weeks                                                                                                                                                                                                                                                                                                                                                                                                                                                                                                                                                                                                                                                                                                                                                                                                                                                                                                                                                                                                                                                                                                                                                                                                                                                                                                                          |
| Trial registration:       | NCT00454051                                                                                                                                                                                                                                                                                                                                                                                                                                                                                                                                                                                                                                                                                                                                                                                                                                                                                                                                                                                                                                                                                                                                                                                                                                                                                                                       |
| Study Population          | <p>Participants: omalizumab group, n= 20; control group: n=11</p> <p>Eligibility criteria: adults aged <math>\geq 18</math> years; participants with severe persistent allergic asthma with the following characteristics: FEV1 &lt; 80% of predicted; frequent daily symptoms (<math>\geq</math> four days/week on average) or nocturnal awakening (<math>\geq</math> one/week on average); multiple severe asthma exacerbations: either <math>\geq</math> two severe asthma exacerbations requiring an unscheduled medical intervention with systemic corticosteroid in the past year, or hospitalisation (including emergency room treatment) for an asthma exacerbation in the past year, despite a high-dose ICS &gt; 1000 mg beclomethasone dipropionate or equivalent and LABA; an allergy to a perennial allergen demonstrated with convincing criteria {i.e. positive prick skin test or in vitro reactivity to a perennial aeroallergen (RAST)}; total serum IgE level <math>\geq 30</math> to <math>\leq 700</math> IU/mL and suitable serum total IgE level; weight according to Xolair dosing tablets</p>                                                                                                                                                                                                            |
| Setting                   | France                                                                                                                                                                                                                                                                                                                                                                                                                                                                                                                                                                                                                                                                                                                                                                                                                                                                                                                                                                                                                                                                                                                                                                                                                                                                                                                            |
| Interventions             | Omalizumab injected subcutaneously every two weeks or every four weeks for 16 weeks (dose and dosing interval determined on the basis of participant body weight and pre-treatment serum IgE level) versus placebo                                                                                                                                                                                                                                                                                                                                                                                                                                                                                                                                                                                                                                                                                                                                                                                                                                                                                                                                                                                                                                                                                                                |
| Adherence reported yes/no | No                                                                                                                                                                                                                                                                                                                                                                                                                                                                                                                                                                                                                                                                                                                                                                                                                                                                                                                                                                                                                                                                                                                                                                                                                                                                                                                                |
| Primary outcomes          | The change (%) from baseline in FcεRI (high-affinity IgE receptor) expression on blood basophils and dendritic cells after 16 weeks of treatment with omalizumab as compared with placebo (time frame: baseline and week 16); change (%) from baseline in mean fluorescence intensity of FcεRI after 16 weeks of treatment with omalizumab as compared with placebo (time frame: baseline and week 16)                                                                                                                                                                                                                                                                                                                                                                                                                                                                                                                                                                                                                                                                                                                                                                                                                                                                                                                            |
| Secondary outcomes        | <p>The change (%) from baseline in percent of basophils and dendritic cells expressing FcεRI after 4, 8, 12 and 16 weeks of treatment (time frame: baseline, weeks 4, 8, 12 and 16); change (%) from baseline in mean fluorescence intensity of FcεRI after 4, 8, 12 and 16 weeks of treatment (time frame: baseline, weeks 4, 8, 12 and 16); change from baseline in the number of days with asthma symptoms per week (time frame: baseline (four-week screening period before randomisation) and end of study (weeks 12 to 16)); change from baseline in the number of puffs of rescue medication per week (time frame: baseline (four-week screening period before randomisation) and end of study (weeks 12 to 16)); change from baseline in the number of nights with awakenings per week (time frame: baseline (four-week screening period before randomisation) and end of study (weeks 12 to 16)); change from baseline in the number of days with impairment in daily activities per week (time frame: baseline (four-week screening period before randomisation) and end of study (weeks 12 to 16)); change from baseline in the number of days with absence from school or work due to asthma symptoms (time frame: baseline (four-week screening period before randomisation) and end of study (weeks 12 to 16));</p> |

|  |                                                                                                                                                                                                                                                                                                                                                                                                                                                                                                                                                                                                                                           |
|--|-------------------------------------------------------------------------------------------------------------------------------------------------------------------------------------------------------------------------------------------------------------------------------------------------------------------------------------------------------------------------------------------------------------------------------------------------------------------------------------------------------------------------------------------------------------------------------------------------------------------------------------------|
|  | change from baseline in the number of days with hospitalisations (time frame: baseline (four-week screening period before randomisation) and end of study (weeks 12 to 16)); change from baseline in the number of unscheduled clinic visits (time frame: baseline (four-week screening period before randomisation) and end of study (weeks 12 to 16)); change from baseline in morning daily peak expiratory flow (PEF) (time frame: baseline (four-week screening period before randomisation) and end of study (weeks 12 to 16)); physician's overall assessment of treatment effectiveness (time frame: after 16 weeks of treatment) |
|--|-------------------------------------------------------------------------------------------------------------------------------------------------------------------------------------------------------------------------------------------------------------------------------------------------------------------------------------------------------------------------------------------------------------------------------------------------------------------------------------------------------------------------------------------------------------------------------------------------------------------------------------------|

|                           |                                                                                                                                                                                                                                                                                                                                                                                                                                                                                                                         |
|---------------------------|-------------------------------------------------------------------------------------------------------------------------------------------------------------------------------------------------------------------------------------------------------------------------------------------------------------------------------------------------------------------------------------------------------------------------------------------------------------------------------------------------------------------------|
| Study reference           | Corren (AMG 317) 2010                                                                                                                                                                                                                                                                                                                                                                                                                                                                                                   |
| Study title               | A Randomized, Controlled, Phase 2 Study of AMG 317, an IL-4Ra Antagonist, in Patients with Asthma                                                                                                                                                                                                                                                                                                                                                                                                                       |
| Study duration            | 16 weeks                                                                                                                                                                                                                                                                                                                                                                                                                                                                                                                |
| Trial registration:       | NCT 00436670                                                                                                                                                                                                                                                                                                                                                                                                                                                                                                            |
| Study Population          | Participants: AMG 317 75 mg group, n =73; AMG 317 150 mg group, n = 73; AMG 317 300 mg group, n =72 ; placebo group, n=74<br>Eligibility criteria: patients of the age 18-65 years, with moderate to severe asthma, and receiving stable doses of inhaled corticosteroids (ICS) (>200 to <1,000 mg/d fluticasone or equivalent; ACQ score $\geq 1.5$ , FEV1% predicted of $\geq 50\%$ to $\leq 80\%$ at screening, and greater than or equal to 12% reversibility over baseline FEV1 with $\beta_2$ -agonist inhalation |
| Setting                   | United States                                                                                                                                                                                                                                                                                                                                                                                                                                                                                                           |
| Interventions             | AMG 317 (75 mg, 150 mg, or 300 mg) or placebo subcutaneously once weekly for 12 weeks                                                                                                                                                                                                                                                                                                                                                                                                                                   |
| Adherence reported yes/no | No                                                                                                                                                                                                                                                                                                                                                                                                                                                                                                                      |
| Primary outcomes          | The change in ACQ symptom score from baseline to Week 12.                                                                                                                                                                                                                                                                                                                                                                                                                                                               |
| Secondary outcomes        | Changes in pre and post-bronchodilator FEV1, morning and evening PEF, diurnal and interday variation of PEF, rescue b-agonist use, and Asthma AQLQ score. Asthma exacerbations were also evaluated, and two definitions were used: (1) need for systemic steroids, or (2) need for systemic steroids or doubling of ICS dose                                                                                                                                                                                            |

|                           |                                                                                                                                                                                                                                                                                                                                                                                                                                                                                                                                                                                  |
|---------------------------|----------------------------------------------------------------------------------------------------------------------------------------------------------------------------------------------------------------------------------------------------------------------------------------------------------------------------------------------------------------------------------------------------------------------------------------------------------------------------------------------------------------------------------------------------------------------------------|
| Study reference           | Corren (Lebrikizumab) 2011                                                                                                                                                                                                                                                                                                                                                                                                                                                                                                                                                       |
| Study title               | Lebrikizumab Treatment in Adults with Asthma                                                                                                                                                                                                                                                                                                                                                                                                                                                                                                                                     |
| Study duration            | 2-week run in period. 32 weeks                                                                                                                                                                                                                                                                                                                                                                                                                                                                                                                                                   |
| Trial registration:       | NCT00930163                                                                                                                                                                                                                                                                                                                                                                                                                                                                                                                                                                      |
| Study Population          | Participants: lebrikizumab group, n=106; placebo group, n=112<br>Eligibility criteria: patients had asthma diagnosed by a physician { at least a 12% increase in the FEV1 after inhalation of a SABA, and prebronchodilator FEV1 between 40% and 80% (inclusive)}; the use for at least 6 months of inhaled glucocorticoids ( $\geq 200$ and $\leq 1000$ $\mu\text{g}$ of inhaled fluticasone propionate daily, administered by means of a dry powder inhaler, or a nominal equivalent); evidence of uncontrolled asthma ( $\text{ACQ-5} \geq 1.5$ ) on the day of randomization |
| Setting                   | United States                                                                                                                                                                                                                                                                                                                                                                                                                                                                                                                                                                    |
| Interventions             | Lebrikizumab 250 mg or placebo was given subcutaneously once a month for a total of 6 months                                                                                                                                                                                                                                                                                                                                                                                                                                                                                     |
| Adherence reported yes/no | Yes                                                                                                                                                                                                                                                                                                                                                                                                                                                                                                                                                                              |
| Primary outcomes          | The relative change in prebronchodilator FEV1 from baseline to week 12.                                                                                                                                                                                                                                                                                                                                                                                                                                                                                                          |
| Secondary outcomes        | Rates of protocol- defined exacerbations and severe exacerbations through week 24, morning prebronchodilator peak expiratory flow, change in ACQ5 score from baseline to week 12, asthma symptom score as assessed by means of the ACDD, and use of rescue medication                                                                                                                                                                                                                                                                                                            |



|                           |                                                                                                                                                                                                                  |
|---------------------------|------------------------------------------------------------------------------------------------------------------------------------------------------------------------------------------------------------------|
| Study reference           | Corren (Reslizumab) 2016                                                                                                                                                                                         |
| Study title               | Phase 3 Study of Reslizumab in Patients With Poorly Controlled Asthma Effects Across a Broad Range of Eosinophil Counts                                                                                          |
| Study duration            | 3-week screening period. 28 weeks                                                                                                                                                                                |
| Trial registration:       | NCT01508936                                                                                                                                                                                                      |
| Study Population          | Participants: reslizumab group, n=398; placebo group, n=98<br>Eligibility criteria: patients with moderate-severe asthma, inadequately controlled (ACQ-7 $\geq$ 1.5); maintenance treatment with medium-dose ICS |
| Setting                   | 66 sites across the United States                                                                                                                                                                                |
| Interventions             | Reslizumab 3.0 mg/kg was given intravenously or placebo once every 4 weeks (total of 4 doses)                                                                                                                    |
| Adherence reported yes/no | No                                                                                                                                                                                                               |
| Primary outcomes          | The change in FEV1 from baseline to week 16                                                                                                                                                                      |
| Secondary outcomes        | ACQ-7 score <sup>14</sup> ; rescue (SABA) use within the previous 3 days (assessed using 3-day recall at scheduled visits); FVC; and blood eosinophils (standard complete blood count) from baseline to week 16  |

|                           |                                                                                                                                                                                                                                                                                                                                                                                                                                                                                                                                                                                                                                                                                                                                                                                       |
|---------------------------|---------------------------------------------------------------------------------------------------------------------------------------------------------------------------------------------------------------------------------------------------------------------------------------------------------------------------------------------------------------------------------------------------------------------------------------------------------------------------------------------------------------------------------------------------------------------------------------------------------------------------------------------------------------------------------------------------------------------------------------------------------------------------------------|
| Study reference           | Cox (Bronchial thermoplasty) 2007                                                                                                                                                                                                                                                                                                                                                                                                                                                                                                                                                                                                                                                                                                                                                     |
| Study title               | Asthma Control during the Year after Bronchial Thermoplasty                                                                                                                                                                                                                                                                                                                                                                                                                                                                                                                                                                                                                                                                                                                           |
| Study duration            | 52 weeks                                                                                                                                                                                                                                                                                                                                                                                                                                                                                                                                                                                                                                                                                                                                                                              |
| Trial registration:       | NCT00214526                                                                                                                                                                                                                                                                                                                                                                                                                                                                                                                                                                                                                                                                                                                                                                           |
| Study Population          | <p>Participants: Bronchial thermoplasty (BT) group, n=56, control group n=56</p> <p>Eligibility criteria: patients aged 18–65 years of age; moderate or severe persistent asthma, defined according to the GINA guidelines, requiring daily therapy with ICS equivalent to a dose of 200 µg or more of beclomethasone and LABA, at a dose of 100 µg or more of salmeterol (Serevent, GlaxoSmithKline) or the equivalent, to maintain reasonable asthma control; airflow obstruction, assessed as a prebronchodilator FEV1 of 60 to 85% of the predicted value, and airway hyperresponsiveness, defined by a provocative concentration of methacholine required to lower the FEV1 by 20% (PC20) of less than 8 mg/mL, as well as stable asthma during the 6 weeks before enrolment</p> |
| Setting                   | 11 centres in four countries; Canada, Brazil, UK and Denmark                                                                                                                                                                                                                                                                                                                                                                                                                                                                                                                                                                                                                                                                                                                          |
| Interventions             | The BT group underwent three bronchoscopy procedures performed with the use of the Altair system (Asthmatx) at intervals of approximately 3 weeks. Control subjects had three treatment visits at intervals of 3 weeks for clinical review and spirometric assessment and received a systemic corticosteroid similar to that administered to subjects in the BT group                                                                                                                                                                                                                                                                                                                                                                                                                 |
| Adherence reported yes/no | No                                                                                                                                                                                                                                                                                                                                                                                                                                                                                                                                                                                                                                                                                                                                                                                    |
| Primary outcomes          | The difference between the two groups in the change in the rate of mild exacerbations between baseline and later time point                                                                                                                                                                                                                                                                                                                                                                                                                                                                                                                                                                                                                                                           |
| Secondary outcomes        | ACQ, PEF, AQLQ                                                                                                                                                                                                                                                                                                                                                                                                                                                                                                                                                                                                                                                                                                                                                                        |

|                           |                                                                                                                                                                                                                                                                                                                                                                                                                                                                                                                                                                                                                                   |
|---------------------------|-----------------------------------------------------------------------------------------------------------------------------------------------------------------------------------------------------------------------------------------------------------------------------------------------------------------------------------------------------------------------------------------------------------------------------------------------------------------------------------------------------------------------------------------------------------------------------------------------------------------------------------|
| Study reference           | Coyle (Bosentan) 2013                                                                                                                                                                                                                                                                                                                                                                                                                                                                                                                                                                                                             |
| Study title               | The Effect of the Endothelin-1 Receptor Antagonist, Bosentan, on Patients with Poorly Controlled Asthma: A 17-week, Double-Blind, Placebo-Controlled Crossover Pilot Study                                                                                                                                                                                                                                                                                                                                                                                                                                                        |
| Study duration            | 7-10-day run-in period. 16weeks                                                                                                                                                                                                                                                                                                                                                                                                                                                                                                                                                                                                   |
| Trial registration:       | Not documented                                                                                                                                                                                                                                                                                                                                                                                                                                                                                                                                                                                                                    |
| Study Population          | Participants: Bosentan group, n= 4 ; placebo group n= 3<br>Eligibility criteria: patients aged 21–70 years with a history of asthma, previously maintained on anti-inflammatory and long acting bronchodilator therapy (excluding tiotropium bromide), with a baseline FEV1% predicted of 40–70% and a minimum of 12% reversibility of FEV1 (after administration of albuterol) documented within the prior 2 years; poorly controlled asthma defined as symptoms including wheezing, chest tightness, or shortness of breath occurring at least three times a week or requiring use of “rescue” SABA at least three times a week |
| Setting                   | United States                                                                                                                                                                                                                                                                                                                                                                                                                                                                                                                                                                                                                     |
| Interventions             | Bosentan 62.5 mg twice daily for 4 weeks (Tracleer®, Actelion Pharmaceuticals, California, USA) followed by the therapeutic dose of bosentan 125 mg twice daily for an additional 4 weeks or identical shape and size placebo (crossover pilot study)                                                                                                                                                                                                                                                                                                                                                                             |
| Adherence reported yes/no | No                                                                                                                                                                                                                                                                                                                                                                                                                                                                                                                                                                                                                                |
| Primary outcomes          | The change in mean daily asthma symptom score between baseline and during the last week of bosentan 125 mg                                                                                                                                                                                                                                                                                                                                                                                                                                                                                                                        |
| Secondary outcomes        | The change in ACT, change in FEV1 after therapy, albuterol use during the last week of therapy, and acute bronchodilator effect of bosentan as assessed by measuring change in FEV1 after bosentan 125 mg                                                                                                                                                                                                                                                                                                                                                                                                                         |

|                           |                                                                                                                                                                                                                                                                                                                                                                                                                                                                                 |
|---------------------------|---------------------------------------------------------------------------------------------------------------------------------------------------------------------------------------------------------------------------------------------------------------------------------------------------------------------------------------------------------------------------------------------------------------------------------------------------------------------------------|
| Study reference           | DeBoever (GSK679586) 2014                                                                                                                                                                                                                                                                                                                                                                                                                                                       |
| Study title               | Efficacy and safety of an anti-IL-13 mAb in patients with severe asthma: A randomized trial                                                                                                                                                                                                                                                                                                                                                                                     |
| Study duration            | 4-week run-in period. 24weeks                                                                                                                                                                                                                                                                                                                                                                                                                                                   |
| Trial registration:       | NCT00843193                                                                                                                                                                                                                                                                                                                                                                                                                                                                     |
| Study Population          | Participants: GSK679586 group, n=599; placebo group, n=599<br>Eligibility criteria: patients of the age 18 to 75 years with severe asthma, symptomatic (ACQ-7 score 1.5) while receiving $\geq 500\mu\text{g/day}$ fluticasone propionate or equivalent (FPE) and had a prebronchodilator FEV1 of 35% to 80% of predicted normal value with $\geq 12\%$ reversibility on $\beta$ -2-agonist inhalation; LABAs or OCSs ( $\leq 25$ mg/d prednisolone or equivalent) were allowed |
| Setting                   | 34 sites across 8 countries including United Kingdom and United States                                                                                                                                                                                                                                                                                                                                                                                                          |
| Interventions             | 10 mg/kg GSK679586 intravenously or normal saline at day 1, week 4, and week 8                                                                                                                                                                                                                                                                                                                                                                                                  |
| Adherence reported yes/no | No                                                                                                                                                                                                                                                                                                                                                                                                                                                                              |
| Primary outcomes          | The change from baseline in ACQ-7 score over 12 weeks                                                                                                                                                                                                                                                                                                                                                                                                                           |
| Secondary outcomes        | The changes from baseline in free and total serum IL-13 levels, serum total IgE levels, and blood eosinophil counts were evaluated over the same time period as exploratory end points                                                                                                                                                                                                                                                                                          |

|                           |                                                                                                                                                                                                                                                                                                                                                                                                                                                                                                                                                                                                                                                                                             |
|---------------------------|---------------------------------------------------------------------------------------------------------------------------------------------------------------------------------------------------------------------------------------------------------------------------------------------------------------------------------------------------------------------------------------------------------------------------------------------------------------------------------------------------------------------------------------------------------------------------------------------------------------------------------------------------------------------------------------------|
| Study reference           | Dente (Prednisolone) 2010                                                                                                                                                                                                                                                                                                                                                                                                                                                                                                                                                                                                                                                                   |
| Study title               | Effects of oral prednisone on sputum eosinophils and cytokines in patients with severe refractory asthma                                                                                                                                                                                                                                                                                                                                                                                                                                                                                                                                                                                    |
| Study duration            | 2 weeks                                                                                                                                                                                                                                                                                                                                                                                                                                                                                                                                                                                                                                                                                     |
| Trial registration:       | Not documented                                                                                                                                                                                                                                                                                                                                                                                                                                                                                                                                                                                                                                                                              |
| Study Population          | Participants: prednisone group, n=39; placebo group, n=20<br>Eligibility criteria: compliance with functional measurements and treatment, acceptable sputum samples, and no contraindications for the use of systemic corticosteroids; symptomatic asthma and a history of airway obstruction reversibility (a 12% increase in FEV1 of baseline value after 400 g of salbutamol); treated with 1,600 to 3,200 g/day of inhaled beclomethasone propionate or equivalent associated with LABA in the year preceding the study, ±additional controller therapy (oral leukotriene receptor antagonists, inhaled anticholinergics, oral theophylline, and regular low-dose oral corticosteroids) |
| Setting                   | Italy                                                                                                                                                                                                                                                                                                                                                                                                                                                                                                                                                                                                                                                                                       |
| Interventions             | Oral prednisone (0.5 mg/kg daily) or placebo for 2 weeks, in addition to current regular treatment                                                                                                                                                                                                                                                                                                                                                                                                                                                                                                                                                                                          |
| Adherence reported yes/no | Yes                                                                                                                                                                                                                                                                                                                                                                                                                                                                                                                                                                                                                                                                                         |
| Primary outcomes          | Outcomes: FEV1, PEFr, sputum eosinophil, sputum IL-5 and IL-8 level at 2weeks                                                                                                                                                                                                                                                                                                                                                                                                                                                                                                                                                                                                               |
| Secondary outcomes        | Not specified                                                                                                                                                                                                                                                                                                                                                                                                                                                                                                                                                                                                                                                                               |

|                           |                                                                                                                                                                                                                                                                                                                            |
|---------------------------|----------------------------------------------------------------------------------------------------------------------------------------------------------------------------------------------------------------------------------------------------------------------------------------------------------------------------|
| Study reference           | Erin (Infliximab) 2006                                                                                                                                                                                                                                                                                                     |
| Study title               | The Effects of a Monoclonal Antibody Directed against Tumor Necrosis Factor-<br>in Asthma                                                                                                                                                                                                                                  |
| Study duration            | 2–4-week run-in period. 12 weeks                                                                                                                                                                                                                                                                                           |
| Trial registration:       | Not documented                                                                                                                                                                                                                                                                                                             |
| Study Population          | Participants: infliximab group, n=18; placebo group, n=20<br>Eligibility criteria: a mean total daily symptom score of at least 4 in the last 7 d of the run-in period (baseline period: Days 7 to 1), or at least 10% but less than 40% diurnal variation in peak PEF measured on at least 2 of 7 days in the same period |
| Setting                   | United Kingdom                                                                                                                                                                                                                                                                                                             |
| Interventions             | Infliximab (5 mg/kg) or placebo at Weeks 0 (Day 1), 2 (Day 15), and 6 (Day 43)                                                                                                                                                                                                                                             |
| Adherence reported yes/no | No                                                                                                                                                                                                                                                                                                                         |
| Primary outcomes          | The change from baseline (Days 7 to 1) to Week 8 (Days 50 to 56) in mean morning PEF, obtained from the patient diary data in the per protocol population                                                                                                                                                                  |
| Secondary outcomes        | The change from baseline (Days 7 to 1) to Week 8 (Days 50 to 56) in FEV1, asthma symptom scores, use of rescue SABA                                                                                                                                                                                                        |

|                           |                                                                                                                                                                                                                                                                                                                                                                                                                                                                                                                                                                                                  |
|---------------------------|--------------------------------------------------------------------------------------------------------------------------------------------------------------------------------------------------------------------------------------------------------------------------------------------------------------------------------------------------------------------------------------------------------------------------------------------------------------------------------------------------------------------------------------------------------------------------------------------------|
| Study reference           | Fernandes (Prednisolone) 2014                                                                                                                                                                                                                                                                                                                                                                                                                                                                                                                                                                    |
| Study title               | Bronchodilator response as a hallmark of uncontrolled asthma: a randomised clinical trial                                                                                                                                                                                                                                                                                                                                                                                                                                                                                                        |
| Study duration            | 10±5-day run-in period. 15± 5 days                                                                                                                                                                                                                                                                                                                                                                                                                                                                                                                                                               |
| Trial registration:       | NCT00597064                                                                                                                                                                                                                                                                                                                                                                                                                                                                                                                                                                                      |
| Study Population          | Participants: prednisolone group, n= 36; placebo group, n=35<br>Eligibility criteria: patients over 15 years old; non-smokers or ex-smokers (less than 5 packs/year); treated with ICS therapy (400 mcg Budesonide) plus LABA (12 mcg Formoterol) twice daily for at least 3 months (step 4 of GINA), exhibiting positive bronchodilator response ( $\geq 12\%$ increase in post-bronchodilator FEV1 value compared to pre bronchodilator FEV1 value, and an increase in the absolute value of FEV1 of greater than 200 mL at the screening visit (V0), and controlled asthma by ACQ5 definition |
| Setting                   | Brazil                                                                                                                                                                                                                                                                                                                                                                                                                                                                                                                                                                                           |
| Interventions             | Prednisone 40 mg daily or placebo for 2 weeks                                                                                                                                                                                                                                                                                                                                                                                                                                                                                                                                                    |
| Adherence reported yes/no | No                                                                                                                                                                                                                                                                                                                                                                                                                                                                                                                                                                                               |
| Primary outcomes          |                                                                                                                                                                                                                                                                                                                                                                                                                                                                                                                                                                                                  |
| Secondary outcomes        | Outcomes assessed: the change in FEV1, PEFr, sputum eosinophils and neutrophil counts at the final evaluation visit                                                                                                                                                                                                                                                                                                                                                                                                                                                                              |

|                           |                                                                                                                                                                                                                                                                                                                                                                                                                                                                                                                                                                                                                                                                                                                                                                                                                                                                                                                                                                                                                                                                                                                                                                                              |
|---------------------------|----------------------------------------------------------------------------------------------------------------------------------------------------------------------------------------------------------------------------------------------------------------------------------------------------------------------------------------------------------------------------------------------------------------------------------------------------------------------------------------------------------------------------------------------------------------------------------------------------------------------------------------------------------------------------------------------------------------------------------------------------------------------------------------------------------------------------------------------------------------------------------------------------------------------------------------------------------------------------------------------------------------------------------------------------------------------------------------------------------------------------------------------------------------------------------------------|
| Study reference           | FitzGerald (Benralizumab) 2016                                                                                                                                                                                                                                                                                                                                                                                                                                                                                                                                                                                                                                                                                                                                                                                                                                                                                                                                                                                                                                                                                                                                                               |
| Study title               | Reslizumab for inadequately controlled asthma with elevated blood eosinophil counts: results from two multicentre, parallel, double-blind, randomised, placebo-controlled, phase 3 trials                                                                                                                                                                                                                                                                                                                                                                                                                                                                                                                                                                                                                                                                                                                                                                                                                                                                                                                                                                                                    |
| Study duration            | 56 weeks (final follow-up at 60 weeks).                                                                                                                                                                                                                                                                                                                                                                                                                                                                                                                                                                                                                                                                                                                                                                                                                                                                                                                                                                                                                                                                                                                                                      |
| Trial registration:       | NCT01287039 (study 1) and NCT01285323 (study 2)                                                                                                                                                                                                                                                                                                                                                                                                                                                                                                                                                                                                                                                                                                                                                                                                                                                                                                                                                                                                                                                                                                                                              |
| Study Population          | <p>Participants: 1306 participants enrolled. Allocation: eosinophil <math>\geq 300</math> cells per <math>\mu\text{L}</math> benralizumab 30 mg every four weeks, n=241; eosinophil <math>\geq 300</math> cells per <math>\mu\text{L}</math> benralizumab 30 mg Q8W, n=239; eosinophil <math>\geq 300</math> cells per <math>\mu\text{L}</math> placebo group, n= 248; eosinophil <math>&lt; 300</math> cells per <math>\mu\text{L}</math> benralizumab 30 mg every four weeks, n=116; eosinophil <math>&lt; 300</math> cells per <math>\mu\text{L}</math> benralizumab 30 mg Q8W, n=125; eosinophil <math>&lt; 300</math> cells per <math>\mu\text{L}</math>; placebo group, n=122</p> <p>Eligibility criteria: patients with moderate-severe asthma; <math>\geq 2</math> exacerbations in the previous 12 months; ACQ-6 score <math>\geq 1.5</math> at enrolment; FEV1 <math>&lt; 80\%</math>; maintenance treatment with medium- (<math>\geq 250</math> <math>\mu\text{g/day}</math> FP or equivalent) to high-dose (<math>\geq 500</math> <math>\mu\text{g/day}</math> FP or equivalent) ICS/LABA for <math>\geq 12</math> months; high-dose ICS/LABA for <math>\geq 3</math> months</p> |
| Setting                   | 303 clinical research centres in the United States, Canada, Germany, Sweden, Poland, Romania, Ukraine, Argentina, Chile, Japan, and the Philippines                                                                                                                                                                                                                                                                                                                                                                                                                                                                                                                                                                                                                                                                                                                                                                                                                                                                                                                                                                                                                                          |
| Interventions             | Placebo or benralizumab 30 mg administered subcutaneously every 4 weeks for 56 weeks or every 4 weeks for 3 doses then 8 weeks thereafter for 56 weeks                                                                                                                                                                                                                                                                                                                                                                                                                                                                                                                                                                                                                                                                                                                                                                                                                                                                                                                                                                                                                                       |
| Adherence reported yes/no | Yes                                                                                                                                                                                                                                                                                                                                                                                                                                                                                                                                                                                                                                                                                                                                                                                                                                                                                                                                                                                                                                                                                                                                                                                          |
| Primary outcomes          | The frequency of clinical asthma exacerbations per patient during the 52-week treatment period, with events adjudicated by an independent review committee                                                                                                                                                                                                                                                                                                                                                                                                                                                                                                                                                                                                                                                                                                                                                                                                                                                                                                                                                                                                                                   |
| Secondary outcomes        | The pre-bronchodilator FEV1 and total asthma symptom score for patients receiving high-dosage ICS plus LABA with baseline blood eosinophils $\geq 300$ cells per $\mu\text{L}$ , time to first asthma exacerbation; annual rate of asthma exacerbations associated with an emergency department visit, urgent care visit, or admission to hospital; post-bronchodilator FEV1; ACQ-6 score; and AQLQ score.                                                                                                                                                                                                                                                                                                                                                                                                                                                                                                                                                                                                                                                                                                                                                                                   |



|                           |                                                                                                                                                                                                                                                                                                                                                                                                                                                                                                                                                                         |
|---------------------------|-------------------------------------------------------------------------------------------------------------------------------------------------------------------------------------------------------------------------------------------------------------------------------------------------------------------------------------------------------------------------------------------------------------------------------------------------------------------------------------------------------------------------------------------------------------------------|
| Study reference           | Flood-Page (Mepolizumab) 2007                                                                                                                                                                                                                                                                                                                                                                                                                                                                                                                                           |
| Study title               | A Study to Evaluate Safety and Efficacy of Mepolizumab in Patients with Moderate Persistent Asthma                                                                                                                                                                                                                                                                                                                                                                                                                                                                      |
| Study duration            | 4-week run-in period. 12 weeks treatment period and 8 weeks follow up period                                                                                                                                                                                                                                                                                                                                                                                                                                                                                            |
| Trial registration:       | Not documented                                                                                                                                                                                                                                                                                                                                                                                                                                                                                                                                                          |
| Study Population          | <p>Participants: mepolizumab 750mg group n=116 ; mepolizumab 250mg group, n=120 ; placebo group, n=126</p> <p>Eligibility criteria: non-smoking patients, aged 18–55 years, with asthma managed with ICS (maximum dose of beclomethasone dipropionate [BDP] or equivalent, 1,000 mg/d); FEV1% predicted of at least 50% and not &gt;80% with documented b2-agonist reversibility of at least 12% after administration of 180 mg of albuterol (salbutamol);daily symptom score of at least 4 (maximum score, 12) during the 7 days preceding the baseline assessment</p> |
| Setting                   | 55 centres in five countries; France, Germany, the Netherlands, the United Kingdom, and the United States                                                                                                                                                                                                                                                                                                                                                                                                                                                               |
| Interventions             | Mepolizumab (750 mg), mepolizumab (250 mg), or placebo                                                                                                                                                                                                                                                                                                                                                                                                                                                                                                                  |
| Adherence reported yes/no | No                                                                                                                                                                                                                                                                                                                                                                                                                                                                                                                                                                      |
| Primary outcomes          | The change from baseline in domiciliary morning PEF recorded at weeks 12 and 20                                                                                                                                                                                                                                                                                                                                                                                                                                                                                         |
| Secondary outcomes        | The changes from baseline of FEV1, asthma summary symptom scores (the total of the daytime asthma, night-time asthma, and morning asthma scores), use of rescue medication such as albuterol (salbutamol), quality of life scores, asthma exacerbation rates, and eosinophil counts in blood and sputum                                                                                                                                                                                                                                                                 |

|                           |                                                                                                                                                                                                                                |
|---------------------------|--------------------------------------------------------------------------------------------------------------------------------------------------------------------------------------------------------------------------------|
| Study reference           | Gao J-M (Montelukast) 2013                                                                                                                                                                                                     |
| Study title               | Montelukast improves air trapping, not airway remodelling, in patients with moderate-to-severe asthma: a pilot study                                                                                                           |
| Study duration            | 2-week run-in period. 24 weeks                                                                                                                                                                                                 |
| Trial registration:       | NCT00699062                                                                                                                                                                                                                    |
| Study Population          | Participants: salmeterol/fluticasone(SFC) plus Montelukast (SFC+M) group, n=19; salmeterol/fluticasone group, n=19<br>Eligibility criteria: patients of the age 16–65 years; FEV1 60%–80% predicted or less than 60% predicted |
| Setting                   | Beijing, China                                                                                                                                                                                                                 |
| Interventions             | Salmeterol/fluticasone (SFC) alone<br>or SFC plus Montelukast (SFC+M)                                                                                                                                                          |
| Adherence reported yes/no | No                                                                                                                                                                                                                             |
| Primary outcomes          | The difference in the variables of small airways between the SFC group and SFC+M group after 24 weeks of treatment                                                                                                             |
| Secondary outcomes        | FEV1, FEV1% predicted FEV1/FVC), air trapping expressed by RV/TLC at 24 weeks with SFC alone or SFC+M                                                                                                                          |

|                           |                                                                                                                                                                                                                                                                                                                                                                                                                                                                                                                                                                                      |
|---------------------------|--------------------------------------------------------------------------------------------------------------------------------------------------------------------------------------------------------------------------------------------------------------------------------------------------------------------------------------------------------------------------------------------------------------------------------------------------------------------------------------------------------------------------------------------------------------------------------------|
| Study reference           | Garcia (Omalizumab) 2013                                                                                                                                                                                                                                                                                                                                                                                                                                                                                                                                                             |
| Study title               | A Proof-of-Concept, Randomized, Controlled Trial of Omalizumab in Patients with Severe, Difficult-to-Control, Nonatopic Asthma                                                                                                                                                                                                                                                                                                                                                                                                                                                       |
| Study duration            | 2-week screening period. 16 weeks                                                                                                                                                                                                                                                                                                                                                                                                                                                                                                                                                    |
| Trial registration:       | NCT01007149                                                                                                                                                                                                                                                                                                                                                                                                                                                                                                                                                                          |
| Study Population          | Participants: omalizumab group, n= 20; placebo group, n=21<br>Eligibility criteria: patients aged 18 to 70 years with severe, persistent, nonatopic asthma that was uncontrolled according to the GINA guidelines despite daily high-dose ICS treatment (1,000 mg beclomethasone dipropionate or equivalent per day) plus a LABA with or without maintenance oral corticosteroid; at least two exacerbations requiring systemic corticosteroids, at least one hospitalization or ED visit in the year prior to randomization, or both; total serum IgE levels range: 30 to 700 IU/mL |
| Setting                   | 10 centres in France                                                                                                                                                                                                                                                                                                                                                                                                                                                                                                                                                                 |
| Interventions             | Omalizumab or placebo subcutaneously every 2 weeks                                                                                                                                                                                                                                                                                                                                                                                                                                                                                                                                   |
| Adherence reported yes/no | No                                                                                                                                                                                                                                                                                                                                                                                                                                                                                                                                                                                   |
| Primary outcomes          | The change from baseline in FcεRI expression on basophils and pDC2s at 16 weeks.                                                                                                                                                                                                                                                                                                                                                                                                                                                                                                     |
| Secondary outcomes        | Lung function, asthma control questionnaire scores, physician and patient global evaluation of treatment effectiveness (GETE), asthma exacerbation rates, and fraction of exhaled nitric oxide at 16 weeks                                                                                                                                                                                                                                                                                                                                                                           |

|                           |                                                                                                                                                                                                                                                                                                                                     |
|---------------------------|-------------------------------------------------------------------------------------------------------------------------------------------------------------------------------------------------------------------------------------------------------------------------------------------------------------------------------------|
| Study reference           | Gevaert (Omalizumab) 2013                                                                                                                                                                                                                                                                                                           |
| Study title               | Omalizumab is effective in allergic and nonallergic patients with nasal polyps and asthma                                                                                                                                                                                                                                           |
| Study duration            | 2-week screening period. 16 weeks                                                                                                                                                                                                                                                                                                   |
| Trial registration:       | Not specified                                                                                                                                                                                                                                                                                                                       |
| Study Population          | Participants: Omalizumab group, n=16; placebo group, n=8<br>Eligibility criteria: patients aged $\geq 18$ years with CRSwNP (according to the European Position: Paper on Rhinosinusitis and Nasal Polyps guidelines) and comorbid asthma (based on GINA guidelines and diagnosed by a respiratory physician) for more than 2 years |
| Setting                   | Belgium                                                                                                                                                                                                                                                                                                                             |
| Interventions             | Placebo or subcutaneous treatment with 2 weekly/8 injections in total or every month/4 injections in total) of omalizumab                                                                                                                                                                                                           |
| Adherence reported yes/no | No                                                                                                                                                                                                                                                                                                                                  |
| Primary outcomes          | The reduction in total nasal endoscopic polyp score after 16 weeks                                                                                                                                                                                                                                                                  |
| Secondary outcomes        | The change in the following: sinus computed tomography scan, nasal and asthma symptoms, validated questionnaires (SF-36, RSOM-31 and AQLQ) and serum/nasal secretion biomarkers                                                                                                                                                     |

|                           |                                                                                                                                                                                                                                                                                                                                                                                                                                                                                                                                                   |
|---------------------------|---------------------------------------------------------------------------------------------------------------------------------------------------------------------------------------------------------------------------------------------------------------------------------------------------------------------------------------------------------------------------------------------------------------------------------------------------------------------------------------------------------------------------------------------------|
| Study reference           | Girodet (Gallopamil) 2015                                                                                                                                                                                                                                                                                                                                                                                                                                                                                                                         |
| Study title               | Calcium Channel Blocker Reduces Airway Remodelling in Severe Asthma A Proof-of-Concept Study                                                                                                                                                                                                                                                                                                                                                                                                                                                      |
| Study duration            | 3-month run-in period. 52 weeks                                                                                                                                                                                                                                                                                                                                                                                                                                                                                                                   |
| Trial registration:       | NCT 00896428                                                                                                                                                                                                                                                                                                                                                                                                                                                                                                                                      |
| Study Population          | Participants: placebo group, n=15; Gallopamil group, n=16<br>Eligibility criteria: patients of the age $\geq 18$ years with a clinical diagnosis of severe asthma according to ATS criteria, including characteristic symptoms (i.e., wheezing and breathlessness) and bronchial hyperresponsiveness confirmed either by a significant improvement by greater than 15% in the FEV1 10 minutes after the inhalation of 200 mg of salbutamol, or a provocative concentration of methacholine required to lower the FEV1 by 20% of less than 4 mg/ml |
| Setting                   | France                                                                                                                                                                                                                                                                                                                                                                                                                                                                                                                                            |
| Interventions             | 100 mg of oral gallopamil hydrochloride twice daily or a matching placebo                                                                                                                                                                                                                                                                                                                                                                                                                                                                         |
| Adherence reported yes/no | No                                                                                                                                                                                                                                                                                                                                                                                                                                                                                                                                                |
| Primary outcomes          | The bronchial smooth muscle (BSM) area assessed as the percentage of BSM surface on the whole bronchial sections surface at month 12                                                                                                                                                                                                                                                                                                                                                                                                              |
| Secondary outcomes        | Bronchial wall thickness, normalized BSM thickness, frequency of asthma exacerbations, ACQ, SABA use, AQLQ, FEV1, fractional exhaled nitric oxide (FENO), lung hyperinflation (VI950) or air trapping (VE850, difference or ratio between inspiratory and expiratory mean lung density), epithelial area, subepithelial membrane thickness, and lamina propria thickness at month 12                                                                                                                                                              |

|                           |                                                                                                                                                                                                                                                                                                                                               |
|---------------------------|-----------------------------------------------------------------------------------------------------------------------------------------------------------------------------------------------------------------------------------------------------------------------------------------------------------------------------------------------|
| Study reference           | Gotfried (Clarithromycin) 2004                                                                                                                                                                                                                                                                                                                |
| Study title               | Effects of Six-Week Clarithromycin Therapy in Corticosteroid-Dependent Asthma: A Randomized, Double-Blind, Placebo-Controlled Pilot Study                                                                                                                                                                                                     |
| Study duration            | 4-week of observation period. 14 weeks                                                                                                                                                                                                                                                                                                        |
| Trial registration:       | Not documented                                                                                                                                                                                                                                                                                                                                |
| Study Population          | Participants: clarithromycin group, n=15; placebo group, n=6<br>Eligibility criteria: patients of the age 18 to 75 years with an established diagnosis of asthma and who had been receiving ~5 mg/d of prednisone for the preceding 6 months; stable asthma with a ~20% change in prednisone or bronchodilator dosage in the previous 4 weeks |
| Setting                   | USA                                                                                                                                                                                                                                                                                                                                           |
| Interventions             | Oral clarithromycin 500-mg tablets twice daily or identical placebo                                                                                                                                                                                                                                                                           |
| Adherence reported yes/no | No                                                                                                                                                                                                                                                                                                                                            |
| Primary outcomes          | Outcomes: FVC, FEV1, FEV/FVC ratio, PEF, quality of life and asthma symptoms at the end of four weeks treatment                                                                                                                                                                                                                               |
| Secondary outcomes        |                                                                                                                                                                                                                                                                                                                                               |

|                           |                                                                                                                                                                                                                                                                                                         |
|---------------------------|---------------------------------------------------------------------------------------------------------------------------------------------------------------------------------------------------------------------------------------------------------------------------------------------------------|
| Study reference           | Haldar (Mepolizumab) 2009                                                                                                                                                                                                                                                                               |
| Study title               | Mepolizumab and Exacerbations of Refractory Eosinophilic Asthma                                                                                                                                                                                                                                         |
| Study duration            | 2-week run-in period. 50 weeks                                                                                                                                                                                                                                                                          |
| Trial registration:       | ISRCTN75169762                                                                                                                                                                                                                                                                                          |
| Study Population          | Participants: mepolizumab 750 mg group, n=29; placebo group, n= 32<br>Eligibility criteria: $\geq 3\%$ sputum eosinophils on at least 1 occasion in previous 2 years despite high-dose corticosteroid treatment; $\geq 2$ exacerbations in previous 12 months; maintenance treatment with high-dose ICS |
| Setting                   | Single centre trial conducted at Institute for Lung Health, Leicester, UK                                                                                                                                                                                                                               |
| Interventions             | Intravenous mepolizumab (750 mg) versus matched placebo (150 mL of 0.9% saline) at monthly intervals for 1 year                                                                                                                                                                                         |
| Adherence reported yes/no | No                                                                                                                                                                                                                                                                                                      |
| Primary outcomes          | The number of severe exacerbations per participant during the 50-week treatment phase                                                                                                                                                                                                                   |
| Secondary outcomes        | Changes in eosinophil values in blood and sputum samples, FeNO, FEV1 (percent of the predicted value) after bronchodilator use, PC20, AQLQ score, symptom scores, computed assessment of airway-wall geometry, and bronchoscopic assessment of eosinophilic airway inflammation                         |

|                           |                                                                                                                                                                                                                                                                                                                                                                                                                                                                                                                                                                                                                                                                                                                                                                                                                                                                                        |
|---------------------------|----------------------------------------------------------------------------------------------------------------------------------------------------------------------------------------------------------------------------------------------------------------------------------------------------------------------------------------------------------------------------------------------------------------------------------------------------------------------------------------------------------------------------------------------------------------------------------------------------------------------------------------------------------------------------------------------------------------------------------------------------------------------------------------------------------------------------------------------------------------------------------------|
| Study reference           | Hanania (Omalizumab) 2011                                                                                                                                                                                                                                                                                                                                                                                                                                                                                                                                                                                                                                                                                                                                                                                                                                                              |
| Study title               | Omalizumab in Severe Allergic Asthma Inadequately Controlled with Standard Therapy                                                                                                                                                                                                                                                                                                                                                                                                                                                                                                                                                                                                                                                                                                                                                                                                     |
| Study duration            | 2-4-week run-in period. 48 weeks                                                                                                                                                                                                                                                                                                                                                                                                                                                                                                                                                                                                                                                                                                                                                                                                                                                       |
| Trial registration:       | NCT00314575                                                                                                                                                                                                                                                                                                                                                                                                                                                                                                                                                                                                                                                                                                                                                                                                                                                                            |
| Study Population          | Participants: omalizumab group: n=427; placebo group, n=423 (421 completed). Eligibility criteria: patients of the age 12 to 75 years with a history of severe allergic asthma for at least one year before screening; physician diagnosis of asthma on the basis of criteria specified by the NAEPP guidelines; uncontrolled asthma despite treatment with high-dose ICS and LABAs with or without other controllers (including OCS); baseline pre-bronchodilator FEV1 of 40% to 80% of predicted values; serum IgE level of 30 to 700 IU/mL and body weight of 30 to 150 kg; objective evidence of allergy to a relevant perennial aeroallergen, defined as a positive skin test result or in vitro response (radio-allergosorbent test) to dog, cat, cockroach, <i>Dermatophagoides farinae</i> (dust mite) or <i>D. pteronyssinus</i> documented in the 12 months before screening |
| Setting                   | 193 sites in the United States and four sites in Canada                                                                                                                                                                                                                                                                                                                                                                                                                                                                                                                                                                                                                                                                                                                                                                                                                                |
| Interventions             | Minimum dose of 0.008 mg/kg of body weight per IgE (IU/mL) every two weeks or 0.016 mg/kg per IgE (IU/mL) every four weeks versus placebo                                                                                                                                                                                                                                                                                                                                                                                                                                                                                                                                                                                                                                                                                                                                              |
| Adherence reported yes/no | Yes                                                                                                                                                                                                                                                                                                                                                                                                                                                                                                                                                                                                                                                                                                                                                                                                                                                                                    |
| Primary outcomes          | The rate of protocol-defined asthma exacerbations during the 48-week treatment period                                                                                                                                                                                                                                                                                                                                                                                                                                                                                                                                                                                                                                                                                                                                                                                                  |
| Secondary outcomes        | Change from baseline to week 48 in total asthma symptom severity score(TASS) ; change from baseline to week 48 in mean puffs per day of albuterol; and change from baseline to week 48 in overall asthma-specific health-related quality of life, as measured by the standardized version of the AQLQ score                                                                                                                                                                                                                                                                                                                                                                                                                                                                                                                                                                            |



|                           |                                                                                                                                                                                                                                                                                                                                                                                                                                                                            |
|---------------------------|----------------------------------------------------------------------------------------------------------------------------------------------------------------------------------------------------------------------------------------------------------------------------------------------------------------------------------------------------------------------------------------------------------------------------------------------------------------------------|
| Study reference           | Hanania (Lebrikizumab) 2016                                                                                                                                                                                                                                                                                                                                                                                                                                                |
| Study title               | Efficacy and safety of lebrikizumab in patients with uncontrolled asthma (LAVOLTA I and LAVOLTA II): replicate, phase 3, randomised, double-blind, placebo-controlled trials                                                                                                                                                                                                                                                                                               |
| Study duration            | 2-week screening period, 52-weeks                                                                                                                                                                                                                                                                                                                                                                                                                                          |
| Trial registration:       | LAVOLTA; INCT01867125, and LAVOLTA II; NCT01868061                                                                                                                                                                                                                                                                                                                                                                                                                         |
| Study Population          | Participants: 1081 patients were treated in LAVOLTA I and 1067 patients in LAVOLTA II<br>Eligibility criteria: patients of the age 18–75 years with uncontrolled asthma, pre-bronchodilator FEV1 40–80% predicted, bronchodilator response of at least 12%, and on stable background therapy with ICS (500–2000 µg per day fluticasone propionate or equivalent) for at least 6 months and at least one additional controller medication                                   |
| Setting                   | United States, Canada, South Africa, Italy Czech Republic and Japan.                                                                                                                                                                                                                                                                                                                                                                                                       |
| Interventions             | Lebrikizumab 37.5 mg or 125 mg, or placebo subcutaneously, once every 4 weeks                                                                                                                                                                                                                                                                                                                                                                                              |
| Adherence reported yes/no | Yes                                                                                                                                                                                                                                                                                                                                                                                                                                                                        |
| Primary outcomes          | The rate of asthma exacerbations during the 52-week placebo-controlled period in biomarker-high patients (periostin $\geq 50$ ng/mL or blood eosinophils $\geq 300$ cells per $\mu$ L, and including patients high in both)                                                                                                                                                                                                                                                |
| Secondary outcomes        | The absolute change in pre-bronchodilator FEV1 from baseline at week 52; time to first asthma exacerbation during the 52-week placebo-controlled period; rate of urgent asthma related health-care use during the 52-week placebo controlled period; absolute change in AQLQ from baseline at week 52; absolute change in asthma rescue medication use from baseline at week 52; and absolute change in asthma control, as measured by the ACQ-5, from baseline at week 52 |

|                           |                                                                                                                                                                                                                                                                                                                                                                                                                                                                                                                                                                                  |
|---------------------------|----------------------------------------------------------------------------------------------------------------------------------------------------------------------------------------------------------------------------------------------------------------------------------------------------------------------------------------------------------------------------------------------------------------------------------------------------------------------------------------------------------------------------------------------------------------------------------|
| Study reference           | Hanania (Lebrikizumab) 2015                                                                                                                                                                                                                                                                                                                                                                                                                                                                                                                                                      |
| Study title               | Lebrikizumab in moderate-to-severe asthma: pooled data from two randomised placebo-controlled studies                                                                                                                                                                                                                                                                                                                                                                                                                                                                            |
| Study duration            | No run-in period. 52 weeks                                                                                                                                                                                                                                                                                                                                                                                                                                                                                                                                                       |
| Trial registration:       | LUTE study; NCT01545440 VERSE study; NCT01545453                                                                                                                                                                                                                                                                                                                                                                                                                                                                                                                                 |
| Study Population          | Participants: Lebrikizumab 37.5 mg group, n=117; Lebrikizumab 125 mg group, n=112; Lebrikizumab 250 mg group, n=118; placebo group, n=116<br>Eligibility criteria: a diagnosis of asthma $\geq 12$ months; acute bronchodilator response ( $\geq 12\%$ relative improvement) and pre-bronchodilator FEV1 40–80% of predicted; uncontrolled asthma (ACQ-5 score $\geq 1.5$ and at least one of the following: symptoms $> 2$ days/week, night-time awakenings $\geq 1$ time/week, use of a SABA as rescue medication $> 2$ days/week or interference with normal daily activities |
| Setting                   | United States                                                                                                                                                                                                                                                                                                                                                                                                                                                                                                                                                                    |
| Interventions             | Lebrikizumab 37.5, 125, 250 mg, or placebo subcutaneously every four weeks                                                                                                                                                                                                                                                                                                                                                                                                                                                                                                       |
| Adherence reported yes/no | No                                                                                                                                                                                                                                                                                                                                                                                                                                                                                                                                                                               |
| Primary outcomes          | The rate of asthma exacerbations during the placebo-controlled period                                                                                                                                                                                                                                                                                                                                                                                                                                                                                                            |
| Secondary outcomes        | The change in prebronchodilator FEV1 from baseline, time to first asthma exacerbation during the placebo-controlled period, change from baseline in the AQLQ score, change in asthma rescue medication use from baseline, rate of urgent asthma-related healthcare use (i.e., hospitalisations, emergency department visits and acute care visits) during the placebo-controlled period                                                                                                                                                                                          |

|                           |                                                                                                                                                                                                                                                    |
|---------------------------|----------------------------------------------------------------------------------------------------------------------------------------------------------------------------------------------------------------------------------------------------|
| Study reference           | Hedman (Methotrexate) 1996                                                                                                                                                                                                                         |
| Study title               | Controlled trial of Methotrexate in patients with severe chronic asthma                                                                                                                                                                            |
| Study duration            | 2-week run-in period. 24 weeks                                                                                                                                                                                                                     |
| Trial registration:       | Not documented                                                                                                                                                                                                                                     |
| Study Population          | Participants: 13 patients enrolled, crossover trial<br>Eligibility criteria: severe chronic asthma with continuous oral steroids treatment of at least 2.5mg/day for a year; Inhaled budesonide dose of $\geq 1.6$ mg; patient age <65years of age |
| Setting                   | Finland and Sweden                                                                                                                                                                                                                                 |
| Interventions             | 15mg Methotrexate or identical placebo                                                                                                                                                                                                             |
| Adherence reported yes/no | No                                                                                                                                                                                                                                                 |
| Primary outcomes          | PEFR, FEV1                                                                                                                                                                                                                                         |
| Secondary outcomes        |                                                                                                                                                                                                                                                    |

|                           |                                                                                                                                                                                                                                                                                                 |
|---------------------------|-------------------------------------------------------------------------------------------------------------------------------------------------------------------------------------------------------------------------------------------------------------------------------------------------|
| Study reference           | Hodgson (Ciclesonide) 2015                                                                                                                                                                                                                                                                      |
| Study title               | A randomised controlled trial of small particle inhaled steroids in refractory eosinophilic asthma (SPIRA)                                                                                                                                                                                      |
| Study duration            | 12 weeks                                                                                                                                                                                                                                                                                        |
| Trial registration:       | NCT01171365                                                                                                                                                                                                                                                                                     |
| Study Population          | Participants: ciclesonide group n=15; placebo group n=15<br>Eligibility criteria: patients meeting the ATS criteria for refractory asthma with evidence of ongoing eosinophilic inflammation (sputum differential cell count $\geq 3\%$ or blood eosinophils $\geq 0.4 \times 10^9/\text{mL}$ ) |
| Setting                   | United Kingdom                                                                                                                                                                                                                                                                                  |
| Interventions             | Ciclesonide 320 mg twice daily or placebo for 8 weeks in addition to their usual maintenance medication                                                                                                                                                                                         |
| Adherence reported yes/no | Yes                                                                                                                                                                                                                                                                                             |
| Primary outcomes          | The change in sputum differential eosinophil count between randomisation and week 8                                                                                                                                                                                                             |
| Secondary outcomes        | ACQ score, AQLQ score, pre-bronchodilator FEV1, bronchial NO and alveolar NO at week 8.                                                                                                                                                                                                         |

|                           |                                                                                                                                                                                                                                                                                                                                       |
|---------------------------|---------------------------------------------------------------------------------------------------------------------------------------------------------------------------------------------------------------------------------------------------------------------------------------------------------------------------------------|
| Study reference           | Holgate (Omalizumab) 2004                                                                                                                                                                                                                                                                                                             |
| Study title               | Efficacy and safety of a recombinant anti-immunoglobulin E antibody (omalizumab) in severe allergic asthma                                                                                                                                                                                                                            |
| Study duration            | 6–10-week run-in period. 32 weeks                                                                                                                                                                                                                                                                                                     |
| Trial registration:       | Not documented                                                                                                                                                                                                                                                                                                                        |
| Study Population          | Participants: Omalizumab , n=126; placebo, n=120<br>Eligibility criteria: patients aged 12–75 years; required 1000 mg/day fluticasone for symptom control (all patients were switched to inhaled fluticasone during the run-in period); demonstrated positive skin prick test to aeroallergen/s, and had serum total IgE 30–700 IU/mL |
| Setting                   | Canada and European countries                                                                                                                                                                                                                                                                                                         |
| Interventions             | Omalizumab administered subcutaneously [minimum 0.016mg/kg/IgE (IU/mL) per 4 weeks; or matching placebo at intervals of 2 or 4 weeks                                                                                                                                                                                                  |
| Adherence reported yes/no | No                                                                                                                                                                                                                                                                                                                                    |
| Primary outcomes          | The percentage reduction from baseline in fluticasone dose after 32 weeks' treatment                                                                                                                                                                                                                                                  |
| Secondary outcomes        | Absolute reduction in fluticasone dose compared to baseline, asthma exacerbation episodes, use of rescue medication, asthma symptom score, peak expiratory flow (PEF) and post-bronchodilator spirometry, QoL.                                                                                                                        |

|                           |                                                                                                                                                                                                                                                                                                                                                                                                                                                                                                                                                                                                                                                                                                                                                          |
|---------------------------|----------------------------------------------------------------------------------------------------------------------------------------------------------------------------------------------------------------------------------------------------------------------------------------------------------------------------------------------------------------------------------------------------------------------------------------------------------------------------------------------------------------------------------------------------------------------------------------------------------------------------------------------------------------------------------------------------------------------------------------------------------|
| Study reference           | Holgate (Etanercept) 2011                                                                                                                                                                                                                                                                                                                                                                                                                                                                                                                                                                                                                                                                                                                                |
| Study title               | Efficacy and safety of etanercept in moderate-to-severe asthma: a randomised, controlled trial                                                                                                                                                                                                                                                                                                                                                                                                                                                                                                                                                                                                                                                           |
| Study duration            | 12 weeks                                                                                                                                                                                                                                                                                                                                                                                                                                                                                                                                                                                                                                                                                                                                                 |
| Trial registration:       | NCT00141791                                                                                                                                                                                                                                                                                                                                                                                                                                                                                                                                                                                                                                                                                                                                              |
| Study Population          | Participants: etanercept group, n=68; placebo group, n=64<br>Eligibility criteria: patients of the age 18–70 years, with moderate to severe persistent asthma{ defined by the National Heart, Lung and Blood Institute (NHLBI)} for at least 1 year; demonstrated reversibility of at least 9% and (FEV1) 50% to 80% predicted after a SABA or 12 h after a LABA at screening or baseline; have a mean ACQ-5 score of $\geq 2$ ; treated with high-dose ICS ( $\geq 1,000$ $\mu\text{g/day}$ beclomethasone–chlorofluorocarbons, 500 mg/day beclomethasone–hydrofluoroalkane, 500 mg/day fluticasone or 1,000 mg/day budesonide, or equivalent); and be receiving stable doses of their current medications for asthma $>4$ weeks prior to randomisation |
| Setting                   | United States                                                                                                                                                                                                                                                                                                                                                                                                                                                                                                                                                                                                                                                                                                                                            |
| Interventions             | Subcutaneous injection of either 25 mg ETN or placebo twice weekly                                                                                                                                                                                                                                                                                                                                                                                                                                                                                                                                                                                                                                                                                       |
| Adherence reported yes/no | No                                                                                                                                                                                                                                                                                                                                                                                                                                                                                                                                                                                                                                                                                                                                                       |
| Primary outcomes          | Change in FEV1% predicted from baseline to week 12 (before bronchodilator administration)                                                                                                                                                                                                                                                                                                                                                                                                                                                                                                                                                                                                                                                                |
| Secondary outcomes        | The change in PEFR, ACQ, asthma exacerbations at week from baseline to week 12                                                                                                                                                                                                                                                                                                                                                                                                                                                                                                                                                                                                                                                                           |

|                           |                                                                                                                                                                                                                                                                                                                                                                                                                                       |
|---------------------------|---------------------------------------------------------------------------------------------------------------------------------------------------------------------------------------------------------------------------------------------------------------------------------------------------------------------------------------------------------------------------------------------------------------------------------------|
| Study reference           | Humbert (Omalizumab) 2005                                                                                                                                                                                                                                                                                                                                                                                                             |
| Study title               | Benefits of omalizumab as add-on therapy in patients with severe persistent asthma who are inadequately controlled despite best available therapy (GINA 2002 step 4 treatment): INNOVATE                                                                                                                                                                                                                                              |
| Study duration            | 7-day screening period; 8-week run-in period. 28 weeks                                                                                                                                                                                                                                                                                                                                                                                |
| Trial registration:       | Not documented                                                                                                                                                                                                                                                                                                                                                                                                                        |
| Study Population          | Participants: Omalizumab group, n=209; placebo group, n=210<br>Eligibility criteria: positive skin prick test to $\geq 1$ aeroallergen; serum IgE: 30 to 700 IU/mL; severe persistent asthma requiring $> 1000$ BDP or equivalent and LABA treatment; FEV1 40% to 80%; FEV1 reversibility $\geq 12\%$ post SABA; $\geq$ two exacerbations requiring OCS in previous 12 months or one severe exacerbation resulting in hospitalisation |
| Setting                   | France, New Zealand , Scotland, Canada, France, Germany, Spain, Italy, United Kingdom                                                                                                                                                                                                                                                                                                                                                 |
| Interventions             | Subcutaneous omalizumab (0.016 mg/kg per IU/mL) (plus usual care or placebo)                                                                                                                                                                                                                                                                                                                                                          |
| Adherence reported yes/no | Yes                                                                                                                                                                                                                                                                                                                                                                                                                                   |
| Primary outcomes          | The rate of clinically significant asthma exacerbations during the 28-week double-blind treatment phase                                                                                                                                                                                                                                                                                                                               |
| Secondary outcomes        | The change in asthma symptoms, morning PEF, rescue medication use and FEV1, Asthma-related QoL from baseline to week 28                                                                                                                                                                                                                                                                                                               |

|                           |                                                                                                                                                                                                                                                                                                                                                                                                                                                                                                                                                                                                                                                                                                                                                                                                                                                                                                                                                                                                        |
|---------------------------|--------------------------------------------------------------------------------------------------------------------------------------------------------------------------------------------------------------------------------------------------------------------------------------------------------------------------------------------------------------------------------------------------------------------------------------------------------------------------------------------------------------------------------------------------------------------------------------------------------------------------------------------------------------------------------------------------------------------------------------------------------------------------------------------------------------------------------------------------------------------------------------------------------------------------------------------------------------------------------------------------------|
| Study reference           | Humbert (Masitinib) 2009                                                                                                                                                                                                                                                                                                                                                                                                                                                                                                                                                                                                                                                                                                                                                                                                                                                                                                                                                                               |
| Study title               | Masitinib, a c-kit/PDGF receptor tyrosine kinase inhibitor, improves disease control in severe corticosteroid-dependent asthmatics                                                                                                                                                                                                                                                                                                                                                                                                                                                                                                                                                                                                                                                                                                                                                                                                                                                                     |
| Study duration            | 16 weeks                                                                                                                                                                                                                                                                                                                                                                                                                                                                                                                                                                                                                                                                                                                                                                                                                                                                                                                                                                                               |
| Trial registration:       | NCT00842270                                                                                                                                                                                                                                                                                                                                                                                                                                                                                                                                                                                                                                                                                                                                                                                                                                                                                                                                                                                            |
| Study Population          | <p>Participants: masitinib 3 mg/kg/day (n = 12); masitinib 4.5 mg/kg/day (n = 11); masitinib 6 mg/kg/day (n = 10); all masitinib groups, (n = 33): placebo group, (n = 11)</p> <p>Eligibility criteria: Patients of the age 18–75 years with a diagnosis of asthma for <math>\geq 3</math> years and severe uncontrolled disease for <math>\geq 1</math> year; stable disease with no exacerbation episode for at least one month before inclusion; postbronchodilator reversibility in FEV1 of <math>\geq 12\%</math>; to have experienced asthma symptoms more than once in 3 days for <math>\geq 3</math> months before screening despite continuous treatment with high-dose ICS (beclomethasone <math>\geq 1000</math>mg or equivalent), LABA and daily oral corticosteroids (10–50 mg of equivalent prednisolone, with stable dosage for at least 3 months) and (iii) patients had to be non-smokers for at least 1 year with a prior tobacco consumption of <math>&lt; 10</math> pack-years</p> |
| Setting                   | France                                                                                                                                                                                                                                                                                                                                                                                                                                                                                                                                                                                                                                                                                                                                                                                                                                                                                                                                                                                                 |
| Interventions             | One of four masitinib groups for a 16-week treatment period: masitinib at 3, 4.5 or 6 mg/kg/day or placebo control                                                                                                                                                                                                                                                                                                                                                                                                                                                                                                                                                                                                                                                                                                                                                                                                                                                                                     |
| Adherence reported yes/no | No                                                                                                                                                                                                                                                                                                                                                                                                                                                                                                                                                                                                                                                                                                                                                                                                                                                                                                                                                                                                     |
| Primary outcomes          | The decrease in oral corticosteroid therapy (weaning extent) at week 16                                                                                                                                                                                                                                                                                                                                                                                                                                                                                                                                                                                                                                                                                                                                                                                                                                                                                                                                |
| Secondary outcomes        | Asthma control/ improvement and asthma exacerbation rate at week 16                                                                                                                                                                                                                                                                                                                                                                                                                                                                                                                                                                                                                                                                                                                                                                                                                                                                                                                                    |



|                           |                                                                                                                                                                                                                                                                                          |
|---------------------------|------------------------------------------------------------------------------------------------------------------------------------------------------------------------------------------------------------------------------------------------------------------------------------------|
| Study reference           | Juergens (Eucalyptol) 2003                                                                                                                                                                                                                                                               |
| Study title               | Anti-inflammatory activity of 1,8-cineol (eucalyptol) in bronchial asthma: a double-blind placebo-controlled trial                                                                                                                                                                       |
| Study duration            | 2 months run-in. 12 weeks                                                                                                                                                                                                                                                                |
| Trial registration:       | Not documented                                                                                                                                                                                                                                                                           |
| Study Population          | Participants: 1,8-cineol group, n=16; placebo group, n=16<br>Eligibility criteria: a reversibility of at least 15% in FEV1 10 min after inhalation of 200 mg fenoterol, and an airway resistance (RAW) below 0.6 kPa(l/s); Lung function criteria and values conformed to ATS guidelines |
| Setting                   | Germany                                                                                                                                                                                                                                                                                  |
| Interventions             | 1,8-cineol 200 mg three times per day (at 8 a.m., 2 p.m., and 8 p.m.) or placebo capsules                                                                                                                                                                                                |
| Adherence reported yes/no | No                                                                                                                                                                                                                                                                                       |
| Primary outcomes          | The change from the baseline to week 12 of oral steroid dosage                                                                                                                                                                                                                           |
| Secondary outcomes        | The duration of dose reduction tolerated and stable lung function as determined by body plethysmography, stable clinical condition as measured by outpatient PEFr, symptom scores and bronchodilators use, and overall assessment of efficacy by the patient and the study physician.    |

|                           |                                                                                                                                                                                                                                                                                                                                                                                                                                                                                                                                                                                                                                                                                  |
|---------------------------|----------------------------------------------------------------------------------------------------------------------------------------------------------------------------------------------------------------------------------------------------------------------------------------------------------------------------------------------------------------------------------------------------------------------------------------------------------------------------------------------------------------------------------------------------------------------------------------------------------------------------------------------------------------------------------|
| Study reference           | Kaler (Pioglitazone) 2017                                                                                                                                                                                                                                                                                                                                                                                                                                                                                                                                                                                                                                                        |
| Study title               | A Randomized, Placebo-controlled, Double-blinded, Crossover Trial 2 of Pioglitazone for Severe Asthma                                                                                                                                                                                                                                                                                                                                                                                                                                                                                                                                                                            |
| Study duration            | 4-week run-in period. 44 weeks                                                                                                                                                                                                                                                                                                                                                                                                                                                                                                                                                                                                                                                   |
| Trial registration:       | Not documented                                                                                                                                                                                                                                                                                                                                                                                                                                                                                                                                                                                                                                                                   |
| Study Population          | Participants: pioglitazone group, n=14; placebo group, n=12<br>Eligibility criteria: severe asthmatics, between 18 and 75 years of age, who were persistently symptomatic and required use of a rescue $\beta$ 2-agonist inhaler > 2x per week despite treatment with high-dose inhaled corticosteroids (e.g., equivalent to > 1,000mg daily of fluticasone propionate inhalation powder) or oral corticosteroids; documented history of reversible airflow obstruction, as defined by a positive response to an inhaled bronchodilator or a positive methacholine bronchial provocation challenge, as well as a left ventricular ejection fraction of > 50% by echocardiography |
| Setting                   | United States                                                                                                                                                                                                                                                                                                                                                                                                                                                                                                                                                                                                                                                                    |
| Interventions             | Pioglitazone 30mg daily or matching placebo (crossover trial)                                                                                                                                                                                                                                                                                                                                                                                                                                                                                                                                                                                                                    |
| Adherence reported yes/no | No                                                                                                                                                                                                                                                                                                                                                                                                                                                                                                                                                                                                                                                                               |
| Primary outcomes          | The between group change in AQLQ from baseline to 16 weeks                                                                                                                                                                                                                                                                                                                                                                                                                                                                                                                                                                                                                       |
| Secondary outcomes        | The change in ACQ score, daily asthma symptom score, rescue inhaler utilization (# puffs/day), asthma symptom-free days, nights with asthma symptoms, asthma exacerbations (mild and severe), pre- and post-bronchodilator FEV1, blood inflammatory cell counts (eosinophils, neutrophils, lymphocytes, monocytes and basophils), serum IgE levels, and FeNO from baseline to week 16                                                                                                                                                                                                                                                                                            |

|                           |                                                                                                                                                                                                                                                                                                                                                              |
|---------------------------|--------------------------------------------------------------------------------------------------------------------------------------------------------------------------------------------------------------------------------------------------------------------------------------------------------------------------------------------------------------|
| Study reference           | Kanzow (Methotrexate) 1995                                                                                                                                                                                                                                                                                                                                   |
| Study title               | Short term effect of Methotrexate in severe steroid-dependent asthma                                                                                                                                                                                                                                                                                         |
| Study duration            | 3-week run-in period. 16 weeks of treatment period and 8 weeks of run-out period                                                                                                                                                                                                                                                                             |
| Trial registration:       | Not documented                                                                                                                                                                                                                                                                                                                                               |
| Study Population          | Participants: methotrexate group, n=12, Placebo group, n=9<br>Eligibility criteria: age>30 years; diagnosis of asthma as per ATS criteria; continuous use of oral prednisolone or its equivalent for >1 year at a minimum dose of 15mg/day with at least one documented corticosteroid toxicity; high-dose ICS (beclomethasone/budesonide at least 800µg/day |
| Setting                   | Germany                                                                                                                                                                                                                                                                                                                                                      |
| Interventions             | 15mg methotrexate or identical placebo                                                                                                                                                                                                                                                                                                                       |
| Adherence reported yes/no | No                                                                                                                                                                                                                                                                                                                                                           |
| Primary outcomes          | Reduction in prednisolone dose, PEFR, FEV1, symptom score, Nocturnal awakenings                                                                                                                                                                                                                                                                              |
| Secondary outcomes        |                                                                                                                                                                                                                                                                                                                                                              |

|                           |                                                                                                                                                                                                                                                                                                           |
|---------------------------|-----------------------------------------------------------------------------------------------------------------------------------------------------------------------------------------------------------------------------------------------------------------------------------------------------------|
| Study reference           | Kenyon (L-Arginine) 2011                                                                                                                                                                                                                                                                                  |
| Study title               | L-Arginine Supplementation and Metabolism in Asthma                                                                                                                                                                                                                                                       |
| Study duration            | 3 months                                                                                                                                                                                                                                                                                                  |
| Trial registration:       | NCT00280683                                                                                                                                                                                                                                                                                               |
| Study Population          | Participants: L-arginine group, n=10; placebo group, n=10<br>Eligibility criteria: moderate to severe persistent asthma, were at least 18 years of age, not pregnant; patients did not have an acute exacerbation at the time of enrolment and were on the same asthma medications for at least one month |
| Setting                   | United States                                                                                                                                                                                                                                                                                             |
| Interventions             | 0.01 g/kg/day of L-arginine in divided doses for three months. Placebo tablets that match the L-arginine intervention tablets were given for three months                                                                                                                                                 |
| Adherence reported yes/no | No                                                                                                                                                                                                                                                                                                        |
| Primary outcomes          | Number of asthma exacerbations in three months                                                                                                                                                                                                                                                            |
| Secondary outcomes        | L-arginine serum concentration [ Time Frame: 90 days ]                                                                                                                                                                                                                                                    |

|                           |                                                                                                                                                                                                                                                                                                                                                                                                                                                                                                                                                                                                                                                                                  |
|---------------------------|----------------------------------------------------------------------------------------------------------------------------------------------------------------------------------------------------------------------------------------------------------------------------------------------------------------------------------------------------------------------------------------------------------------------------------------------------------------------------------------------------------------------------------------------------------------------------------------------------------------------------------------------------------------------------------|
| Study reference           | Kerstjens (Tiotropium) 2011                                                                                                                                                                                                                                                                                                                                                                                                                                                                                                                                                                                                                                                      |
| Study title               | Tiotropium improves lung function in patients with severe uncontrolled asthma: A randomized controlled trial                                                                                                                                                                                                                                                                                                                                                                                                                                                                                                                                                                     |
| Study duration            | 2-week run-in period. 24 weeks                                                                                                                                                                                                                                                                                                                                                                                                                                                                                                                                                                                                                                                   |
| Trial registration:       | NCT00365560                                                                                                                                                                                                                                                                                                                                                                                                                                                                                                                                                                                                                                                                      |
| Study Population          | Participants: 107 patients randomised<br>Eligibility criteria: patients of the age 18 to 75 years with at least a 5-year history of asthma and a current diagnosis of severe persistent asthma; They were persistent airflow obstruction and symptomatic with ACQ-5 score of $\geq 1.5$ ; postbronchodilator FEV1 of $\leq 80\%$ of predicted value and $\leq 70\%$ of FVC 30 minutes after inhalation of 4x100 $\mu$ g of salbutamol at screening) despite therapy with a high-dose ICS ( $\geq 800$ mg of budesonide or equivalent, see this article's Online Repository) and a LABA; non-smokers or not have smoked for a year and have a smoking history of $<10$ pack-years |
| Setting                   | Germany, Denmark and Netherlands                                                                                                                                                                                                                                                                                                                                                                                                                                                                                                                                                                                                                                                 |
| Interventions             | Random sequence for 8 weeks in a crossover design (5 or 10 mg of tiotropium or matching placebo administered as 2 actuations once daily through the RespiMat inhaler                                                                                                                                                                                                                                                                                                                                                                                                                                                                                                             |
| Adherence reported yes/no | No                                                                                                                                                                                                                                                                                                                                                                                                                                                                                                                                                                                                                                                                               |
| Primary outcomes          | The FEV1 response (within 3 hours post dosing) determined at the end of the 8-week treatment period                                                                                                                                                                                                                                                                                                                                                                                                                                                                                                                                                                              |
| Secondary outcomes        | The trough FEV1 and peak and trough FVC at the end of each 8-week treatment period, the area under the curve (AUC) of the first 3 hours of FEV1 (FEV1 AUC0-3h) and FVC (FVC AUC0-3h) and weekly means of pre dose morning and evening PEF and FEV1, asthma symptoms (5-point rating scale), use of rescue medication in the last 5 weeks of treatment, asthma symptom-free days, and AQLQ                                                                                                                                                                                                                                                                                        |

|                           |                                                                                                                                                                                                                                                                                                                                                                                                                                                                                                                                                                                                                                                                                                                                                                                                                                                                                                                                                                                                                                                                                                                                                              |
|---------------------------|--------------------------------------------------------------------------------------------------------------------------------------------------------------------------------------------------------------------------------------------------------------------------------------------------------------------------------------------------------------------------------------------------------------------------------------------------------------------------------------------------------------------------------------------------------------------------------------------------------------------------------------------------------------------------------------------------------------------------------------------------------------------------------------------------------------------------------------------------------------------------------------------------------------------------------------------------------------------------------------------------------------------------------------------------------------------------------------------------------------------------------------------------------------|
| Study reference           | Kerstjens (Tiotropium) 2015                                                                                                                                                                                                                                                                                                                                                                                                                                                                                                                                                                                                                                                                                                                                                                                                                                                                                                                                                                                                                                                                                                                                  |
| Study title               | Tiotropium or salmeterol as add-on therapy to inhaled corticosteroids for patients with moderate symptomatic asthma: two replicate, double-blind, placebo-controlled, parallel-group, active-comparator, randomised trials                                                                                                                                                                                                                                                                                                                                                                                                                                                                                                                                                                                                                                                                                                                                                                                                                                                                                                                                   |
| Study duration            | 4-week run-in period. 24 weeks                                                                                                                                                                                                                                                                                                                                                                                                                                                                                                                                                                                                                                                                                                                                                                                                                                                                                                                                                                                                                                                                                                                               |
| Trial registration:       | NCT01172808 and NCT01172821                                                                                                                                                                                                                                                                                                                                                                                                                                                                                                                                                                                                                                                                                                                                                                                                                                                                                                                                                                                                                                                                                                                                  |
| Study Population          | <p>Participants: tiotropium 5 µg group, n=519; tiotropium 2.5 µg group, n=520; salmeterol group, n=541; or placebo group, n=523</p> <p>Eligibility criteria: male or female, aged between 18 and 75 years, and had been diagnosed with asthma before age 40 years and at least 3 months before enrolment; diagnosis of asthma confirmed at screening on the basis of bronchodilator reversibility, with an FEV1 increase of <math>\geq 12\%</math> and <math>\geq 200</math> mL 5–30 min after 400 µg salbutamol; symptomatic (mean ACQ-7 score of <math>\geq 1.5</math>) at screening and before randomisation, had to have a pre-bronchodilator FEV1 60–90% of predicted at screening, and had to show FEV1 variability at randomisation within plus or minus 30% of the screening value. stable treatment with medium-dose inhaled corticosteroids of 400–800 µg budesonide or equivalent (alone or in fixed combination with a LABA or short-acting <math>\beta_2</math> agonist) for at least 4 weeks before screening. Patients were to have never smoked or been ex-smokers for more than 1 year, with a total of <math>\leq 10</math> pack-years</p> |
| Setting                   | 233 sites in 14 countries (Latvia, Poland, Romania, Russia, Brazil, China, Colombia, Germany, Guatemala, India, Japan, Mexico, Peru, and the USA)                                                                                                                                                                                                                                                                                                                                                                                                                                                                                                                                                                                                                                                                                                                                                                                                                                                                                                                                                                                                            |
| Interventions             | Once daily tiotropium 5 µg or 2.5 µg, twice-daily salmeterol 50 µg, or placebo.                                                                                                                                                                                                                                                                                                                                                                                                                                                                                                                                                                                                                                                                                                                                                                                                                                                                                                                                                                                                                                                                              |
| Adherence reported yes/no | No                                                                                                                                                                                                                                                                                                                                                                                                                                                                                                                                                                                                                                                                                                                                                                                                                                                                                                                                                                                                                                                                                                                                                           |
| Primary outcomes          | <p>The peak FEV1 response, measured within the first 3 h after evening dosing, and trough FEV1 response, measured at the end of the dosing interval (24 h after drug administration), 10 min before the next dose, both determined at the end of the 24-week treatment period.</p> <p>The improvement in ACQ-7 score of <math>\geq 0.5</math> or more at the end of week 24</p>                                                                                                                                                                                                                                                                                                                                                                                                                                                                                                                                                                                                                                                                                                                                                                              |
| Secondary outcomes        | <p>All determined at the end of the 24-week treatment period, included peak FVC, trough FVC, mean weekly pre-dose morning PEF response, and mean weekly pre-dose evening PEF response, AQLQ, and times to first severe asthma exacerbation and first asthma exacerbation (both during the 24-week treatment period)</p>                                                                                                                                                                                                                                                                                                                                                                                                                                                                                                                                                                                                                                                                                                                                                                                                                                      |

|                           |                                                                                                                                                                                                                                                                                                                                                                                                                                                                    |
|---------------------------|--------------------------------------------------------------------------------------------------------------------------------------------------------------------------------------------------------------------------------------------------------------------------------------------------------------------------------------------------------------------------------------------------------------------------------------------------------------------|
| Study reference           | Kishiyama (IVIG) 1999                                                                                                                                                                                                                                                                                                                                                                                                                                              |
| Study title               | A Multicentre, Randomized, Double-Blind, Placebo-Controlled Trial of High-Dose Intravenous Immunoglobulin for Oral Corticosteroid-Dependent Asthma                                                                                                                                                                                                                                                                                                                 |
| Study duration            | 2-month observation/run-in period. 7 months                                                                                                                                                                                                                                                                                                                                                                                                                        |
| Trial registration:       | Not documented                                                                                                                                                                                                                                                                                                                                                                                                                                                     |
| Study Population          | Participants: IVIG (2 gm/kg) group, n=16; IVIG (1 gm/kg) group, n=9; placebo group, n=15<br>Eligibility criteria: patients of the age 6 to 66 years with a previously diagnosis of asthma, defined by the ATS criteria; unable to decrease their steroid dosage to <0.1 mg/kg/day prednisone (or the equivalent) during the prior 3 months of optimizing therapy or failed to maintain peak flows of > 80% of predicted values on their current dose of prednisone |
| Setting                   | United States                                                                                                                                                                                                                                                                                                                                                                                                                                                      |
| Interventions             | 2 g IVIG/kg/month, 1 g IVIG/kg/month, or 2 g IV albumin (placebo)/kg/month.                                                                                                                                                                                                                                                                                                                                                                                        |
| Adherence reported yes/no | No                                                                                                                                                                                                                                                                                                                                                                                                                                                                 |
| Primary outcomes          | The mean daily prednisone-equivalent dose requirements, determined during the observation month preceding initiation of treatment and compared to the month preceding the seventh infusion                                                                                                                                                                                                                                                                         |
| Secondary outcomes        | FEV1, frequency of emergency room visits or hospitalizations, and number of days absent from school or work                                                                                                                                                                                                                                                                                                                                                        |

|                           |                                                                                                                                                                                                                                                                                                                                                                                                                                                                                                                                                                                                                                                                                                                                                                                                                                                                                                                            |
|---------------------------|----------------------------------------------------------------------------------------------------------------------------------------------------------------------------------------------------------------------------------------------------------------------------------------------------------------------------------------------------------------------------------------------------------------------------------------------------------------------------------------------------------------------------------------------------------------------------------------------------------------------------------------------------------------------------------------------------------------------------------------------------------------------------------------------------------------------------------------------------------------------------------------------------------------------------|
| Study reference           | Lanier (Omalizumab) 2003                                                                                                                                                                                                                                                                                                                                                                                                                                                                                                                                                                                                                                                                                                                                                                                                                                                                                                   |
| Study title               | Omalizumab is the effective in the long-term control of severe allergic asthma                                                                                                                                                                                                                                                                                                                                                                                                                                                                                                                                                                                                                                                                                                                                                                                                                                             |
| Study duration            | 24 weeks                                                                                                                                                                                                                                                                                                                                                                                                                                                                                                                                                                                                                                                                                                                                                                                                                                                                                                                   |
| Trial registration:       | Extension phase of Busse 2001                                                                                                                                                                                                                                                                                                                                                                                                                                                                                                                                                                                                                                                                                                                                                                                                                                                                                              |
| Study Population          | <p>Participants: omalizumab group, n= 245; placebo group, n=215</p> <p>Eligibility criteria: male or female allergic asthmatics aged 12 to 75 years who were symptomatic despite treatment with ICSs; duration of asthma <math>\geq 1</math> year; positive immediate responses on skin prick testing to at least 1 common allergen, including <i>Dermatophagoides farinae</i>, <i>Dermatophagoides pteronyssinus</i>, cockroach (whole body), dog, or cat; total serum IgE <math>\geq 30</math> IU/mL to <math>\leq 700</math> IU/mL; FEV1 reversibility of <math>\geq 12\%</math> within 30 minutes after administration of albuterol (90-180 <math>\mu</math>g); baseline FEV1 <math>\geq 40\%</math> and <math>\leq 80\%</math> of predicted; and treatment with 420 to 840 <math>\mu</math>g/day of beclomethasone dipropionate (BDP) or its equivalent ICS for <math>\geq 3</math> months prior to randomization</p> |
| Setting                   | United States and United Kingdom                                                                                                                                                                                                                                                                                                                                                                                                                                                                                                                                                                                                                                                                                                                                                                                                                                                                                           |
| Interventions             | placebo or omalizumab subcutaneously every 2 or 4 weeks, depending on baseline IgE level and body weight                                                                                                                                                                                                                                                                                                                                                                                                                                                                                                                                                                                                                                                                                                                                                                                                                   |
| Adherence reported yes/no | No                                                                                                                                                                                                                                                                                                                                                                                                                                                                                                                                                                                                                                                                                                                                                                                                                                                                                                                         |
| Primary outcomes          | The number of patients experiencing at least 1 asthma exacerbation                                                                                                                                                                                                                                                                                                                                                                                                                                                                                                                                                                                                                                                                                                                                                                                                                                                         |
| Secondary outcomes        | FEV1                                                                                                                                                                                                                                                                                                                                                                                                                                                                                                                                                                                                                                                                                                                                                                                                                                                                                                                       |



|                           |                                                                                                                                                                                                                                                                                                                                                                                                                                                                                                                                                                                                                                                                                                                                                                                                                                                                                                                                                                                                                                                 |
|---------------------------|-------------------------------------------------------------------------------------------------------------------------------------------------------------------------------------------------------------------------------------------------------------------------------------------------------------------------------------------------------------------------------------------------------------------------------------------------------------------------------------------------------------------------------------------------------------------------------------------------------------------------------------------------------------------------------------------------------------------------------------------------------------------------------------------------------------------------------------------------------------------------------------------------------------------------------------------------------------------------------------------------------------------------------------------------|
| Study reference           | Laviollette (Benralizumab) 2013                                                                                                                                                                                                                                                                                                                                                                                                                                                                                                                                                                                                                                                                                                                                                                                                                                                                                                                                                                                                                 |
| Study title               | Effects of benralizumab on airway eosinophils in asthmatic patients with sputum eosinophilia                                                                                                                                                                                                                                                                                                                                                                                                                                                                                                                                                                                                                                                                                                                                                                                                                                                                                                                                                    |
| Study duration            | 14-day screening period. 84 days                                                                                                                                                                                                                                                                                                                                                                                                                                                                                                                                                                                                                                                                                                                                                                                                                                                                                                                                                                                                                |
| Trial registration:       | NCT00659659                                                                                                                                                                                                                                                                                                                                                                                                                                                                                                                                                                                                                                                                                                                                                                                                                                                                                                                                                                                                                                     |
| Study Population          | <p>Participants: Cohort 1; benralizumab, 1 mg/kg group, n= 8; placebo group, n = 5. Cohort 2: benralizumab, 100 mg group, n= ; benralizumab 200 mg group, n =5; placebo group, n =5</p> <p>Eligibility criteria: patients of the age 18 to 65 years; documented diagnosis of asthma supported by at least 1 of the following criteria: (1) 12% or greater increase in FEV1 after inhalation of 400 mg of albuterol during screening, (2) history of <math>\geq 12\%</math> FEV1 reversibility within 1 year of randomization, or (3) history of 20% reduction in FEV1 in response to a provocative methacholine challenge (PC20) of less than 8 mg/mL within 1 year of randomization; sputum eosinophil counts of <math>\geq 2.5\%</math>, postbronchodilator FEV1 of <math>\geq 65\%</math>, prebronchodilator FEV1/FVC ratio of less than age-adjusted norms, and an asthma therapeutic regimen that was unchanged for 4 weeks before randomization and maintained from screening to the first follow-up airway mucosal/submucosal biopsy</p> |
| Setting                   | 3 United States and 4 Canadian medical centres.                                                                                                                                                                                                                                                                                                                                                                                                                                                                                                                                                                                                                                                                                                                                                                                                                                                                                                                                                                                                 |
| Interventions             | Intravenous infusion of 1 mg/kg benralizumab or placebo (2:1) on day 0 (cohort 1) or 100 or 200 mg of benralizumab or placebo (1:1:1) delivered in 4 subcutaneous injections on days 0, 28, and 56 (cohort 2).                                                                                                                                                                                                                                                                                                                                                                                                                                                                                                                                                                                                                                                                                                                                                                                                                                  |
| Adherence reported yes/no | No                                                                                                                                                                                                                                                                                                                                                                                                                                                                                                                                                                                                                                                                                                                                                                                                                                                                                                                                                                                                                                              |
| Primary outcomes          | Safety and the effect of benralizumab on eosinophil counts in airway mucosal/submucosal biopsy specimens 28 days after completion of dosing                                                                                                                                                                                                                                                                                                                                                                                                                                                                                                                                                                                                                                                                                                                                                                                                                                                                                                     |
| Secondary outcomes        | Evaluate the pharmacokinetics (PK) of MEDI-563 in adults with atopic asthma and evaluate the immunogenicity (IM) of MEDI-563 in adults with atopic asthma. [ Time Frame: Day 84 or 140 ]                                                                                                                                                                                                                                                                                                                                                                                                                                                                                                                                                                                                                                                                                                                                                                                                                                                        |

|                           |                                                                                                                                                                                                                                                                                                                                                                                                                                                                                                                                                                                                                                                            |
|---------------------------|------------------------------------------------------------------------------------------------------------------------------------------------------------------------------------------------------------------------------------------------------------------------------------------------------------------------------------------------------------------------------------------------------------------------------------------------------------------------------------------------------------------------------------------------------------------------------------------------------------------------------------------------------------|
| Study reference           | Li (Omalizumab) 2014                                                                                                                                                                                                                                                                                                                                                                                                                                                                                                                                                                                                                                       |
| Study title               | Omalizumab Improves Quality of Life and Asthma Control in Chinese Patients with Moderate to Severe Asthma: A Randomized Phase III Study                                                                                                                                                                                                                                                                                                                                                                                                                                                                                                                    |
| Study duration            | 6-week screening period. 24 weeks.                                                                                                                                                                                                                                                                                                                                                                                                                                                                                                                                                                                                                         |
| Trial registration:       | NCT01202903                                                                                                                                                                                                                                                                                                                                                                                                                                                                                                                                                                                                                                                |
| Study Population          | Participants: omalizumab group, n=310; placebo group, n=299<br>Eligibility criteria: patients of the age 18-75 years, with confirmed diagnosis of moderate-to-severe persistent allergic asthma {inadequately controlled symptoms despite medium-to high-dose ICS+LABA (GINA step 4) therapy; positive reaction to at least 1 perennial aeroallergen and reported $\geq 2$ or $\geq 3$ exacerbation events in previous 12 or 24 months, respectively; FEV1 of 40%-80% of predicted normal with post-bronchodilator reversibility of $\geq 12\%$ within 30 minutes and compliance with completion of PEF electronic diary (eDiary) during the run-in period |
| Setting                   |                                                                                                                                                                                                                                                                                                                                                                                                                                                                                                                                                                                                                                                            |
| Interventions             | Add-on omalizumab or add-on placebo by subcutaneous injections for 24 weeks                                                                                                                                                                                                                                                                                                                                                                                                                                                                                                                                                                                |
| Adherence reported yes/no | No                                                                                                                                                                                                                                                                                                                                                                                                                                                                                                                                                                                                                                                         |
| Primary outcomes          | The mean change from baseline in morning PEF (am PEF, L/min) measured using a PEF meter after 24 weeks of treatment                                                                                                                                                                                                                                                                                                                                                                                                                                                                                                                                        |
| Secondary outcomes        | FEV1 % predicted at weeks 16 and 24 weeks and ACQ, AQLQ, Global Evaluation of Treatment Effectiveness (GETE) responder analysis, scores at Weeks 16 and 24. The rate and seasonal effect of protocol-defined asthma exacerbations were assessed as exploratory outcomes                                                                                                                                                                                                                                                                                                                                                                                    |

|                           |                                                                                                                                                                                                                                                                                             |
|---------------------------|---------------------------------------------------------------------------------------------------------------------------------------------------------------------------------------------------------------------------------------------------------------------------------------------|
| Study reference           | Lock (Ciclosporin) 1996                                                                                                                                                                                                                                                                     |
| Study title               | Double-blind, Placebo-controlled Study of Cyclosporin A as a Corticosteroid-sparing Agent In Corticosteroid-dependent Asthma                                                                                                                                                                |
| Study duration            | 4-week run-in period. 52 weeks                                                                                                                                                                                                                                                              |
| Trial registration:       | Not documented                                                                                                                                                                                                                                                                              |
| Study Population          | Participants: cyclosporin group, n=19; placebo group, n=20<br>Eligibility criteria: corticosteroid-dependent asthmatic patients; documented variability of at least 20% in their FEV1 or PEFr, either spontaneously or following treatment with a bronchodilator (nebulized salbutamol 5mg) |
| Setting                   | United Kingdom                                                                                                                                                                                                                                                                              |
| Interventions             | Cyclosporin at a starting dose of 5mg/kg/d (ideal body weight) or identical placebo presented as capsules, for a period of 36 weeks                                                                                                                                                         |
| Adherence reported yes/no | No                                                                                                                                                                                                                                                                                          |
| Primary outcomes          | Reduction in prednisolone dosage at 36 weeks                                                                                                                                                                                                                                                |
| Secondary outcomes        | FEV1/FVC, response to bronchodilator, diurnal variability of PEFr, or day/night symptom scores                                                                                                                                                                                              |

|                           |                                                                                                                                                                                                                                                                                                                                                                        |
|---------------------------|------------------------------------------------------------------------------------------------------------------------------------------------------------------------------------------------------------------------------------------------------------------------------------------------------------------------------------------------------------------------|
| Study reference           | Lomia (Carbamazepine) 2006                                                                                                                                                                                                                                                                                                                                             |
| Study title               | Bronchial asthma as neurogenic paroxysmal inflammatory disease: A randomized trial with carbamazepine                                                                                                                                                                                                                                                                  |
| Study duration            | 4-week run-in period. 13 weeks                                                                                                                                                                                                                                                                                                                                         |
| Trial registration:       | Not documented                                                                                                                                                                                                                                                                                                                                                         |
| Study Population          | Participants: carbamazepine group, n= 37; placebo group, n=37<br>Eligibility criteria: asthma diagnosis for at least for 1 year, poorly controlled asthma due to various reasons, absence of long-term remissions of asthma (lasting more than 1 month), and if pulmonary function testing demonstrated at least 12% acute response in FEV1 to beta-agonist inhalation |
| Setting                   | Georgia                                                                                                                                                                                                                                                                                                                                                                |
| Interventions             | 100 mg capsules of carbamazepine ) or placebo for 13 weeks                                                                                                                                                                                                                                                                                                             |
| Adherence reported yes/no | No                                                                                                                                                                                                                                                                                                                                                                     |
| Primary outcomes          | Efficacy of carbamazepine was evaluated by disappearance of any asthmatic syndrome, and normalization of PEF, FEV1                                                                                                                                                                                                                                                     |
| Secondary outcomes        | The daytime scores of asthma, number of night-time awakening per week due to asthma symptoms and also by discontinuation of any other anti-asthmatic therapy except carbamazepine                                                                                                                                                                                      |

|                           |                                                                                                                                                                                                                                                                                                                                                                                                                                             |
|---------------------------|---------------------------------------------------------------------------------------------------------------------------------------------------------------------------------------------------------------------------------------------------------------------------------------------------------------------------------------------------------------------------------------------------------------------------------------------|
| Study reference           | Marin (Nedocromil sodium) 1996                                                                                                                                                                                                                                                                                                                                                                                                              |
| Study title               | Effects of nedocromil sodium in steroid resistant asthma: A randomized controlled trial                                                                                                                                                                                                                                                                                                                                                     |
| Study duration            | 2-week observation period. 2 years                                                                                                                                                                                                                                                                                                                                                                                                          |
| Trial registration:       | Not documented                                                                                                                                                                                                                                                                                                                                                                                                                              |
| Study Population          | Participants: Nedocromil sodium group, n=13, placebo group, n=13<br>Eligibility criteria: non-smoking adults (>18 years of age) with moderate or severe asthma; inadequately controlled by means of inhaled or orally administered corticoids; basal FEV1 <70% of the predicted                                                                                                                                                             |
| Setting                   | Spain                                                                                                                                                                                                                                                                                                                                                                                                                                       |
| Interventions             | Nedocromil sodium or placebo by means of a manual nebulizer for 3 months                                                                                                                                                                                                                                                                                                                                                                    |
| Adherence reported yes/no | Yes                                                                                                                                                                                                                                                                                                                                                                                                                                         |
| Primary outcomes          | Morning PEF (L/min) and the daily use of inhaled salbutamol                                                                                                                                                                                                                                                                                                                                                                                 |
| Secondary outcomes        | FEV~ value, variability of the PEF, value of the questionnaire for quality of life, intake of prednisolone, and number of asthma attacks that occurred during the treatment period. The changes found in FEV 1 between the groups during each visit and the mean morning PEF values, together with the use of salbutamol during the week before each visit in the treatment and washout periods, were compared with their baseline values b |

|                           |                                                                                                                                                                                                                                                                                                                                                                                                                                                                                                                                                                |
|---------------------------|----------------------------------------------------------------------------------------------------------------------------------------------------------------------------------------------------------------------------------------------------------------------------------------------------------------------------------------------------------------------------------------------------------------------------------------------------------------------------------------------------------------------------------------------------------------|
| Study reference           | Morjaria (Etanercept) 2008                                                                                                                                                                                                                                                                                                                                                                                                                                                                                                                                     |
| Study title               | The role of a soluble TNF $\alpha$ receptor fusion protein (etanercept) in corticosteroid refractory asthma: a double blind, randomised, placebo-controlled trial                                                                                                                                                                                                                                                                                                                                                                                              |
| Study duration            | 2-week run-in period. 16 weeks                                                                                                                                                                                                                                                                                                                                                                                                                                                                                                                                 |
| Trial registration:       | Not documented                                                                                                                                                                                                                                                                                                                                                                                                                                                                                                                                                 |
| Study Population          | Participants: etanercept group, n=13; placebo group, n=13<br>Eligibility criteria: severe refractory asthma as per GINA guidelines {current treatment with oral prednisolone (2–30 mg/day) and/or high dose ICS (>2000 $\mu$ g/day beclomethasone equivalent) and LABA}; variable airflow obstruction and/or BHR confirmed by an increase in FEV1 by at least 12% after inhalation of 400 $\mu$ g of salbutamol delivered by a metered dose inhaler and spacer, the concentration of methacholine required to cause a 20% (PC20) reduction in FEV1 of <8 mg/ml |
| Setting                   | United Kingdom                                                                                                                                                                                                                                                                                                                                                                                                                                                                                                                                                 |
| Interventions             | 50 mg of etanercept or matched placebo by subcutaneous injections once a week for 12 weeks                                                                                                                                                                                                                                                                                                                                                                                                                                                                     |
| Adherence reported yes/no | Yes                                                                                                                                                                                                                                                                                                                                                                                                                                                                                                                                                            |
| Primary outcomes          | The differences in change of the mean AQLQ score from baseline (visit 0) and the end of treatment (week 12) and change in mean ACQ scores from baseline and the last two treatment visits (week 12 and week 14)                                                                                                                                                                                                                                                                                                                                                |
| Secondary outcomes        | The differences from baseline to visit 12 for BHR, and to the last two treatment visits for predicted FEV1, FEV1/FVC, morning, evening and average daily PEF, and diurnal variation in PEF (calculated by the difference in the evening and morning PEF values)                                                                                                                                                                                                                                                                                                |

|                           |                                                                                                                                                                                                                                                                                                                                                                                                                                                                                                                                                                                                                                                                                                                                                                                                                                                                             |
|---------------------------|-----------------------------------------------------------------------------------------------------------------------------------------------------------------------------------------------------------------------------------------------------------------------------------------------------------------------------------------------------------------------------------------------------------------------------------------------------------------------------------------------------------------------------------------------------------------------------------------------------------------------------------------------------------------------------------------------------------------------------------------------------------------------------------------------------------------------------------------------------------------------------|
| Study reference           | Nair (SCH 527123) 2012                                                                                                                                                                                                                                                                                                                                                                                                                                                                                                                                                                                                                                                                                                                                                                                                                                                      |
| Study title               | Safety and efficacy of a CXCR2 antagonist in patients with severe asthma and sputum neutrophils: a randomized, placebo-controlled clinical trial                                                                                                                                                                                                                                                                                                                                                                                                                                                                                                                                                                                                                                                                                                                            |
| Study duration            | 2-week run-in period. 4 weeks                                                                                                                                                                                                                                                                                                                                                                                                                                                                                                                                                                                                                                                                                                                                                                                                                                               |
| Trial registration:       | Not documented                                                                                                                                                                                                                                                                                                                                                                                                                                                                                                                                                                                                                                                                                                                                                                                                                                                              |
| Study Population          | Participants: SCH527123 group, n=22; placebo group, n=12<br>Eligibility criteria: patients of the age 18 and 70 years with severe asthma, meeting the National Heart Lung Blood Institute Severe Asthma Programme criteria; asthma diagnosis: $\geq 12\%$ and 200 mL improvement in FEV1 after inhaling salbutamol or by a methacholine PC20 of $< 8$ mg/mL within the past 5 years; treatment with inhaled beclomethasone or equivalent in a dose of $> 1000\mu\text{g}$ daily; sputum neutrophil differentials of $> 40\%$ at the screening visit, a total cell count of $< 10$ million cells/g of sputum selected from saliva and had negative standard cultures for bacteria: non-smokers for at least a year, had $< 20$ pack-years of smoking, were stable for the past 4 weeks and had been on stable treatment under the care of a specialist for at least 3 months |
| Setting                   | 8 academic centres in Canada, Germany, Greece, France, Italy and the United Kingdom                                                                                                                                                                                                                                                                                                                                                                                                                                                                                                                                                                                                                                                                                                                                                                                         |
| Interventions             | SCH527123 30 mg ingested once daily or a matching placebo for 4 weeks                                                                                                                                                                                                                                                                                                                                                                                                                                                                                                                                                                                                                                                                                                                                                                                                       |
| Adherence reported yes/no | No                                                                                                                                                                                                                                                                                                                                                                                                                                                                                                                                                                                                                                                                                                                                                                                                                                                                          |
| Primary outcomes          | Safety as defined by the proportion of subjects in each treatment group who maintain a peripheral neutrophil count $< 1500/\text{IL}$ during the 4-week treatment period                                                                                                                                                                                                                                                                                                                                                                                                                                                                                                                                                                                                                                                                                                    |
| Secondary outcomes        | The change in ACQ score, minor and major exacerbations, PEF and sputum neutrophil activation markers in the 4-week treatment period                                                                                                                                                                                                                                                                                                                                                                                                                                                                                                                                                                                                                                                                                                                                         |

|                           |                                                                                                                                                                                                                                                                                                                                                                                          |
|---------------------------|------------------------------------------------------------------------------------------------------------------------------------------------------------------------------------------------------------------------------------------------------------------------------------------------------------------------------------------------------------------------------------------|
| Study reference           | Nair (Mepolizumab) 2009                                                                                                                                                                                                                                                                                                                                                                  |
| Study title               | Mepolizumab for Prednisone-Dependent Asthma with Sputum Eosinophilia                                                                                                                                                                                                                                                                                                                     |
| Study duration            | 6-week run-in period. 26 weeks                                                                                                                                                                                                                                                                                                                                                           |
| Trial registration:       | NCT00292877                                                                                                                                                                                                                                                                                                                                                                              |
| Study Population          | Participants: mepolizumab group, n=9; placebo group, n=11<br>Eligibility criteria: patients of the age 18-70 years, who have been found to require a minimum dose of prednisone treatment (in addition to high-dose inhaled steroid treatment) to prevent frequent exacerbations associated with induced sputum eosinophilia; on the same doses of corticosteroids for a least one-month |
| Setting                   | Hamilton, Ontario, Canada                                                                                                                                                                                                                                                                                                                                                                |
| Interventions             | Mepolizumab 750mg or an identical placebo (normal saline diluent) was given intravenously over a 30-minute period at weeks 2, 6, 10, 14, and 18                                                                                                                                                                                                                                          |
| Adherence reported yes/no | No                                                                                                                                                                                                                                                                                                                                                                                       |
| Primary outcomes          | The proportion of patients with exacerbations in each study group and the mean reduction in the dose of prednisone as a percentage of the maximum possible reduction                                                                                                                                                                                                                     |
| Secondary outcomes        | The reduction in the number of eosinophils in sputum and blood in phase 1; the time to an exacerbation, a reduction in the number of sputum and blood eosinophils, and changes in FEV1 and symptom scores in phase 2; and a reduction in the number of sputum and blood eosinophils and changes in FEV1 and symptoms in phase 3                                                          |



|                           |                                                                                                                                                                                                                                                                                                                                                                                                                                                                                                                                                                                                                                                                                                                                                                                                                                                                                                                                                                                                                                                                                                                                                                                                                                                                                                                                                                                                                                                                                                                                                                                                                                                                                                                                                                             |
|---------------------------|-----------------------------------------------------------------------------------------------------------------------------------------------------------------------------------------------------------------------------------------------------------------------------------------------------------------------------------------------------------------------------------------------------------------------------------------------------------------------------------------------------------------------------------------------------------------------------------------------------------------------------------------------------------------------------------------------------------------------------------------------------------------------------------------------------------------------------------------------------------------------------------------------------------------------------------------------------------------------------------------------------------------------------------------------------------------------------------------------------------------------------------------------------------------------------------------------------------------------------------------------------------------------------------------------------------------------------------------------------------------------------------------------------------------------------------------------------------------------------------------------------------------------------------------------------------------------------------------------------------------------------------------------------------------------------------------------------------------------------------------------------------------------------|
| Study reference           | Nair (Benralizumab) 2017                                                                                                                                                                                                                                                                                                                                                                                                                                                                                                                                                                                                                                                                                                                                                                                                                                                                                                                                                                                                                                                                                                                                                                                                                                                                                                                                                                                                                                                                                                                                                                                                                                                                                                                                                    |
| Study title               | Oral Glucocorticoid-Sparing Effect of Benralizumab in Severe Asthma                                                                                                                                                                                                                                                                                                                                                                                                                                                                                                                                                                                                                                                                                                                                                                                                                                                                                                                                                                                                                                                                                                                                                                                                                                                                                                                                                                                                                                                                                                                                                                                                                                                                                                         |
| Study duration            | 8-week run-in period. 28 weeks                                                                                                                                                                                                                                                                                                                                                                                                                                                                                                                                                                                                                                                                                                                                                                                                                                                                                                                                                                                                                                                                                                                                                                                                                                                                                                                                                                                                                                                                                                                                                                                                                                                                                                                                              |
| Trial registration:       | NCT02075255                                                                                                                                                                                                                                                                                                                                                                                                                                                                                                                                                                                                                                                                                                                                                                                                                                                                                                                                                                                                                                                                                                                                                                                                                                                                                                                                                                                                                                                                                                                                                                                                                                                                                                                                                                 |
| Study Population          | <p>Participants: benralizumab, 4-weekly group, n=72; benralizumab 8-weekly group, n =73; placebo group, n=75</p> <p>Eligibility criteria: female and male aged from 18 to 75 years; physician-diagnosed asthma requiring treatment with medium- to high-dose ICS (total daily dose equivalent to &gt;250 µg fluticasone dry powder formulation) and LABA for ≥12 months prior to enrolment; documented treatment with high-dose inhaled glucocorticoid total daily dose equivalent to &gt;500 µg fluticasone dry powder formulation) and LABA for ≥ 6 months prior to enrolment; peripheral blood eosinophil count of ≥150 cells/µl; chronic oral glucocorticoid therapy for ≥6 continuous months directly preceding enrolment( patients must have been receiving doses equivalent to 7.5–40 mg/d of prednisolone/prednisone at visit 1 and must have been on a stable dose for ≥2 weeks before randomization); evidence of asthma as documented by: (Airway reversibility (FEV1 ≥12% and 200 mL) demonstrated at visit 1, visit 2, or visit 3 (week –10, –8, or –6) using the Maximum Post-bronchodilator Procedure, or documented reversibility in the previous 24 months prior to enrolment, or Airway hyper-responsiveness (provocative concentration of methacholine causing a 20% drop in FEV1 methacholine concentration ≤8 mg/ml) documented in the previous 12 months prior to planned date of randomization, or Airflow variability in clinic FEV1 ≥20% between two consecutive clinic visits documented in the 12 months prior to the planned date of randomization (FEV1 recorded during an exacerbation were considered for this criterion); At least one documented asthma exacerbation in the 12 months prior to the date informed consent was obtained.</p> |
| Setting                   | Argentina, Bulgaria, Canada, Chile, France, Germany, South Korea, Poland, Spain, Turkey, Ukraine, United States.                                                                                                                                                                                                                                                                                                                                                                                                                                                                                                                                                                                                                                                                                                                                                                                                                                                                                                                                                                                                                                                                                                                                                                                                                                                                                                                                                                                                                                                                                                                                                                                                                                                            |
| Interventions             | Subcutaneous injections of benralizumab at a dose of 30 mg every 4 weeks, benralizumab at a dose of 30 mg administered every 4 weeks for the first three doses and then every 8 weeks (with placebo administered at the 4-week interim visits; hereafter referred to as the group that received benralizumab every 8 weeks),or placebo administered every 4 weeks                                                                                                                                                                                                                                                                                                                                                                                                                                                                                                                                                                                                                                                                                                                                                                                                                                                                                                                                                                                                                                                                                                                                                                                                                                                                                                                                                                                                           |
| Adherence reported yes/no | Yes                                                                                                                                                                                                                                                                                                                                                                                                                                                                                                                                                                                                                                                                                                                                                                                                                                                                                                                                                                                                                                                                                                                                                                                                                                                                                                                                                                                                                                                                                                                                                                                                                                                                                                                                                                         |
| Primary outcomes          | The percentage reduction in the oral glucocorticoid dose from baseline (randomization at week 0) to the final dose at the end of the maintenance phase (week 28) while asthma control was maintained                                                                                                                                                                                                                                                                                                                                                                                                                                                                                                                                                                                                                                                                                                                                                                                                                                                                                                                                                                                                                                                                                                                                                                                                                                                                                                                                                                                                                                                                                                                                                                        |
| Secondary outcomes        | The percentages of patients who had a reduction in the average daily oral glucocorticoid dose of 25% or more, of 50% or more, or of 100% (discontinuation of oral glucocorticoid therapy) from baseline to end of the maintenance phase and                                                                                                                                                                                                                                                                                                                                                                                                                                                                                                                                                                                                                                                                                                                                                                                                                                                                                                                                                                                                                                                                                                                                                                                                                                                                                                                                                                                                                                                                                                                                 |

|  |                                                                                                                                                                                                                                                                                                                                                                                                                                                  |
|--|--------------------------------------------------------------------------------------------------------------------------------------------------------------------------------------------------------------------------------------------------------------------------------------------------------------------------------------------------------------------------------------------------------------------------------------------------|
|  | the percentage of patients with an average final oral glucocorticoid dose of 5.0 mg or less per day while asthma control was maintained; the annual asthma exacerbation rate, the time to the first asthma exacerbation, the percentage of patients with at least one asthma exacerbation (including exacerbations associated with emergency department visits or hospitalization), the pre-bronchodilator FEV1, ACQ-6 score, and the AQLQ score |
|--|--------------------------------------------------------------------------------------------------------------------------------------------------------------------------------------------------------------------------------------------------------------------------------------------------------------------------------------------------------------------------------------------------------------------------------------------------|

|                           |                                                                                                                                                                                                                                                                                                                                                                                                                                                  |
|---------------------------|--------------------------------------------------------------------------------------------------------------------------------------------------------------------------------------------------------------------------------------------------------------------------------------------------------------------------------------------------------------------------------------------------------------------------------------------------|
| Study reference           | Nizankowska (Cyclosporin) 1995                                                                                                                                                                                                                                                                                                                                                                                                                   |
| Study title               | Treatment of steroid-dependent bronchial asthma with cyclosporin                                                                                                                                                                                                                                                                                                                                                                                 |
| Study duration            | 12-week baseline period. 42 weeks                                                                                                                                                                                                                                                                                                                                                                                                                |
| Trial registration:       | Not documented                                                                                                                                                                                                                                                                                                                                                                                                                                   |
| Study Population          | Participants: Cyclosporin group, n=34; placebo group, n=17<br>Eligibility criteria: non-smoking adults aged 25–57 years; severe chronic asthma; required long-term oral steroid treatment at a minimum dose of 5–35 mg daily, in addition to standard therapy consisting of theophylline, inhaled beclomethasone and $\beta$ -mimetics; Airflow variability of $\geq 15\%$ increase in FEV1 or in PEF following 200 $\mu$ g fenoterol inhalation |
| Setting                   | Poland                                                                                                                                                                                                                                                                                                                                                                                                                                           |
| Interventions             | Cyclosporin or placebo for 12 weeks                                                                                                                                                                                                                                                                                                                                                                                                              |
| Adherence reported yes/no | No                                                                                                                                                                                                                                                                                                                                                                                                                                               |
| Primary outcomes          | Outcomes: asthma symptoms score, (daily peak expiratory flow PEF and bi-weekly FVC, FEV1 and maximal mid- expiratory flow (MEF50), biochemical profile and blood cyclosporin                                                                                                                                                                                                                                                                     |
| Secondary outcomes        | Not specified                                                                                                                                                                                                                                                                                                                                                                                                                                    |

|                           |                                                                                                                                                                                                                                                                                                                                                                                                                                                                                                                                                                   |
|---------------------------|-------------------------------------------------------------------------------------------------------------------------------------------------------------------------------------------------------------------------------------------------------------------------------------------------------------------------------------------------------------------------------------------------------------------------------------------------------------------------------------------------------------------------------------------------------------------|
| Study reference           | Ogiralala (IM triamcinolone) 1995                                                                                                                                                                                                                                                                                                                                                                                                                                                                                                                                 |
| Study title               | Single, High-dose Intramuscular Triamcinolone Acetonide versus Weekly Oral Methotrexate in Life-threatening Asthma: A Double-blind Study                                                                                                                                                                                                                                                                                                                                                                                                                          |
| Study duration            | 2-month 28 weeks 5 months                                                                                                                                                                                                                                                                                                                                                                                                                                                                                                                                         |
| Trial registration:       | Not documented                                                                                                                                                                                                                                                                                                                                                                                                                                                                                                                                                    |
| Study Population          | <p>Participants: 360-mg dose of triamcinolone 360mg dose, n=6; Placebo triamcinolone group, n=7; control group, n = 6</p> <p>Eligibility criteria: patients of either sex between the ages of 21 and 70 years, with a diagnosis of asthma as per ATS criteria; on chronic steroid therapy (at least 5 mg of prednisone or its equivalent daily) during the year prior to entry into the study; a history of life-threatening asthma attacks (requiring mechanical ventilation or treatment in the intensive care unit) at least once in the preceding 4 years</p> |
| Setting                   | United states                                                                                                                                                                                                                                                                                                                                                                                                                                                                                                                                                     |
| Interventions             | <p>Group 1: a single 360-mg dose of triamcinolone acetonide intramuscularly, followed by placebo methotrexate tablets taken orally each week for 6 months</p> <p>Group 2: placebo (normal saline) triamcinolone injection at entry, followed by oral methotrexate at a dose of 7.5mg the first week, followed by 15 mg every week for 6 months</p> <p>Group3: control group, receiving a placebo triamcinolone injection on the first day, followed by placebo-methotrexate tablets each week for the ensuing 6 months</p>                                        |
| Adherence reported yes/no | No                                                                                                                                                                                                                                                                                                                                                                                                                                                                                                                                                                |
| Primary outcomes          | Outcomes: FEV1, PEF, PC20                                                                                                                                                                                                                                                                                                                                                                                                                                                                                                                                         |
| Secondary outcomes        |                                                                                                                                                                                                                                                                                                                                                                                                                                                                                                                                                                   |

|                           |                                                                                                                                                                                                                                                                                                                                                                                                                                                                                                                                                                                                                                                                                                                                                                                                                                                                                                                                                             |
|---------------------------|-------------------------------------------------------------------------------------------------------------------------------------------------------------------------------------------------------------------------------------------------------------------------------------------------------------------------------------------------------------------------------------------------------------------------------------------------------------------------------------------------------------------------------------------------------------------------------------------------------------------------------------------------------------------------------------------------------------------------------------------------------------------------------------------------------------------------------------------------------------------------------------------------------------------------------------------------------------|
| Study reference           | Oh (MEDI528) 2013                                                                                                                                                                                                                                                                                                                                                                                                                                                                                                                                                                                                                                                                                                                                                                                                                                                                                                                                           |
| Study title               | A randomized, controlled trial to evaluate the effect of an anti-interleukin-9 monoclonal antibody in adults with uncontrolled asthma                                                                                                                                                                                                                                                                                                                                                                                                                                                                                                                                                                                                                                                                                                                                                                                                                       |
| Study duration            | 4-week screening period, a 13-week steroid stable treatment period, an 11-week steroid reduction treatment period, and a 22-week follow-up period                                                                                                                                                                                                                                                                                                                                                                                                                                                                                                                                                                                                                                                                                                                                                                                                           |
| Trial registration:       | NCT00968669                                                                                                                                                                                                                                                                                                                                                                                                                                                                                                                                                                                                                                                                                                                                                                                                                                                                                                                                                 |
| Study Population          | <p>Participants: MEDI-528 30mg group, n=80; MEDI-528 100mg group, n=80, or MEDI-528 300 mg group, n=80; placebo group, n=80</p> <p>Eligibility criteria: patients of the age 18–65 years with BMI of 18–35 kg/m<sup>2</sup> and a clinical diagnosis of asthma, confirmed by pre-bronchodilator FEV<sub>1</sub> of <math>\geq 40\%</math> predicted and post-bronchodilator FEV<sub>1</sub> reversibility <math>\geq 12\%</math> and <math>\geq 200</math> mL; poor asthma symptom control (ACQ-6 score of <math>\geq 1.5</math>; daytime symptoms on <math>\geq 2</math> days/week, night-time awakening <math>\geq 1</math> night/week, rescue medication use on <math>\geq 2</math> days/week); <math>\geq 1</math> asthma exacerbation in the past year; medium to high-dose ICS or were eligible to take them based on Expert Panel Report 3 guidelines, and were started on medium to high-dose ICS at the start of the run-in phase of the study</p> |
| Setting                   | 53 sites in North America, Central America, South America, and Asia                                                                                                                                                                                                                                                                                                                                                                                                                                                                                                                                                                                                                                                                                                                                                                                                                                                                                         |
| Interventions             | Placebo or one of three doses of MEDI-528 (30, 100, or 300 mg) subcutaneously every 2 weeks for 24 weeks (13 doses)                                                                                                                                                                                                                                                                                                                                                                                                                                                                                                                                                                                                                                                                                                                                                                                                                                         |
| Adherence reported yes/no | No                                                                                                                                                                                                                                                                                                                                                                                                                                                                                                                                                                                                                                                                                                                                                                                                                                                                                                                                                          |
| Primary outcomes          | The change from baseline in mean ACQ-6 score at week 13 among individual MEDI-528 treatment groups and placebo                                                                                                                                                                                                                                                                                                                                                                                                                                                                                                                                                                                                                                                                                                                                                                                                                                              |
| Secondary outcomes        | The change from baseline in mean ACQ-6 score at week 25, asthma exacerbation rates (week 25), pre-bronchodilator FEV <sub>1</sub> (weeks 13 and 25), AQLQ scores; weeks 12 and 25), and the safety of MEDI-528 throughout the study period                                                                                                                                                                                                                                                                                                                                                                                                                                                                                                                                                                                                                                                                                                                  |

|                           |                                                                                                                                                                                                                                                                                                                                                                                                                                                                                                                                                                                                                                                                                                                                                                                                                                                                                                                                                                  |
|---------------------------|------------------------------------------------------------------------------------------------------------------------------------------------------------------------------------------------------------------------------------------------------------------------------------------------------------------------------------------------------------------------------------------------------------------------------------------------------------------------------------------------------------------------------------------------------------------------------------------------------------------------------------------------------------------------------------------------------------------------------------------------------------------------------------------------------------------------------------------------------------------------------------------------------------------------------------------------------------------|
| Study reference           | Ohta (Omalizumab) 2009                                                                                                                                                                                                                                                                                                                                                                                                                                                                                                                                                                                                                                                                                                                                                                                                                                                                                                                                           |
| Study title               | Efficacy and safety of omalizumab in an Asian population with moderate-to-severe persistent asthma                                                                                                                                                                                                                                                                                                                                                                                                                                                                                                                                                                                                                                                                                                                                                                                                                                                               |
| Study duration            | 2-week pre-treatment period, 16-week treatment period and 12-week follow up                                                                                                                                                                                                                                                                                                                                                                                                                                                                                                                                                                                                                                                                                                                                                                                                                                                                                      |
| Trial registration:       | Not documented                                                                                                                                                                                                                                                                                                                                                                                                                                                                                                                                                                                                                                                                                                                                                                                                                                                                                                                                                   |
| Study Population          | Participants: omalizumab group, n=158; placebo group, n=169<br>Eligibility criteria: patients (aged 20–75 years) with moderate-to-severe asthma according to the GINA guidelines; treated with beclomethasone dipropionate chlorofluorocarbon (CFC)-containing metered-dose inhaler at 800 mg/day (or equivalent), and one or more of the following additional controller medications recommended as step 3 and step 4 treatments LABA (sustained-release theophylline, leukotriene receptor antagonist (LTRA), oral corticosteroid); positive skin test or in vitro reactivity to a perennial aeroallergen; serum total IgE of 30–700 IU/mL; insufficient asthma control, ( asthma symptoms interfere with night-time sleep one day/week or asthma symptoms restrict daily activities or rescue medication/SABA needed one day/week or PEF diurnal variation 20% on one day/week or FEV1 or mean PEF value in the range of 40–80% of the predicted normal value |
| Setting                   | Japan                                                                                                                                                                                                                                                                                                                                                                                                                                                                                                                                                                                                                                                                                                                                                                                                                                                                                                                                                            |
| Interventions             | Omalizumab subcutaneous injection every two or four weeks according to the patient's pre-treatment bodyweight and baseline IgE levels, using a dosing table to provide a dose of at least 0.016 mg/kg per IU/mL of IgE or placebo                                                                                                                                                                                                                                                                                                                                                                                                                                                                                                                                                                                                                                                                                                                                |
| Adherence reported yes/no | No                                                                                                                                                                                                                                                                                                                                                                                                                                                                                                                                                                                                                                                                                                                                                                                                                                                                                                                                                               |
| Primary outcomes          | The change from baseline in morning PEF (L/min), as recorded on diary cards at 16 weeks                                                                                                                                                                                                                                                                                                                                                                                                                                                                                                                                                                                                                                                                                                                                                                                                                                                                          |
| Secondary outcomes        | The change from baseline in FEV1, asthma symptom score, daily activity score, sleep score and rescue medication use, clinically significant asthma exacerbations at week 16                                                                                                                                                                                                                                                                                                                                                                                                                                                                                                                                                                                                                                                                                                                                                                                      |

|                           |                                                                                                                                                                                                                                                                                                                                                                                                                                               |
|---------------------------|-----------------------------------------------------------------------------------------------------------------------------------------------------------------------------------------------------------------------------------------------------------------------------------------------------------------------------------------------------------------------------------------------------------------------------------------------|
| Study reference           | Ortega (Mepolizumab) 2014                                                                                                                                                                                                                                                                                                                                                                                                                     |
| Study title               | Mepolizumab Treatment in Patients with Severe Eosinophilic Asthma                                                                                                                                                                                                                                                                                                                                                                             |
| Study duration            | 1-6 weeks run-in period, 32-week treatment intervention and 8-week follow-up                                                                                                                                                                                                                                                                                                                                                                  |
| Trial registration:       | NCT01691521                                                                                                                                                                                                                                                                                                                                                                                                                                   |
| Study Population          | Participants: mepolizumab 75 mg group, n=191; mepolizumab 100 mg group, n=194; placebo group, n= 191<br>Eligibility criteria: Blood eosinophils $\geq 150$ cells/ $\mu$ L at screening or $\geq 300$ cells/ $\mu$ L in previous 12 months; $\geq 2$ exacerbations in previous 12 months; FEV1 $< 80\%$ ; maintenance treatment with high-dose ICS for $\geq 12$ months; plus additional controller for $\geq 3$ months; $\pm$ maintenance OCS |
| Setting                   | Baltimore, Middlesex, Ghent, Vancouver, Parma, Marseille and Paris                                                                                                                                                                                                                                                                                                                                                                            |
| Interventions             | Mepolizumab in a 75 mg intravenous dose versus mepolizumab in a 100 mg subcutaneous dose versus placebo every 4 weeks for 32 weeks                                                                                                                                                                                                                                                                                                            |
| Adherence reported yes/no | No                                                                                                                                                                                                                                                                                                                                                                                                                                            |
| Primary outcomes          | Number of annualized frequency of clinically significant exacerbations                                                                                                                                                                                                                                                                                                                                                                        |
| Secondary outcomes        | Number of clinically significant exacerbations requiring hospitalisation (including intubation and admittance to an intensive care unit ) or ED visits per year<br>Mean change from baseline in clinic pre-bronchodilator FEV1 at week 32<br>Mean change from baseline in the SGRQ total score at week 32                                                                                                                                     |

|                           |                                                                                                                                                                                                                                                                                                                                                                                                                                                                                                                                                                                                                |
|---------------------------|----------------------------------------------------------------------------------------------------------------------------------------------------------------------------------------------------------------------------------------------------------------------------------------------------------------------------------------------------------------------------------------------------------------------------------------------------------------------------------------------------------------------------------------------------------------------------------------------------------------|
| Study reference           | Park (Benralizumab) 2016                                                                                                                                                                                                                                                                                                                                                                                                                                                                                                                                                                                       |
| Study title               | A Phase 2a Study of Benralizumab for Patients with Eosinophilic Asthma in South Korea and Japan                                                                                                                                                                                                                                                                                                                                                                                                                                                                                                                |
| Study duration            | 52 weeks                                                                                                                                                                                                                                                                                                                                                                                                                                                                                                                                                                                                       |
| Trial registration:       | NCT01238861                                                                                                                                                                                                                                                                                                                                                                                                                                                                                                                                                                                                    |
| Study Population          | Participants: benralizumab 2 mg group, n=26; benralizumab 20 mg group, n=25; benralizumab 100 mg group, n=26; placebo group, n=26<br>Eligibility criteria: moderate/severe (based on ICS dose (medium/high); post-bronchodilator FEV1 reversibility $\geq 12\%$ and $\geq 200$ mL, or a positive response to methacholine challenge ( $PC_{20} \leq 8$ mg/mL); 2-6 exacerbations in the previous 12 months; ACQ-6 score $\geq 1.5$ at least twice during screening; morning pre-bronchodilator FEV1 40%-90%; maintenance treatment with medium- to high-dose ICS in combination with LABA for $\geq 12$ months |
| Setting                   | 32 sites in South Korea and Japan                                                                                                                                                                                                                                                                                                                                                                                                                                                                                                                                                                              |
| Interventions             | Subcutaneous doses given at weeks 1, 4, 8, 16, 24, 32, 40. Benralizumab 2 mg, 20 mg or 100 mg subcutaneously                                                                                                                                                                                                                                                                                                                                                                                                                                                                                                   |
| Adherence reported yes/no | No                                                                                                                                                                                                                                                                                                                                                                                                                                                                                                                                                                                                             |
| Primary outcomes          | Asthma exacerbation rate at week 52                                                                                                                                                                                                                                                                                                                                                                                                                                                                                                                                                                            |
| Secondary outcomes        | FEV1, PEF, ACQ-6, FeNO, Exploratory endpoints included blood eosinophil counts.                                                                                                                                                                                                                                                                                                                                                                                                                                                                                                                                |

|                           |                                                                                                                                                                                                                                                                                                                                                                                                                                                                                                                                                                                                                                                                                                                                                                                                                                                                                                                                                                                                                                                                                                 |
|---------------------------|-------------------------------------------------------------------------------------------------------------------------------------------------------------------------------------------------------------------------------------------------------------------------------------------------------------------------------------------------------------------------------------------------------------------------------------------------------------------------------------------------------------------------------------------------------------------------------------------------------------------------------------------------------------------------------------------------------------------------------------------------------------------------------------------------------------------------------------------------------------------------------------------------------------------------------------------------------------------------------------------------------------------------------------------------------------------------------------------------|
| Study reference           | Pavord (Bronchial thermoplasty) 2007                                                                                                                                                                                                                                                                                                                                                                                                                                                                                                                                                                                                                                                                                                                                                                                                                                                                                                                                                                                                                                                            |
| Study title               | Safety and Efficacy of Bronchial Thermoplasty in Symptomatic, Severe Asthma                                                                                                                                                                                                                                                                                                                                                                                                                                                                                                                                                                                                                                                                                                                                                                                                                                                                                                                                                                                                                     |
| Study duration            | 2-week run-in period. 52 weeks                                                                                                                                                                                                                                                                                                                                                                                                                                                                                                                                                                                                                                                                                                                                                                                                                                                                                                                                                                                                                                                                  |
| Trial registration:       | NCT 00214539                                                                                                                                                                                                                                                                                                                                                                                                                                                                                                                                                                                                                                                                                                                                                                                                                                                                                                                                                                                                                                                                                    |
| Study Population          | <p>Participants: Bronchial thermoplasty group, n= 15; control group, n= 17</p> <p>Eligibility criteria: patients with asthma aged 18 to 65 years; requirement of high-dose ICS (<math>\geq 750</math> mg fluticasone propionate per day or equivalent) and LABA (at least 100 mg salmeterol per day or equivalent), with or without oral prednisone (<math>&lt; 30</math> mg/d), leukotriene modifiers, or theophylline; prebronchodilator FEV<sub>1</sub> <math>&gt; 50\%</math> of predicted; demonstrable airway hyperresponsiveness by challenge with methacholine or reversible bronchoconstriction during prior 12 months as demonstrated by an increase in FEV<sub>1</sub> of at least 12% 30 minutes after four puffs of a SABA; uncontrolled symptoms despite taking maintenance medication (demonstrated by the use of rescue medication on at least 8 of the 14 days before enrolment, or daytime symptoms on at least 10 of the 14 days before enrolment); and abstinence from smoking for <math>\geq 1</math> year and past smoking history of <math>&lt; 10</math> pack-years</p> |
| Setting                   | 8 investigational sites in three countries; Canada, United Kingdom and Brazil                                                                                                                                                                                                                                                                                                                                                                                                                                                                                                                                                                                                                                                                                                                                                                                                                                                                                                                                                                                                                   |
| Interventions             | Bronchial thermoplasty in addition to ICS/LABA or ICS plus LABA. Bronchial thermoplasty group patients underwent three procedures at least 3 weeks apart                                                                                                                                                                                                                                                                                                                                                                                                                                                                                                                                                                                                                                                                                                                                                                                                                                                                                                                                        |
| Adherence reported yes/no | Yes                                                                                                                                                                                                                                                                                                                                                                                                                                                                                                                                                                                                                                                                                                                                                                                                                                                                                                                                                                                                                                                                                             |
| Primary outcomes          | The safety of BT was assessed by monitoring adverse events and PEF between weeks 6 to 22                                                                                                                                                                                                                                                                                                                                                                                                                                                                                                                                                                                                                                                                                                                                                                                                                                                                                                                                                                                                        |
| Secondary outcomes        | The change in OCS and ICS, use of rescue medication, morning and evening PEF, FEV <sub>1</sub> , PC20 (provocative concentration causing a 20% fall in FEV <sub>1</sub> ), asthma symptom score, symptom-free days, or AQLQ and ACQ scores PEF between weeks 6 to 22                                                                                                                                                                                                                                                                                                                                                                                                                                                                                                                                                                                                                                                                                                                                                                                                                            |



|                           |                                                                                                                                                                                                                                                                                                                                                                                                                                                                                                                                                                                                                                                                                                                                                                                                                                                                                                                                                                                                                                                                                                                                                                          |
|---------------------------|--------------------------------------------------------------------------------------------------------------------------------------------------------------------------------------------------------------------------------------------------------------------------------------------------------------------------------------------------------------------------------------------------------------------------------------------------------------------------------------------------------------------------------------------------------------------------------------------------------------------------------------------------------------------------------------------------------------------------------------------------------------------------------------------------------------------------------------------------------------------------------------------------------------------------------------------------------------------------------------------------------------------------------------------------------------------------------------------------------------------------------------------------------------------------|
| Study reference           | Pavord (Mepolizumab) 2012                                                                                                                                                                                                                                                                                                                                                                                                                                                                                                                                                                                                                                                                                                                                                                                                                                                                                                                                                                                                                                                                                                                                                |
| Study title               | Mepolizumab for severe eosinophilic asthma (DREAM): a multicentre, double-blind, placebo-controlled trial                                                                                                                                                                                                                                                                                                                                                                                                                                                                                                                                                                                                                                                                                                                                                                                                                                                                                                                                                                                                                                                                |
| Study duration            | 52-week                                                                                                                                                                                                                                                                                                                                                                                                                                                                                                                                                                                                                                                                                                                                                                                                                                                                                                                                                                                                                                                                                                                                                                  |
| Trial registration:       | NCT01000506                                                                                                                                                                                                                                                                                                                                                                                                                                                                                                                                                                                                                                                                                                                                                                                                                                                                                                                                                                                                                                                                                                                                                              |
| Study Population          | <p>Participants: mepolizumab 750 mg group, n=156; mepolizumab 250 mg group, n=152; mepolizumab 75 mg group, n=154; placebo group, n=159</p> <p>Eligibility criteria: <math>\geq 3\%</math> sputum eosinophils or blood eosinophil <math>\geq 300</math> cells/<math>\mu</math>L; <math>\geq 2</math> exacerbations in previous 12 months; maintenance treatment with high-dose ICS (i.e. <math>\geq 880</math> <math>\mu</math>g/d FP or equivalent daily); + additional controller; <math>\pm</math> maintenance OCS ;patients were aged 12–74 years and had a clinical diagnosis of asthma supported by one or more other characteristics: variability in diurnal PEF of more than 20% for at least 3 days during the 2-week run-in period; improvement in FEV1 of more than 12% and 200 mL after 200 <math>\mu</math>g inhaled salbutamol at visit one or two, or in the 12 months before study entry; a variability in FEV1 of greater than 20% between two consecutive clinic visits in 12 months; or a provocative concentration of inhaled methacholine needed to reduce FEV1 by 20% (PC20) of 8 mg/mL or less documented in the 12 months before study entry</p> |
| Setting                   | 81 centres in 13 countries; Argentina, Australia, Canada, Chile, France, Germany, South Korea, Poland, Romania, Russia, Ukraine, the United Kingdom and the United States                                                                                                                                                                                                                                                                                                                                                                                                                                                                                                                                                                                                                                                                                                                                                                                                                                                                                                                                                                                                |
| Interventions             | 13 total intravenous infusions of mepolizumab (750 mg), mepolizumab (250 mg), mepolizumab (75 mg) or placebo given every 4 weeks                                                                                                                                                                                                                                                                                                                                                                                                                                                                                                                                                                                                                                                                                                                                                                                                                                                                                                                                                                                                                                         |
| Adherence reported yes/no | No                                                                                                                                                                                                                                                                                                                                                                                                                                                                                                                                                                                                                                                                                                                                                                                                                                                                                                                                                                                                                                                                                                                                                                       |
| Primary outcomes          | The rate of clinically significant asthma exacerbations. Exacerbation events occurring in the 52 weeks between completion of the first treatment visit and 4 weeks after the final treatment visit were included in the analysis                                                                                                                                                                                                                                                                                                                                                                                                                                                                                                                                                                                                                                                                                                                                                                                                                                                                                                                                         |
| Secondary outcomes        | The rate of exacerbations requiring admission, visits to the emergency department, blood and sputum eosinophil counts, mean change from baseline in clinic pre-bronchodilator FEV1, ACQ, AQLQ over the 52-week treatment period, time to first clinically significant exacerbation requiring oral or systemic corticosteroids, hospitalisation, and/or ED visits, frequency of exacerbations requiring hospitalisation (including intubation and admittance to an ICU) or ED visits                                                                                                                                                                                                                                                                                                                                                                                                                                                                                                                                                                                                                                                                                      |

|                           |                                                                                                                                                                                                                                                                                                                                                                                                                                                                                                                                                                                                                                                                                                                         |
|---------------------------|-------------------------------------------------------------------------------------------------------------------------------------------------------------------------------------------------------------------------------------------------------------------------------------------------------------------------------------------------------------------------------------------------------------------------------------------------------------------------------------------------------------------------------------------------------------------------------------------------------------------------------------------------------------------------------------------------------------------------|
| Study reference           | Piper (Tralokinumab) 2013                                                                                                                                                                                                                                                                                                                                                                                                                                                                                                                                                                                                                                                                                               |
| Study title               | A phase II placebo-controlled study of tralokinumab in moderate-to-severe asthma                                                                                                                                                                                                                                                                                                                                                                                                                                                                                                                                                                                                                                        |
| Study duration            | 2-week run-in period. 24 weeks                                                                                                                                                                                                                                                                                                                                                                                                                                                                                                                                                                                                                                                                                          |
| Trial registration:       | NCT01402986                                                                                                                                                                                                                                                                                                                                                                                                                                                                                                                                                                                                                                                                                                             |
| Study Population          | <p>Participants: tralokinumab 150mg group, n=47; tralokinumab 300mg group, n=51; tralokinumab 600mg group, n=48; placebo group, n=48</p> <p>Eligibility criteria: patients age, 18–65 years; BMI of 18–40 kg/m<sup>2</sup> physician-diagnosed, moderate-to-severe uncontrolled asthma; reversible airflow obstruction (post-bronchodilator FEV<sub>1</sub> reversibility <math>\geq 12\%</math> and <math>\geq 200</math> mL either documented within the previous year or at screening); pre-bronchodilator FEV<sub>1</sub> of 40% predicted value; ACQ-6 score of <math>\geq 1.5</math> at screening and randomisation, and one or more asthma exacerbations that required medical intervention in the past year</p> |
| Setting                   | United Kingdom and United states                                                                                                                                                                                                                                                                                                                                                                                                                                                                                                                                                                                                                                                                                        |
| Interventions             | Tralokinumab 150, 300 or 600 mg or placebo. Treatment was administered every 2 weeks by subcutaneous injection                                                                                                                                                                                                                                                                                                                                                                                                                                                                                                                                                                                                          |
| Adherence reported yes/no | Yes                                                                                                                                                                                                                                                                                                                                                                                                                                                                                                                                                                                                                                                                                                                     |
| Primary outcomes          | The change from baseline to week 13 in mean ACQ-6 score                                                                                                                                                                                                                                                                                                                                                                                                                                                                                                                                                                                                                                                                 |
| Secondary outcomes        | Time to asthma control, change from baseline in FEV <sub>1</sub> and peak PEF (at study visit and at home), time to first asthma exacerbation, asthma exacerbation rate, requirement for concomitant asthma rescue medications, daily asthma symptoms scores, AQLQ, pre-bronchodilator FEV <sub>1</sub> , FVC and PEF. Patient-reported outcomes (PROs) included a four-item                                                                                                                                                                                                                                                                                                                                            |

|                           |                                                                                                                                                                                                                                                                                 |
|---------------------------|---------------------------------------------------------------------------------------------------------------------------------------------------------------------------------------------------------------------------------------------------------------------------------|
| Study reference           | Robinson (Montelukast) 2001                                                                                                                                                                                                                                                     |
| Study title               | Addition of leukotriene antagonists to therapy in chronic persistent asthma: a randomised double-blind placebo-controlled trial                                                                                                                                                 |
| Study duration            | 4 weeks                                                                                                                                                                                                                                                                         |
| Trial registration:       | Not documented                                                                                                                                                                                                                                                                  |
| Study Population          | Participants: 100 patients randomised, cross over trial<br>Eligibility criteria: Any patient with a physician diagnosis of asthma in whom the recruiting consultant physician felt a trial of Montelukast was indicated for continued asthma symptoms despite other anti-asthma |
| Setting                   | United Kingdom                                                                                                                                                                                                                                                                  |
| Interventions             | Montelukast sodium or matched placebo capsules for four weeks                                                                                                                                                                                                                   |
| Adherence reported yes/no | No                                                                                                                                                                                                                                                                              |
| Primary outcomes          | Outcomes: PEF; FEV1                                                                                                                                                                                                                                                             |

|                           |                                                                                                                                                                                                                                                                                                                                                                                                                                                     |
|---------------------------|-----------------------------------------------------------------------------------------------------------------------------------------------------------------------------------------------------------------------------------------------------------------------------------------------------------------------------------------------------------------------------------------------------------------------------------------------------|
| Study reference           | Rubin (Omalizumab) 2012                                                                                                                                                                                                                                                                                                                                                                                                                             |
| Study title               | Effect of Omalizumab as Add-On Therapy on Asthma-Related Quality of Life in Severe Allergic Asthma: A Brazilian Study (QUALITX)                                                                                                                                                                                                                                                                                                                     |
| Study duration            | 20 weeks                                                                                                                                                                                                                                                                                                                                                                                                                                            |
| Trial registration:       |                                                                                                                                                                                                                                                                                                                                                                                                                                                     |
| Study Population          | Participants: Omalizumab group, n=78; control group, n=38<br>Eligibility criteria: patients of the age 12 and 75 years; severe persistent asthma as per GINA guidelines; uncontrolled despite treatment with, at least, ICS ( 500 µg/day of fluticasone equivalent) and LABA; 20 and 150 kg body weight; serum total IgE levels between 30 and 700 IU/mL; positive skin prick test (diameter of wheal 3 mm) for at least one perennial aeroallergen |
| Setting                   | Brazil                                                                                                                                                                                                                                                                                                                                                                                                                                              |
| Interventions             | Omalizumab+ LABA + ICS or the control group (LABA + ICS). Omalizumab 150–375 mg was administered subcutaneously every 2 or 4 weeks                                                                                                                                                                                                                                                                                                                  |
| Adherence reported yes/no | No                                                                                                                                                                                                                                                                                                                                                                                                                                                  |
| Primary outcomes          | The mean change from baseline in overall AQLQ score in omalizumab-treated patients compared with the control group mean change at week 12 and at week 20                                                                                                                                                                                                                                                                                            |
| Secondary outcomes        | Rescue medication use, incidence of asthma exacerbations, perception of treatment efficacy among patients, mean change from baseline in AQLQ score, and >1.5-point increase in overall AQLQ score percentage of patients with a >1.5-point increase from baseline in the overall AQLQ; FEV1, FVC, Global Evaluation of Treatment Effectiveness                                                                                                      |

|                           |                                                                                                                                                                                                                                                                                                                                                                                                                                     |
|---------------------------|-------------------------------------------------------------------------------------------------------------------------------------------------------------------------------------------------------------------------------------------------------------------------------------------------------------------------------------------------------------------------------------------------------------------------------------|
| Study reference           | Salmun (IVIG) 1999                                                                                                                                                                                                                                                                                                                                                                                                                  |
| Study title               | Effect of intravenous immunoglobulin on steroid consumption in patients with severe asthma: A double-blind , placebo controlled randomized trial                                                                                                                                                                                                                                                                                    |
| Study duration            | 3 months                                                                                                                                                                                                                                                                                                                                                                                                                            |
| Trial registration:       | Not documented                                                                                                                                                                                                                                                                                                                                                                                                                      |
| Study Population          | Participants: Immune Globulin Intravenous 5% group, n=16, placebo group, n=12<br>Eligibility criteria: Age 5 to 35 years with a clinical diagnosis of asthma per ATS criteria; steroid dependent asthma (patients who required oral steroid on a daily or alternate day basis for at least 6 months before study entry or patients who required at least 30 days of oral steroids per year despite chronic use of inhaled steroids) |
| Setting                   | Massachusetts, Turkey, Austria                                                                                                                                                                                                                                                                                                                                                                                                      |
| Interventions             | Iveegam Immune Globulin Intravenous 5%, and 5% albumin was the placebo                                                                                                                                                                                                                                                                                                                                                              |
| Adherence reported yes/no | No                                                                                                                                                                                                                                                                                                                                                                                                                                  |
| Primary outcomes          | Comparison of dosage of oral steroids consumed at baseline (first 3 months of the study) and a during the treatment phase (the last 3months of the study).                                                                                                                                                                                                                                                                          |
| Secondary outcomes        | Comparison of dosage other medication use, parameters of clinical symptomatology, and pulmonary function tests at baseline( first 3 months of the study) and a during the treatment phase ( the last 3months of the study)                                                                                                                                                                                                          |

|                           |                                                                                                                                                                                                                                                                                                                                                                                                                                                                                                                                                                                                                                                                                                                                                                                              |
|---------------------------|----------------------------------------------------------------------------------------------------------------------------------------------------------------------------------------------------------------------------------------------------------------------------------------------------------------------------------------------------------------------------------------------------------------------------------------------------------------------------------------------------------------------------------------------------------------------------------------------------------------------------------------------------------------------------------------------------------------------------------------------------------------------------------------------|
| Study reference           | Sano (Sodium cromoglycate) 2006                                                                                                                                                                                                                                                                                                                                                                                                                                                                                                                                                                                                                                                                                                                                                              |
| Study title               | Effects of nebulized sodium cromoglycate on adult patients with severe refractory asthma                                                                                                                                                                                                                                                                                                                                                                                                                                                                                                                                                                                                                                                                                                     |
| Study duration            | 2-week observation period. 10 weeks                                                                                                                                                                                                                                                                                                                                                                                                                                                                                                                                                                                                                                                                                                                                                          |
| Trial registration:       | Not documented                                                                                                                                                                                                                                                                                                                                                                                                                                                                                                                                                                                                                                                                                                                                                                               |
| Study Population          | Participants: sodium cromoglycate group, n =114, placebo group, n =114<br>Eligibility criteria: Patients of the age $\geq 20$ ; severe persistent asthma; Step 4 therapy according to the Classification for Asthma Severity in the Asthma Prevention and Management Guidelines 20001 in Japan; ICS regiment : 4800 mg/day of inhaled beclomethasone dipropionate (BDP-CFC), 4400 mg/day of inhaled fluticasone propionate (FP-DPI), or 4400 mg/day of inhaled budesonide (BUD-DPI); mean morning PEF during the observation period $< 80\%$ of normal predicted value, or diurnal variation in PEF during the observation period $> 20\%$ were evaluated at least 2 days/each week; asthmatic symptoms (wheezing, dyspnoea, or slight asthmatic attack) were reported at least 2 times/week |
| Setting                   | 30 medical centres in Japan                                                                                                                                                                                                                                                                                                                                                                                                                                                                                                                                                                                                                                                                                                                                                                  |
| Interventions             | Sodium cromoglycate or isotonic saline was used as placebo                                                                                                                                                                                                                                                                                                                                                                                                                                                                                                                                                                                                                                                                                                                                   |
| Adherence reported yes/no | No                                                                                                                                                                                                                                                                                                                                                                                                                                                                                                                                                                                                                                                                                                                                                                                           |
| Primary outcomes          | The percentage change from baseline at the end of the treatment in morning PEF at 2, 4, 6, 8 and 10 weeks                                                                                                                                                                                                                                                                                                                                                                                                                                                                                                                                                                                                                                                                                    |
| Secondary outcomes        | The change in FVC, FEV1, PEF, asthmatic symptom score, QOL at baseline, 4, 8 and 10 weeks                                                                                                                                                                                                                                                                                                                                                                                                                                                                                                                                                                                                                                                                                                    |

|                           |                                                                                                                                                                                                                                                                                                                                                                                                                                                                                                                                                                                                                                                                                                                                                    |
|---------------------------|----------------------------------------------------------------------------------------------------------------------------------------------------------------------------------------------------------------------------------------------------------------------------------------------------------------------------------------------------------------------------------------------------------------------------------------------------------------------------------------------------------------------------------------------------------------------------------------------------------------------------------------------------------------------------------------------------------------------------------------------------|
| Study reference           | Bosquet (Omalizumab) 2011                                                                                                                                                                                                                                                                                                                                                                                                                                                                                                                                                                                                                                                                                                                          |
| Study title               | Persistency of response to Omalizumab therapy in severe allergic (IgE-mediated) asthma                                                                                                                                                                                                                                                                                                                                                                                                                                                                                                                                                                                                                                                             |
| Study duration            | 8-week run-in period. 32 weeks                                                                                                                                                                                                                                                                                                                                                                                                                                                                                                                                                                                                                                                                                                                     |
| Trial registration:       | Not documented                                                                                                                                                                                                                                                                                                                                                                                                                                                                                                                                                                                                                                                                                                                                     |
| Study Population          | Participants: Omalizumab group, n=272, Optimised asthma therapy (OAT) group, n=128<br>Eligibility criteria: patients of the aged 12-75 years, with severe allergic asthma; $\geq 2$ severe asthma exacerbations (requiring treatment with systemic corticosteroids) while receiving $\geq 800\mu\text{g}$ beclomethasone dipropionate or equivalent plus LABA during the 3 years prior to screening, with $\geq 1$ severe exacerbation within the previous year; body weight of 20-150kg and baseline serum IgE level of 30-700IU/ml; positive skin prick or radio-allergosorbent test to at least one perennial allergen; $\geq 12\%$ reversibility in FEV1 within taking 2-4x100 $\mu\text{g}$ salbutamol; FEV1 between 40% and 80% of predicted |
| Setting                   | 106 centres in 14 countries; Belgium, Canada, Denmark, Germany, Hungary, Israel, Italy, Norway, Poland, Spain, Sweden, turkey, United Kingdom and Switzerland                                                                                                                                                                                                                                                                                                                                                                                                                                                                                                                                                                                      |
| Interventions             | Optimised asthma therapy (OAT) or optimised asthma therapy and omalizumab                                                                                                                                                                                                                                                                                                                                                                                                                                                                                                                                                                                                                                                                          |
| Adherence reported yes/no | No                                                                                                                                                                                                                                                                                                                                                                                                                                                                                                                                                                                                                                                                                                                                                 |
| Primary outcomes          | The persistency rate of response in patients receiving omalizumab at weeks 16 and 32                                                                                                                                                                                                                                                                                                                                                                                                                                                                                                                                                                                                                                                               |
| Secondary outcomes        | Persistency rates of non-response in patients receiving omalizumab at weeks 16 and 32; persistency rates of response/nonresponse in patients receiving OAT alone; patients' GETE at weeks 16 and 32; change from baseline in FEV1 and %-predicted at weeks 16 and 32; clinically significant asthma exacerbations over the 32-week treatment period; severe exacerbations over the 32-week treatment period; hospitalizations and total emergency room visits because of asthma exacerbation over the 32-week treatment period; change from baseline ACQ overall score which was assessed at weeks 16 and 32; change from baseline at week 32 in the number of night in the previous 2 weeks with an awakening requiring rescue medication         |

|                           |                                                                                                                                                                                                                                                   |
|---------------------------|---------------------------------------------------------------------------------------------------------------------------------------------------------------------------------------------------------------------------------------------------|
| Study reference           | Simpson (Clarithromycin) 2008                                                                                                                                                                                                                     |
| Study title               | Clarithromycin Targets Neutrophilic Airway Inflammation in Refractory Asthma                                                                                                                                                                      |
| Study duration            | 12-week run-in period. 8 weeks treatment period                                                                                                                                                                                                   |
| Trial registration:       | No. 12605000318684                                                                                                                                                                                                                                |
| Study Population          | Participants: Clarithromycin group, n=23; placebo group, n=23<br>Eligibility criteria: Non-smoking adults with symptomatic refractory asthma according to GINA guidelines, with demonstrated airway hyperresponsiveness to hypertonic saline      |
| Setting                   | Australia                                                                                                                                                                                                                                         |
| Interventions             | Oral clarithromycin 500 mg twice daily (Klacid; Abbot Australasia, Botany NSW, Australia) or placebo duration of treatment                                                                                                                        |
| Adherence reported yes/no | No                                                                                                                                                                                                                                                |
| Primary outcomes          | IL-8 levels in sputum supernatant after 8 weeks of treatment                                                                                                                                                                                      |
| Secondary outcomes        | The sputum neutrophil numbers, neutrophil elastase and matrix metalloproteinase (MMP)-9 levels, FEV1% predicted, dose-response slope to hypertonic saline, symptom severity, asthma control score, and asthma quality-of-life questionnaire score |



|                           |                                                                                                                                                                                                                                                                                                                                                                                                                                                                                                                                                                                                                                                                                                                                                                                                                                                                                                                  |
|---------------------------|------------------------------------------------------------------------------------------------------------------------------------------------------------------------------------------------------------------------------------------------------------------------------------------------------------------------------------------------------------------------------------------------------------------------------------------------------------------------------------------------------------------------------------------------------------------------------------------------------------------------------------------------------------------------------------------------------------------------------------------------------------------------------------------------------------------------------------------------------------------------------------------------------------------|
| Study reference           | Smith (Isoflavane) 2015                                                                                                                                                                                                                                                                                                                                                                                                                                                                                                                                                                                                                                                                                                                                                                                                                                                                                          |
| Study title               | Effect of a Soy Isoflavone Supplement on Lung Function and Clinical Outcomes in Patients with Poorly Controlled Asthma A Randomized Clinical Trial                                                                                                                                                                                                                                                                                                                                                                                                                                                                                                                                                                                                                                                                                                                                                               |
| Study duration            | 6 months                                                                                                                                                                                                                                                                                                                                                                                                                                                                                                                                                                                                                                                                                                                                                                                                                                                                                                         |
| Trial registration:       | NCT01052116                                                                                                                                                                                                                                                                                                                                                                                                                                                                                                                                                                                                                                                                                                                                                                                                                                                                                                      |
| Study Population          | Participants: Isoflavane group, n=193; placebo group, n=193<br>Eligibility criteria: age $\geq 12$ ; physician diagnosed asthma; pre-bronchodilator FEV1 $\geq 50\%$ predicted; at least 12% increase in FEV1 15-30 minutes after inhaling 2-4 puffs of albuterol or positive methacholine challenge (20% fall in FEV1 at less than 8 mg/mL); prescribed daily controller asthma medication; non-smokers for $\geq 6$ months or longer with $< 10$ pack-years smoking history; poor asthma control (at least one of the following: ACQ score of $\geq 1.5$ ; use of beta-agonist for asthma symptoms two or more times per week; nocturnal awakening with asthma symptoms more than once per week); two or more episodes of asthma symptoms in the past 12 months with each requiring at least one of the following: emergency department visit, unscheduled physician visit, prednisone course, hospitalization |
| Setting                   | United States                                                                                                                                                                                                                                                                                                                                                                                                                                                                                                                                                                                                                                                                                                                                                                                                                                                                                                    |
| Interventions             | Soy isoflavone supplement or a matching placebo twice daily for 6 months                                                                                                                                                                                                                                                                                                                                                                                                                                                                                                                                                                                                                                                                                                                                                                                                                                         |
| Adherence reported yes/no | No                                                                                                                                                                                                                                                                                                                                                                                                                                                                                                                                                                                                                                                                                                                                                                                                                                                                                                               |
| Primary outcomes          | The mean changes in prebronchodilator FEV1 over 24 weeks                                                                                                                                                                                                                                                                                                                                                                                                                                                                                                                                                                                                                                                                                                                                                                                                                                                         |
| Secondary outcomes        | ACT score, the Asthma Symptoms Utility Index , AQLQ, PEF, symptom-free days (defined as days with no asthma episodes reported on diary card); and rates of episodes of poor asthma control                                                                                                                                                                                                                                                                                                                                                                                                                                                                                                                                                                                                                                                                                                                       |

|                           |                                                                                                                                                                                                                                                                                                                                                                                                                                                                                                                                                                                                                                                                                                                                                                                                                                                                                                                                                                                                                                                                                                                                                                                                                                                                 |
|---------------------------|-----------------------------------------------------------------------------------------------------------------------------------------------------------------------------------------------------------------------------------------------------------------------------------------------------------------------------------------------------------------------------------------------------------------------------------------------------------------------------------------------------------------------------------------------------------------------------------------------------------------------------------------------------------------------------------------------------------------------------------------------------------------------------------------------------------------------------------------------------------------------------------------------------------------------------------------------------------------------------------------------------------------------------------------------------------------------------------------------------------------------------------------------------------------------------------------------------------------------------------------------------------------|
| Study reference           | Soler (Omalizumab) 2001                                                                                                                                                                                                                                                                                                                                                                                                                                                                                                                                                                                                                                                                                                                                                                                                                                                                                                                                                                                                                                                                                                                                                                                                                                         |
| Study title               | The anti-IgE antibody omalizumab reduces exacerbations and steroid requirement in allergic asthmatics                                                                                                                                                                                                                                                                                                                                                                                                                                                                                                                                                                                                                                                                                                                                                                                                                                                                                                                                                                                                                                                                                                                                                           |
| Study duration            | 4–6-week run-in period                                                                                                                                                                                                                                                                                                                                                                                                                                                                                                                                                                                                                                                                                                                                                                                                                                                                                                                                                                                                                                                                                                                                                                                                                                          |
| Trial registration:       | Not documented                                                                                                                                                                                                                                                                                                                                                                                                                                                                                                                                                                                                                                                                                                                                                                                                                                                                                                                                                                                                                                                                                                                                                                                                                                                  |
| Study Population          | Participants: Omalizumab group, n=274; placebo group, n= 272<br>Eligibility criteria: age, 12-75years; diagnosis of asthma of at $\geq 1$ yr. duration who met the standard criteria of ATS and the following additional criteria: a positive skin-prick test to at least one of the allergens <i>Dermatophagoides farinae</i> , <i>D. pteronyssinus</i> , dog or cat; serum total IgE level $\geq 30$ and $\leq 700$ International Units (IU)/mL and body weight $\leq 150$ kg to allow optimal dosing of omalizumab; baseline forced expiratory volume in one second (FEV1) off bronchodilators $\geq 40\%$ and $\leq 80\%$ of predicted increasing by $\geq 12\%$ within 30 min of taking inhaled salbutamol; a mean total daily symptom score of $\geq 3.0$ (maximum 9) during the 14 days prior to randomization; treatment with inhaled corticosteroids in doses equivalent to 500–1,200 mg of beclomethasone dipropionate (BDP) per day for $\geq 3$ months prior to randomization and use of $\beta_2$ -adrenoceptor agonists on an as-needed or regular basis; stable asthma, with no significant change in regular medication and no acute exacerbation requiring additional corticosteroid treatment for $\geq 1$ month prior to the screening visit |
| Setting                   | United States, Germany, United Kingdom and South Africa                                                                                                                                                                                                                                                                                                                                                                                                                                                                                                                                                                                                                                                                                                                                                                                                                                                                                                                                                                                                                                                                                                                                                                                                         |
| Interventions             | Omalizumab or placebo subcutaneously for 7 months every 4 weeks                                                                                                                                                                                                                                                                                                                                                                                                                                                                                                                                                                                                                                                                                                                                                                                                                                                                                                                                                                                                                                                                                                                                                                                                 |
| Adherence reported yes/no | No                                                                                                                                                                                                                                                                                                                                                                                                                                                                                                                                                                                                                                                                                                                                                                                                                                                                                                                                                                                                                                                                                                                                                                                                                                                              |
| Primary outcomes          | The number of asthma exacerbations experienced per patient during the stable-steroid phase( first 16 weeks of the study) and the steroid-reduction phase(the last 12 weeks of the study)                                                                                                                                                                                                                                                                                                                                                                                                                                                                                                                                                                                                                                                                                                                                                                                                                                                                                                                                                                                                                                                                        |
| Secondary outcomes        | The number of patients experiencing at least one asthma exacerbation during both the stable-steroid and the steroid-reduction phases, per cent reduction in the BDP dose at the end of the steroid-reduction phase as a continuous variable and by category, salbutamol rescue use, asthma symptom scores, morning PEF and FEV1 % predicted                                                                                                                                                                                                                                                                                                                                                                                                                                                                                                                                                                                                                                                                                                                                                                                                                                                                                                                     |

|                           |                                                                                                                                                                                                                                                                                                                                                                                                                                              |
|---------------------------|----------------------------------------------------------------------------------------------------------------------------------------------------------------------------------------------------------------------------------------------------------------------------------------------------------------------------------------------------------------------------------------------------------------------------------------------|
| Study reference           | Tamaoki (Th2 inhibitor IL5/IL4) 2000                                                                                                                                                                                                                                                                                                                                                                                                         |
| Study title               | Effect of suplatast tosilate, a Th2 cytokine inhibitor, on steroid dependent asthma: a double-blind randomised study                                                                                                                                                                                                                                                                                                                         |
| Study duration            | 2-week run-in. 8-week treatment period                                                                                                                                                                                                                                                                                                                                                                                                       |
| Trial registration:       | Not documented                                                                                                                                                                                                                                                                                                                                                                                                                               |
| Study Population          | Participants: suplatast tosilate group, n= 43; placebo group, n= 42<br>Eligibility criteria: age $\geq 21$ years, who had been taking 1500 g or more inhaled beclomethasone daily for at least 6 weeks before the study; asthma diagnosis as per the ATS guidelines; FEV1 predicted of at least 60% and a documented FEV1 reversibility of at least 15% of compared with baseline 15 min after inhalation of the 2-agonist procaterol (20 g) |
| Setting                   | Japan                                                                                                                                                                                                                                                                                                                                                                                                                                        |
| Interventions             | Suplatast tosilate (100 mg per capsule three capsules daily) or placebo (identical in taste and appearance to suplatast tosilate)                                                                                                                                                                                                                                                                                                            |
| Adherence reported yes/no | Yes                                                                                                                                                                                                                                                                                                                                                                                                                                          |
| Primary outcomes          | Outcomes: PEF, FEV1 and asthma symptoms scores at 4 and 8 weeks                                                                                                                                                                                                                                                                                                                                                                              |

|                           |                                                                                                                                                                                                                                                                                                                                                                                                                                                                                                                                                                                                                                                                                                               |
|---------------------------|---------------------------------------------------------------------------------------------------------------------------------------------------------------------------------------------------------------------------------------------------------------------------------------------------------------------------------------------------------------------------------------------------------------------------------------------------------------------------------------------------------------------------------------------------------------------------------------------------------------------------------------------------------------------------------------------------------------|
| Study reference           | Vignola (Omalizumab) 2004                                                                                                                                                                                                                                                                                                                                                                                                                                                                                                                                                                                                                                                                                     |
| Study title               | Efficacy and tolerability of anti-immunoglobulin E therapy with omalizumab in patients with concomitant allergic asthma and persistent allergic rhinitis: SOLAR                                                                                                                                                                                                                                                                                                                                                                                                                                                                                                                                               |
| Study duration            | 4-week run-in. 28 weeks                                                                                                                                                                                                                                                                                                                                                                                                                                                                                                                                                                                                                                                                                       |
| Trial registration:       | Not documented                                                                                                                                                                                                                                                                                                                                                                                                                                                                                                                                                                                                                                                                                                |
| Study Population          | Participants: Omalizumab group, n =209; placebo group, n =196<br>Eligibility criteria: age 12–75 years; history of allergic asthma for at least 1 year with $\geq 12\%$ increase in FEV1 after 400 $\mu$ g salbutamol; IgE level from $\geq 30$ to $\leq 1300$ IU/ml and a positive skin-prick test to at least one indoor allergen: moderate-to-severe persistent allergic rhinitis symptoms for $\geq 2$ years was also necessary for inclusion: treated with $\geq 400$ $\mu$ g/day of ICS and had a history of $\geq 2$ unscheduled medical visits for their asthma during the past year or $\geq 3$ in the past 2 years: AQLQ score of $>64/192$ ; RQLQ $>56/168$ Rhinitis Quality of Life Questionnaire |
| Setting                   | United Kingdom, France, Canada, France and Italy                                                                                                                                                                                                                                                                                                                                                                                                                                                                                                                                                                                                                                                              |
| Interventions             | Placebo or omalizumab administered every 2 or 4 weeks                                                                                                                                                                                                                                                                                                                                                                                                                                                                                                                                                                                                                                                         |
| Adherence reported yes/no | No                                                                                                                                                                                                                                                                                                                                                                                                                                                                                                                                                                                                                                                                                                            |
| Primary outcomes          | The incidence of asthma exacerbations during the 28-week treatment period and the proportion of patients with improvement in both asthma and rhinitis QoL scores                                                                                                                                                                                                                                                                                                                                                                                                                                                                                                                                              |
| Secondary outcomes        | Rescue-medication use, separate AQLQ and RQLQ evaluations, Wasserfallen asthma and rhinitis clinical symptom scores, patient and investigator global evaluations of treatment effectiveness, pulmonary function tests [FEV1, forced vital capacity (FVC), morning peak expiratory flow (PEF)] and ICS use                                                                                                                                                                                                                                                                                                                                                                                                     |

|                           |                                                                                                                                                                                                                                                                                                                                                                                                                                                                                 |
|---------------------------|---------------------------------------------------------------------------------------------------------------------------------------------------------------------------------------------------------------------------------------------------------------------------------------------------------------------------------------------------------------------------------------------------------------------------------------------------------------------------------|
| Study reference           | Virchow (Zafirlukast) 2000                                                                                                                                                                                                                                                                                                                                                                                                                                                      |
| Study title               | Zafirlukast Improves Asthma Control in Patients Receiving High-Dose Inhaled Corticosteroids                                                                                                                                                                                                                                                                                                                                                                                     |
| Study duration            | 2-week pre-randomisation phase. 6 weeks                                                                                                                                                                                                                                                                                                                                                                                                                                         |
| Trial registration:       | Not documented                                                                                                                                                                                                                                                                                                                                                                                                                                                                  |
| Study Population          | Participants: Zafirlukast group, n=180; placebo group, n=188<br>Eligibility criteria: age 17 to 71 years; asthma diagnosis according to GINA criteria and NHLBI guidelines; patient were required to have not smoked during the preceding 6 months; FEV1% predicted of 50% to 75%, a reversibility PEFr or FEV1 of $\geq 15\%$ after inhalation of $\leq 400$ mg albuterol, and current therapy with inhaled corticosteroids (beclomethasone $\geq 1,200$ mg/day or equivalent) |
| Setting                   | United Kingdom                                                                                                                                                                                                                                                                                                                                                                                                                                                                  |
| Interventions             | Zafirlukast 80 mg twice daily, placebo for 6 weeks                                                                                                                                                                                                                                                                                                                                                                                                                              |
| Adherence reported yes/no | No                                                                                                                                                                                                                                                                                                                                                                                                                                                                              |
| Primary outcomes          | The change in mean morning PEFr from baseline to week 6                                                                                                                                                                                                                                                                                                                                                                                                                         |
| Secondary outcomes        | The change in mean evening PEFr, FEV1 daytime symptom score, SABA use from baseline to week 6 risk of an exacerbation of asthma                                                                                                                                                                                                                                                                                                                                                 |

|                           |                                                                                                                                                                                                                                                                                                 |
|---------------------------|-------------------------------------------------------------------------------------------------------------------------------------------------------------------------------------------------------------------------------------------------------------------------------------------------|
| Study reference           | Wang (Cordyceps sinensis) 2016                                                                                                                                                                                                                                                                  |
| Study title               | Herbal Medicine Cordyceps sinensis Improves Health-Related Quality of Life in Moderate-to-Severe Asthma                                                                                                                                                                                         |
| Study duration            | 3 months                                                                                                                                                                                                                                                                                        |
| Trial registration:       | ChiCTR-IPC-16008730                                                                                                                                                                                                                                                                             |
| Study Population          | Participants: cordyceps group, n=60; control group, n=60<br>Eligibility criteria: age $\geq$ 18 years; moderate or severe asthma with evidence of fixed airflow obstruction following a trial of maximum bronchodilator therapy and a trial of oral corticosteroids of at least 3-week duration |
| Setting                   | China                                                                                                                                                                                                                                                                                           |
| Interventions             | Cordyceps sinensis (1.2 g, 3 times per day, Corbrin capsule, Hangzhou Huadong Pharmaceutical Co. Ltd.) in addition to ICS/LABA or placebo                                                                                                                                                       |
| Adherence reported yes/no | No                                                                                                                                                                                                                                                                                              |
| Primary outcomes          | AQLQ 1 day before, 1 day after, and 3 months after the intervention period                                                                                                                                                                                                                      |
| Secondary outcomes        | FEV1, PEFR, and FEV1/FVC, and serum IgG, IgE, MMP9, IFN- $\gamma$ , IL-4, and ICAM-1 levels were evaluated before and after the treatment period                                                                                                                                                |

|                           |                                                                                                                                                                                                                                                                                                                                                                                                                                                                                    |
|---------------------------|------------------------------------------------------------------------------------------------------------------------------------------------------------------------------------------------------------------------------------------------------------------------------------------------------------------------------------------------------------------------------------------------------------------------------------------------------------------------------------|
| Study reference           | Wenzel (Nebulized dehydroepi-androsterone-3-sulfate) 2010                                                                                                                                                                                                                                                                                                                                                                                                                          |
| Study title               | Nebulised Nebulized dehydroepi-androsterone-3-sulfate                                                                                                                                                                                                                                                                                                                                                                                                                              |
| Study duration            | 5-week run-in period. 6weeks                                                                                                                                                                                                                                                                                                                                                                                                                                                       |
| Trial registration:       | ANZCTR: 012607000192482                                                                                                                                                                                                                                                                                                                                                                                                                                                            |
| Study Population          | Participants: Nebulised Nebulized dehydroepi-androsterone-3-sulfate group, n=140; placebo group, n=140<br>Eligibility criteria: Patients 18-70 years of age, with $\geq 1$ -year history of asthma and FEV1% predicted of $\geq 60$ at screening , $\geq 3$ month of therapy with $\geq 500\mu\text{g}$ of fluticasone equivalent +LABA , rescue $\beta$ -agonist use within the past month , non-smoking for $\geq 1$ year, and a total pack-year smoking history of $< 10$ years |
| Setting                   | 20 sites in Australia and 14 site in India                                                                                                                                                                                                                                                                                                                                                                                                                                         |
| Interventions             | 70mg GenaFlow(Nebulised Nebulized dehydroepi-androsterone-3-sulfate) once daily or placebo                                                                                                                                                                                                                                                                                                                                                                                         |
| Adherence reported yes/no | No                                                                                                                                                                                                                                                                                                                                                                                                                                                                                 |
| Primary outcomes          | Median change from baseline ACQ at 6 weeks                                                                                                                                                                                                                                                                                                                                                                                                                                         |
| Secondary outcomes        | Proportions of patients who achieved a minimally important difference of -0.5 in ACQ and the average change in ACQ                                                                                                                                                                                                                                                                                                                                                                 |

|                           |                                                                                                                                                                                                                                                                                                                                                                                                                                                                                                                                                                                                                                                                                                                                                                                                                                                                                                                                                  |
|---------------------------|--------------------------------------------------------------------------------------------------------------------------------------------------------------------------------------------------------------------------------------------------------------------------------------------------------------------------------------------------------------------------------------------------------------------------------------------------------------------------------------------------------------------------------------------------------------------------------------------------------------------------------------------------------------------------------------------------------------------------------------------------------------------------------------------------------------------------------------------------------------------------------------------------------------------------------------------------|
| Study reference           | Wenzel (Golimumab) 2009                                                                                                                                                                                                                                                                                                                                                                                                                                                                                                                                                                                                                                                                                                                                                                                                                                                                                                                          |
| Study title               | A Randomized, Double-blind, Placebo-controlled Study of Tumor Necrosis Factor- $\alpha$ Blockade in Severe Persistent Asthma                                                                                                                                                                                                                                                                                                                                                                                                                                                                                                                                                                                                                                                                                                                                                                                                                     |
| Study duration            | 2-week run-in period. 52 weeks                                                                                                                                                                                                                                                                                                                                                                                                                                                                                                                                                                                                                                                                                                                                                                                                                                                                                                                   |
| Trial registration:       | NCT00207740                                                                                                                                                                                                                                                                                                                                                                                                                                                                                                                                                                                                                                                                                                                                                                                                                                                                                                                                      |
| Study Population          | <p>Participants: golimumab 200mg group, n=78; golimumab100mg group, n=76; golimumab 50mg group, n=77;placebo group, n=78</p> <p>Eligibility criteria: age <math>\geq 18</math> years; diagnosed with asthma for <math>\geq 3</math> years; uncontrolled severe asthma for <math>\geq 1</math> years: symptomatic despite (asthma symptoms on more than one-third of days for 3 or more months before screening) despite continuous treatment with high-dose ICS (fluticasone <math>&gt;1000</math> mg or equivalent) and LABA, with or without continuous oral corticosteroids (OCS); two or more asthma exacerbations within the previous year; 1 or more years without smoking and a smoking history of less than 10 pack-years and a history of at least one of the following within 5 years of screening: postbronchodilator reversibility in FEV1 of <math>\geq 12\%</math>, or PEFr diurnal variation of <math>\geq 30\%</math> or BHR</p> |
| Setting                   | United Kingdom, France, Poland, Hungary, France, The Netherlands, Hungary and Italy                                                                                                                                                                                                                                                                                                                                                                                                                                                                                                                                                                                                                                                                                                                                                                                                                                                              |
| Interventions             | Subcutaneous injections of placebo, 50 mg golimumab (75 mg loading dose at baseline), 100 mg golimumab (150 mg at baseline), or 200 mg golimumab (300 mg at baseline) were given every 4 weeks for 52 weeks                                                                                                                                                                                                                                                                                                                                                                                                                                                                                                                                                                                                                                                                                                                                      |
| Adherence reported yes/no | No                                                                                                                                                                                                                                                                                                                                                                                                                                                                                                                                                                                                                                                                                                                                                                                                                                                                                                                                               |
| Primary outcomes          | The change in prebronchodilator percent predicted FEV1 and number of severe asthma exacerbations from baseline through week 24                                                                                                                                                                                                                                                                                                                                                                                                                                                                                                                                                                                                                                                                                                                                                                                                                   |
| Secondary outcomes        | The change from baseline through week 24 in the AQLQ score, rescue medication use, and domiciliary morning PEFr                                                                                                                                                                                                                                                                                                                                                                                                                                                                                                                                                                                                                                                                                                                                                                                                                                  |



|                           |                                                                                                                                                                                                                                                                                                                                                                                                                                                                                                |
|---------------------------|------------------------------------------------------------------------------------------------------------------------------------------------------------------------------------------------------------------------------------------------------------------------------------------------------------------------------------------------------------------------------------------------------------------------------------------------------------------------------------------------|
| Study reference           | Wenzel (Dupilumab) 2013                                                                                                                                                                                                                                                                                                                                                                                                                                                                        |
| Study title               | Dupilumab in Persistent Asthma with Elevated Eosinophil Levels                                                                                                                                                                                                                                                                                                                                                                                                                                 |
| Study duration            | 2-week screening period. 20 weeks                                                                                                                                                                                                                                                                                                                                                                                                                                                              |
| Trial registration:       | NCT01312961                                                                                                                                                                                                                                                                                                                                                                                                                                                                                    |
| Study Population          | Participants: Dupilumab group, n=52; Placebo group, n=52<br>Eligibility criteria: age 18 to 65 years old; persistent, moderate-to-severe asthma; elevated blood eosinophil count ( $\geq 300$ cells per microliter) or an elevated sputum eosinophil level ( $\geq 3\%$ ) at screening; asthma symptoms that were not well controlled with medium-dose to high-dose ICS plus LABAs (fluticasone [ $\geq 250$ $\mu\text{g}$ ] and salmeterol [50 $\mu\text{g}$ ] twice daily or the equivalent) |
| Setting                   | United States                                                                                                                                                                                                                                                                                                                                                                                                                                                                                  |
| Interventions             | Once weekly subcutaneous injections of dupilumab (300 mg) or placebo for 12 weeks                                                                                                                                                                                                                                                                                                                                                                                                              |
| Adherence reported yes/no | No                                                                                                                                                                                                                                                                                                                                                                                                                                                                                             |
| Primary outcomes          | The occurrence of an asthma exacerbation, during the 12-week intervention period                                                                                                                                                                                                                                                                                                                                                                                                               |
| Secondary outcomes        | The time to an asthma exacerbation and the change from baseline at each visit and at week 12 in FEV1, morning and evening PEF, ACQ5 score, morning and evening asthma symptom scores nocturnal awakenings, and the number of albuterol or levalbuterol inhalations per day                                                                                                                                                                                                                     |

## **Appendix 3 Risk of bias**

### **Risk of bias in included studies**

#### **Allocation**

Forty-eight studies (55.2%) were assessed as having a low risk of selection bias for the random sequence domain because the authors used computer-generated random sequencing. The remaining 39 (44.8%) studies were categorised as having an unclear risk of bias because, despite being described as 'randomised', no further information was provided. Twenty-eight (32.2%) studies were assessed as having a low risk for the allocation concealment domain, and 59 (67.8%) studies were evaluated as having an unclear risk of bias in the allocation domain because no information was provided that described how allocation concealment was maintained throughout the study.

#### **Blinding**

Thirty-seven studies (42.5%) were judged as having a low risk of performance bias, and 46 (52.9%) studies were evaluated as having an unclear risk of performance bias. Four studies (4.6%) were assessed as having a high risk of performance bias. Of these, 2 studies<sup>6, 76</sup> were open-label design; one study<sup>29</sup> both investigators and participants were not blinded, and in the other study<sup>90</sup> the study investigators were blinded, but no information was provided regarding blinding of study participants.

Four (4.6%) studies were assessed as having a high risk of detection bias. Two of these studies,<sup>6, 76</sup> were open-label design, and in the other 2 studies<sup>29, 90</sup>, the outcome assessors were not blinded. Twenty-five (28.7%) studies were assessed to have a low risk of detection bias, while the remaining 58 (66.7%) studies were judged as having unclear detection bias because they did not provide information regarding blinding of outcome assessors.

#### **Incomplete outcome data**

Most studies were assessed as having a low risk of attrition bias with only 3 (3.4%) studies evaluated as having an unclear risk, and two (2.3%) studies were assessed as high risk. Gotfried et al. reported clinical outcomes for the clarithromycin group and omitted data in the control group, the rationale was that valid comparisons could not be conducted because of unequal population distribution between the two groups. Kishiyama et al. enrolled 54 participants, only 30 participants completed the study, but details about patients who did not complete the study were not reported. Of the three studies assessed as unclear risk; Pavord et al. did not provide information on the two out of 17 who did not complete the study; Salmun et al. omitted information on the patients who were screened and patients who withdrew from the study, while Wenzel et al. did not provide reasons why patients withdrew from the study.

#### **Selective reporting**

Eighty-five (97.7%) studies were judged as having a low risk of selection bias. Two (2.3%) studies had a high risk of selection bias; one study<sup>39</sup> pre-specified PEF and spirometry as their secondary outcomes but the results were not reported while the other study<sup>41</sup>, there was selective reporting of outcomes in the clarithromycin group and the control group outcomes were not published.

Table 1 Risk of bias summary for all included trials. The table is composed of the consensus opinion of the review authors' judgements about each methodological quality item.

| Study                          | Random sequence generation (Selection bias) | Allocation concealment (Selection bias) | Blinding of participants & personnel (Performance bias) | Blinding of outcome assessment (Detection bias) | Incomplete outcome data (Attrition bias) | Selective reporting (Selection bias) | Other bias |
|--------------------------------|---------------------------------------------|-----------------------------------------|---------------------------------------------------------|-------------------------------------------------|------------------------------------------|--------------------------------------|------------|
| Ayres (Omalizumab) 2004        | ?                                           | ?                                       | +                                                       | +                                               | -                                        | -                                    | -          |
| Bardelas (Omalizumab) 2012     | ?                                           | ?                                       | ?                                                       | ?                                               | -                                        | -                                    | -          |
| Beeh (Tiotropium) 2014         | -                                           | -                                       | ?                                                       | ?                                               | -                                        | -                                    | -          |
| Bel (Mepolizumab) 2014         | -                                           | -                                       | -                                                       | -                                               | -                                        | -                                    | -          |
| Berry (Eternacept) 2006        | -                                           | ?                                       | ?                                                       | ?                                               | -                                        | -                                    | -          |
| Bjermer (Reslizumab) 2016      | ?                                           | ?                                       | ?                                                       | ?                                               | -                                        | -                                    | -          |
| Bleecker (Benralizumab) 2016   | -                                           | -                                       | -                                                       | -                                               | -                                        | -                                    | -          |
| Brightling (Tralokinumab) 2015 | -                                           | -                                       | -                                                       | -                                               | -                                        | -                                    | -          |
| Brinke (IM triamcinolone) 2004 | ?                                           | ?                                       | ?                                                       | ?                                               | -                                        | -                                    | -          |
| Brusselle (Azithromycin) 2013  | -                                           | ?                                       | ?                                                       | ?                                               | -                                        | -                                    | -          |
| Busse (Omalizumab) 2001        | ?                                           | ?                                       | ?                                                       | ?                                               | -                                        | -                                    | -          |
| Busse (Brodalumab) 2013        | -                                           | -                                       | ?                                                       | ?                                               | -                                        | -                                    | -          |

|                                      |   |   |   |   |   |   |   |
|--------------------------------------|---|---|---|---|---|---|---|
| Busse (Daclizumab) 2008              | ? | ? | ? | ? | - | - | - |
| Busse (AMG 853) 2013                 | ? | ? | ? | ? | - | - | - |
| Cahill (Imatinib) 2017               | ? | ? | ? | ? | - | - | - |
| Castro (Bronchial thermoplasty) 2010 | - | ? | - | - | - | - | - |
| Castro (Benralizumab) 2014           | - | - | - | ? | - | - | - |
| Castro (Reslizumab) 2015             | - | - | - | - | - | - | - |
| Castro (Reslizumab) 2011             | - | - | - | - | - | - | - |
| Chanez (Omalizumab) 2010             | ? | ? | - | ? | - | - | - |
| Corren (AMG 317) 2010                | - | ? | ? | ? | - | - | - |
| Corren (Lebrikizumab) 2011           | - | - | - | - | - | - | - |
| Corren (Reslizumab) 2016             | ? | ? | - | - | - | - | + |
| Cox (Bronchial thermoplasty) 2007    | - | ? | + | + | - | - | - |
| Coyle (Bosentan) 2013                | - | - | - | ? | - | - | - |
| DeBoever (GSK679586) 2014            | - | - | - | - | - | - | - |
| Dente (Prednisolone) 2010            | ? | ? | ? | ? | - | - | - |
| Erin (Infliximab) 2006               | ? | ? | - | - | - | - | - |
| Fernandes (Prednisolone) 2014        | - | ? | ? | ? | - | - | - |
| FitzGerald (Benralizumab) 2016       | - | - | - | ? | - | - | - |
| Flood-Page (Mepolizumab) 2007        | ? | ? | - | ? | - | - | - |
| Gao J-M (Montelukast) 2013           | ? | ? | ? | ? | - | - | - |

|                                |   |   |   |   |   |   |   |
|--------------------------------|---|---|---|---|---|---|---|
| Garcia (Omalizumab) 2013       | - | ? | ? | ? | - | - | - |
| Gevaert (Omalizumab) 2013      | - | ? | - | ? | - | + | - |
| Girodet (Gallopamil) 2015      | - | - | - | - | - | - | - |
| Gotfried (Clarithromycin) 2004 | ? | ? | ? | ? | + | + | - |
| Haldar (Mepolizumab) 2009      | - | ? | - | - | - | - | - |
| Hanania (Omalizumab) 2011      | - | - | - | - | - | - | - |
| Hanania (Lebrikizumab) 2015    | - | - | - | - | - | - | - |
| Hanania (Lebrikizumab) 2016    | - | - | - | ? | - | - | - |
| Hedman (Methotrexate) 1996     | ? | ? | ? | ? | - | - | - |
| Hodgson (Ciclesonide) 2015,    | ? | ? | ? | ? | - | - | - |
| Holgate (Omalizumab) 2004      | ? | ? | ? | ? | - | - | - |
| Holgate (Etanercept) 2011      | ? | ? | ? | ? | - | - | - |
| Humbert (Omalizumab) 2005      | ? | ? | - | - | - | - | - |
| Humbert (Masitinib) 2009       | ? | ? | ? | ? | - | - | - |
| Juergens (Eucalyptol) 2003     | - | - | - | ? | - | - | - |
| Kaler (Pioglitazone) 2017      | - | - | - | ? | - | - | - |
| Kanzow (Methotrexate) 1995     | ? | ? | ? | ? | - | - | - |
| Kenyon (L-Arginine) 2011       | ? | ? | - | ? | - | - | - |
| Kerstjens (Tiotropium) 2011    | - | ? | ? | ? | - | - | - |
| Kerstjens (Tiotropium) 2015    | - | ? | - | ? | - | - | - |

|                                      |   |   |   |   |   |   |   |
|--------------------------------------|---|---|---|---|---|---|---|
| Kishiyama (IVIG) 1999                | ? | ? | ? | - | + | - | - |
| Lanier (Omalizumab) 2003             | ? | ? | ? | ? | - | - | - |
| Laviollette (Benralizumab) 2013      | - | ? | ? | ? | - | - | - |
| Li (Omalizumab) 2014                 | - | ? | ? | ? | - | - | - |
| Lock (Ciclosporin) 1996              | ? | ? | - | - | - | - | - |
| Lomia (Carbamazepine) 2006           | - | - | - | ? | - | - | - |
| Marin (Nedocromil sodium) 1996       | - | ? | ? | ? | - | - | - |
| Morjaria (Etanercept) 2008           | ? | ? | ? | ? | - | - | - |
| Nair (SCH 527123) 2012               | ? | ? | ? | ? | - | - | - |
| Nair (Mepolizumab) 2009              | - | - | - | - | - | - | - |
| Nair (Benralizumab) 2017             | - | - | ? | - | - | - | - |
| Nizankowska (Ciclosporin) 1995       | ? | ? | - | - | - | - | - |
| Ogirala (IM triamcinolone) 1995      | ? | ? | ? | ? | - | - | - |
| Oh (MEDI528) 2013                    | - | - | ? | ? | - | - | - |
| Ohta (Omalizumab) 2009               | ? | ? | ? | ? | - | - | - |
| Ortega (Mepolizumab) 2014            | - | - | - | - | - | - | - |
| Park (Benralizumab) 2016             | - | ? | ? | ? | - | - | - |
| Pavord (Bronchial thermoplasty) 2007 | - | ? | + | + | ? | - | - |
| Pavord (Mepolizumab) 2012            | - | - | - | - | - | - | - |
| Piper (Tralokinumab) 2013            | ? | ? | ? | ? | - | - | - |

|                                                                 |   |   |   |   |   |   |   |
|-----------------------------------------------------------------|---|---|---|---|---|---|---|
| Robinson (Montelukast) 2001                                     | ? | - | ? | ? | - | - | - |
| Rubin (Omalizumab) 2012                                         | ? | ? | + | + | - | - | - |
| Salmun (IVIG) 1999                                              | - | ? | - | ? | ? | - | - |
| Sano (Sodium cromoglicate) 2006                                 | - | ? | - | ? | - | - | - |
| Bosquet (Omalizumab) 2011                                       | - | ? | ? | ? | - | - | - |
| Simpson (Clarithromycin) 2008                                   | - | ? | - | ? | - | - | - |
| Smith (Isoflavane) 2015                                         | - | - | - | - | - | - | - |
| Soler (Omalizumab) 2001                                         | ? | ? | ? | ? | - | - | - |
| Tamaoki (Th2 inhibitor IL5/IL4) 2000                            | - | - | ? | ? | - | - | - |
| Vignola (Omalizumab) 2004                                       | ? | ? | ? | ? | - | - | - |
| Virchow (Zafirlukast) 2000                                      | ? | ? | ? | ? | - | - | - |
| Wang (Cordyceps sinensis) 2016                                  | ? | ? | ? | ? | - | - | - |
| Wenzel (Nebulized dehydroepiandrosterone-3-sulfate) 2010        | ? | ? | ? | ? | ? | - | - |
| Wenzel (Golimumab) 2009                                         | - | ? | ? | - | - | - | - |
| Wenzel (Dupilumab) 2013                                         | - | - | - | - | - | - | - |
| '?' = unclear risk of bias (ROB), '-' = low ROB, '+' = high ROB |   |   |   |   |   |   |   |

## Appendix 4 Modelling effects of assessing adherence on FEV1

### Determining the effect of adherence variations on FEV1

To estimate the effects of variations in adherence to maintenance therapy on FEV1, it is first necessary to determine the effect of ICS/LABA treatment on FEV1 compared to no treatment. The majority of trials of ICS/LABA treatment compare to ICS or LABA alone, and so do not provide an unbiased estimate of effectiveness. However, Shapiro et al conducted an RCT of fluticasone/salmeterol against placebo. Shapiro et al reported a mean change in FEV1 at week 12 of 0.48 litres with a standard error of 0.05 giving a standard deviation of 0.45 litres. They assessed adherence to fluticasone/salmeterol using paper diary and dose counting to assess adherence during the screening phase and the 12 weeks duration of the study. They reported mean treatment adherence rates that ranged from 91% to 95% across treatment groups which is consistent with pill count adherence rates obtained in Sulaiman's study.

However, since this study was performed without the use of an objective measure of adherence, it is likely that actual adherence was sub-optimal, and so these results may be an under-estimate of the true effect of fluticasone/salmeterol on FEV1. To estimate the 'true' mean change in FEV1, we follow the assumption that the actual adherence rate will be similar to Sulaiman's actual adherence rate at baseline ( $\mu = 0.65, \sigma = 0.3$ ). Assuming the measured mean change in FEV1 is a linear function of the fluticasone/salmeterol adherence rate, then the measured mean change in FEV1 is equal to the "true effect" multiplied by the fluticasone/salmeterol adherence rate, and so hence the 'true' mean change in FEV1 is given by;

$$\mu_{measured} = \mu_{true} \mu_{adherence}$$

$$\mu_{true} = \mu_{measured} \div 0.65 = \frac{0.48}{0.65} = 0.74 \text{ litres}$$

Similarly, using the standard formula for the variance of a product, the 'true' standard deviation can be calculated;

$$\sigma_{measured}^2 = \sigma_{adherence}^2 \mu_{true}^2 + \sigma_{adherence}^2 \mu_{true}^2 + \sigma_{true}^2 \mu_{adherence}^2$$

$$\sigma_{true}^2 = \{0.45^2 - (0.3^2 \times 0.74^2)\} \div \{0.3^2 + 0.65^2\} = 0.3$$

$$\sigma = 0.55 \text{ litres}$$

The estimated 'true' mean change in FEV1 adjusted for baseline adherence rate of  $0.65 \pm 0.3$  is  $0.74 \pm 0.55$  litres where  $\mu_{ICSLABA} = 0.74$  and  $\sigma_{ICSLABA} = 0.55$ . This estimate was used in our model to determine the effects of adherence variations on FEV1 adjusted for objectively measured adherence.

### Scenario 1: Month-to-month variability in the absence of adherence monitoring throughout the trial

A model of the variance introduced into study outcomes due to within-subjects variations in month to month adherence to ICS/LABA was conducted. Sulaiman et al found that there was a large within subjects variability, with a mean absolute change of more than 20% from month 1 to month 3. The change in adherence to fluticasone/salmeterol in the control group was  $-0.8\% \pm 31.3\%$  from month 1 to month 3. While the change in the mean is negligible, there is a large variability that can affect the significance of the study results.

Assuming that the mean adherence rate does not change from month to month, the standard deviation of the within-subject month to month variation in adherence can be used to estimate the additional adherence introduced by the absence of assessing adherence throughout the study. Using  $(\mu_{adh}, \sigma_{adh}) = (0, 0.313)$ , the estimated 'true' change in FEV1,  $\mu_{ICSLABA} = 0.74$  and  $\sigma_{ICSLABA} = 0.55$  and the standard formula for the variance



of a product the additional variance in outcomes attributable to adherence variations can be estimated. The estimated month to month variance introduced into FEV1 outcomes is

$$\begin{aligned}\sigma_{additional}^2 &= \sigma_{adh}^2 \sigma_{ICSLABA}^2 + \mu_{ICSLABA}^2 \sigma_{adh}^2 + \mu_{adh}^2 \sigma_{ICSLABA}^2 \\ &= (0.313^2 \times 0.55^2) + (0.74^2 \times 0.313^2) + (0^2 \times 0.55^2) = 0.0832\end{aligned}$$

### Scenario 2: Regression to the mean

Using the data from Sulaiman 's study data, the difference in adherence between month 3 (M3) and month 1 (M1) for the patients who achieved  $\geq 80\%$  adherence at baseline (59 of 170 patients) was calculated. On average from M1 to M3 adherence decreased significantly (mean change  $-8.4 \pm 21.17\%$ ) giving,

$$(\mu_{adh}, \sigma_{adh}) = (-0.084, 0.2117)$$

Using the estimated 'true' mean change in FEV1 ( $0.74 \pm 0.55$  litres where  $\mu_{ICSLABA} = 0.74$  and  $\sigma_{ICSLABA} = 0.55$ ) and the mean change adherence rate for the patients who achieved adherence rate of  $\geq 80\%$  the estimated additional variance introduced by assessing adherence only at baseline mean is calculated below;

The estimate of the variance introduced into the FEV1 outcome is

$$(0.2117^2 \times 0.55^2) + (0.74^2 \times 0.2117^2) + (0.084^2 \times 0.55^2) = 0.040233278$$

The additional variance in FEV1 due to the absence of monitoring adherence to ICS/LABA is 0.0402.

This additional variance was subtracted from the variance in each individual study to calculate the new standard deviations (example below).

Example: In the Bjermer study the mean change in FEV1 from baseline in the Reslizumab group was ( $0.286 \pm 0.553$ ). The estimate of the variance introduced into FEV1 outcome in the absence of adherence monitoring was 0.0402. The FEV1 variance is:

$$\{(0.553)^2 - 0.0402\} = 0.265576$$

And this gives a new standard deviation of 0.54 (square root of 0.265576).

### Scenario 3: Hawthorne Effect

The variance of the difference between two random variables is given by:

$$Var(Y - X) = Var(Y) + Var(X) - 2Cov(X, Y)$$

Where  $Cov(X, Y)$  is the covariance of X and Y.

Where X and Y are independent, this gives  $Var(Y - X) = Var(Y) + Var(X)$ , however, if X and Y are positively correlated, then the covariance is positive and hence the variance of the change is reduced. The minimum of  $Var(Y - X)$  is thus found where Y and X are perfectly positively correlated, and the covariance is at a maximum. The minimum variance introduced by the Hawthorne effect can be estimated. Assuming perfect correlation between Y and X, we have

$$Y = aX + c, \text{ where } a = \frac{\sigma_y}{\sigma_x} \text{ and } c = \mu_y - \mu_x$$

Hence

$$Cov(X, Y) = Cov(X, aX + c) = aCov(X, X) = aVar(X)$$

And so we have

$$Var(Y - X) = Var(Y) + Var(X) - 2aVar(X) = Var(Y) + (1 - 2\frac{\sigma_y}{\sigma_x})Var(X)$$

Using the above formula the minimum variance of the change in adherence can be calculated. Given initial standard deviation,  $\sigma_{init}$ , and post-change standard deviation  $\sigma_{post}$ , the variance of the change in adherence is given by

$$\sigma_{adh}^2 = \sigma_{post}^2 + (1 - 2\frac{\sigma_{post}}{\sigma_{init}})\sigma_{init}^2$$

Assuming that after the Hawthorne effect, all patients achieve  $\geq 80\%$  adherence, then the maximum subsequent standard deviation is  $\sigma_{post} = 10\%$

However, this maximum post-change standard deviation is achieved if precisely half of the patients have adherence of 80%, the remaining half have 100%, which contradicts the assumption that initial and post-change values are perfectly correlated. Excluding such unlikely multimodal distributions, then the largest reasonable standard deviation is when the distribution is uniform between 80% and 100%. This gives  $\sigma_{post} \simeq 5 \cdot 8\%$  which in turn gives:

$$\sigma_{adh}^2 \simeq 0 \cdot 0493$$

Corresponding to  $\sigma_{adh} = 22 \cdot 3\%$ , where the post-change mean is 90%, corresponding to a mean change,  $\mu_{adh} = 25\%$ . We thus choose  $(\mu_{adh}, \sigma_{adh}) = (0 \cdot 25, 0 \cdot 223)$  as our estimate of the mean and standard deviation of the adherence change.

Using the estimates of effect on FEV1 as before, we get

$$\sigma_{additional}^2 = \sigma_{adh}^2 \sigma_{ICSLABA}^2 + \mu_{ICSLABA}^2 \sigma_{adh}^2 + \mu_{adh}^2 \sigma_{ICSLABA}^2 = 0 \cdot 0612$$

## Appendix 5 Modelling effects of assessing adherence on exacerbations

While inconsistency in both the definition of exacerbations and reporting of exacerbation rates makes it impractical to apply the models described in Appendix 4 to the exacerbation outcomes, we believe that similar reasoning applies to exacerbations, and that statistical power to detect exacerbation reductions in RCTs is likely to be improved by optimizing adherence to maintenance therapy before randomization. Here we offer a brief summary of this argument and our statistical reasoning.

As discussed in the introduction to this article, baseline adherence rates to ICS/LABA are generally poor and highly variable. Thus, it is likely that optimization of adherence to ICS/LABA prior to study enrollment would improve asthma control and reduce the baseline exacerbation rate in enrolled patients. The expected impact of this reduction in the baseline rate on statistical power depends strongly on how we expect the effects of the maintenance therapy and the add-on therapy to combine.

In particular, we may model the effect of add-on therapy as multiplicative, where exacerbations will be reduced by a fixed proportion of the rate achieved with maintenance therapy alone, or additive, where the expected number of exacerbations will be reduced by a fixed amount regardless of the effect of the maintenance therapy. In the multiplicative case, the power to detect a difference in exacerbation rate is expected to increase as function of the baseline rate, and so a reduction in the baseline rate (e.g. due to optimization of adherence) would result in a loss in power. However, in the additive case this is reversed, and the relationship between the baseline rate and study power is approximately the inverse of that in the multiplicative case, as shown below. We would argue that this model is more appropriate than the multiplicative model to describe the effects of add-on biological therapy.

The biologic therapies considered in these studies have been developed with the specific aim of treating patients whose asthma is poorly controlled by ICS therapy, and are designed to target distinct inflammatory pathways not affected by ICS. Hence we can think of asthma exacerbations as being divided into two phenotypes: those preventable with ICS, and those potentially preventable with biologic therapy. If we assume that there is little overlap between these phenotypes, then a reduction in the number of ICS-treatable exacerbations (e.g. due to adherence optimization) should not affect the number of exacerbations potentially prevented by biologic therapy, and so the effects can be considered purely additive. By contrast, treating the effects as multiplicative is equivalent to assuming complete overlap between these phenotypes. This is not only unlikely given current understanding of severe asthma, but would also seem to negate the need for add-on biological treatment. As a result it appears clear that the additive assumption is the more appropriate.

### The effect of baseline rate on statistical power in poisson regression

The standard model for comparing the incidence rates between groups is poisson regression.

In this model, the mean exacerbation rate,  $\lambda$  in each arm of the study is modelled by a poisson distribution with mean rate

$$\lambda_i = \exp(\beta_0 + \beta_1 X_i),$$

Where the coefficient  $\beta_0$  represents the natural logarithm of the baseline rate (i.e. the rate of exacerbations achieved with normal maintenance therapy) and  $\beta_1$  is the logarithm of the Incidence Rate Ratio.  $X$  is an indicator variable equal to 0 for subjects in the placebo group, and 1 for subjects in the treatment group.

A statistical test for a difference in exacerbation rates between these two groups is equivalent to testing for a difference between the means of the two groups.

The difference between the means is given by

$$\delta\lambda = \exp(\beta_0) - \exp(\beta_0 + \beta_1) = (1 - \exp(\beta_1)) \exp(\beta_0),$$

While the pooled variance across the two groups is approximated by

$$\sigma_p^2 = \frac{1}{2}(\lambda_0 + \lambda_1) = \frac{1}{2}(1 + \exp(\beta_1)) \exp(\beta_0),$$

And so we can construct the expected value of the Z-score for this difference:

$$Z \simeq \sqrt{n} \frac{\delta\lambda}{\sigma_p} \propto \frac{(1 - \exp(\beta_1)) \exp(\beta_0)}{\sqrt{(1 + \exp(\beta_1)) \exp(\beta_0)}} = \frac{(1 - \exp(\beta_1)) \sqrt{\exp(\beta_0)}}{\sqrt{(1 + \exp(\beta_1))}}$$

In the multiplicative case where the Incidence Rate Ratio is fixed, the coefficient  $\beta_1$  is a constant, independent of  $\beta_0$ , and so the expected Z-score is proportional to the square root of  $\exp(\beta_0)$ . As a result, the expected value of the Z-score, and hence the power to detect a difference, is reduced as  $\beta_0$  decreases.

However, in the additive case, the difference between the mean exacerbation rates,  $\delta\lambda$ , is a constant, so we can set  $\delta\lambda = c$ , and the coefficient  $\beta_1$  is related to  $\beta_0$  by  $\beta_1 = \ln(1 - \frac{c}{\exp(\beta_0)})$

The expected Z-score then becomes

$$Z = \frac{\frac{c}{\exp(\beta_0)} \sqrt{\exp(\beta_0)}}{\sqrt{\left(2 - \frac{c}{\exp(\beta_0)}\right)}} = \frac{c}{\sqrt{2 \exp(\beta_0) - c}}$$

and so the expected Z-score and hence the power increases as the baseline rate is decreased.
